# Supplementary material for: Fibroblast Growth Factor 2 Enhances Zika Virus Infection in Human Fetal Brain
Source: Oxford University Press journal article supplement (doi:10.1093/infdis/jiz073), 2019-02-13
Supplement: jiz073_suppl_supplementary_tables.xlsx [file jiz073_suppl_supplementary_tables.xlsx]

## Sheet: Sheet 1
Description of RNAseq libraries in acutely infected HFAs
Donor	Group	Repeat	#_reads	#_mapped_reads	%_mapped_reads
1	control	1	83022326	80660884	97.1557
1	control	2	92298177	89738530	97.2268
1	control	3	88552409	8.60597e+07	97.185
1	zika	1	95916936	9.30031e+07	96.9621
1	zika	2	87658634	85175837	97.1677
1	zika	3	91049615	8.8389e+07	97.0779
4	control	1	68564297	65836972	96.0222
4	control	2	40121312	38298183	95.456
4	control	3	47032583	4.51621e+07	96.0231
4	zika	1	39108982	36786684	94.062
4	zika	2	38613833	36591705	94.7632
4	zika	3	42355534	40304790	95.1583
5	control	1	45301022	4.23837e+07	93.5601
5	control	2	44172762	4.06824e+07	92.0984
5	control	3	43365709	4.15307e+07	95.7686
5	zika	1	50338354	48043195	95.4405
5	zika	2	39762000	3.79731e+07	95.5009
5	zika	3	42942457	4.08911e+07	95.2231

## Sheet: Sheet 2
Differentially expressed transcripts as detected by the Kallisto/Sleuth pipeline in acutely infected HFAs
target_id		pval	qval	b	se_b	mean_obs	var_obs	tech_obs	sigma_sq	smooth_sigma_sq	final_sigma_sq	ens_gene	ext_gene	FoldChange	GO term accession	GO term name	GO term definition	wikigenes description	phenotype
ENST00000392583	OAS2	2.35403e-33	1.08649e-30	7.66172	0.636671	5.77922	17.4857	0.192254	1.63182	0.0193216	1.63182	ENSG00000111335	OAS2	2125.4	GO:0018377	protein myristoylation	The covalent attachment of a myristoyl group to a protein. [GOC:ai]	2'-5'-oligoadenylate synthetase 2	2'-5'-oligoadenylate synthetase activity
ENST00000330714	MX2	1.74619e-58	2.27887e-55	7.18619	0.445699	3.61053	14.8675	0.115808	0.778104	0.0985259	0.778104	ENSG00000183486	MX2	1321.06	GO:0046822	regulation of nucleocytoplasmic transport	Any process that modulates the frequency, rate or extent of the directed movement of substances between the nucleus and the cytoplasm. [GOC:bf]	MX dynamin-like GTPase 2	GTP binding
ENST00000306602	CXCL10	4.75246e-48	4.44109e-45	6.99601	0.48036	4.06378	14.4388	0.0264783	1.01188	0.0598922	1.01188	ENSG00000169245	CXCL10	1092.27	GO:1901509	regulation of endothelial tube morphogenesis	Any process that modulates the frequency, rate or extent of endothelial tube morphogenesis. [GOC:dph, GOC:TermGenie]	chemokine (C-X-C motif) ligand 10	G-protein coupled receptor signaling pathway
ENST00000342315	OAS2	7.13274e-93	4.49916e-89	6.93669	0.339341	2.95811	13.0188	0.308427	-0.012385	0.20976	0.20976	ENSG00000111335	OAS2	1029.35	GO:0018377	protein myristoylation	The covalent attachment of a myristoyl group to a protein. [GOC:ai]	2'-5'-oligoadenylate synthetase 2	2'-5'-oligoadenylate synthetase activity
ENST00000382040	RSAD2	2.93248e-49	2.88271e-46	6.74338	0.457078	5.77975	13.6807	0.119543	0.820597	0.0193171	0.820597	ENSG00000134321	RSAD2	848.42	GO:0003824	catalytic activity	Catalysis of a biochemical reaction at physiological temperatures. In biologically catalyzed reactions, the reactants are known as substrates, and the catalysts are naturally occurring macromolecular substances known as enzymes. Enzymes possess specific binding sites for substrates, and are usually composed wholly or largely of protein, but RNA that has catalytic activity (ribozyme) is often also…	radical S-adenosyl methionine domain containing 2
ENST00000452357	OAS1	1.18733e-58	1.60487e-55	6.68342	0.413904	4.28937	12.8295	0.169294	0.601631	0.0473069	0.601631	ENSG00000089127	OAS1	799.044	GO:0060700	regulation of ribonuclease activity	Any process that modulates the rate, frequency, or extent of ribonuclease activity, catalysis of the hydrolysis of phosphodiester bonds in chains of RNA. [GOC:dph, GOC:tb]	2'-5'-oligoadenylate synthetase 1	glucose homeostasis
ENST00000339275	OASL	1.02814e-33	4.9255e-31	6.65443	0.549853	3.85485	13.2106	0.336987	1.02353	0.0749454	1.02353	ENSG00000135114	OASL	776.213	GO:0046966	thyroid hormone receptor binding	Interacting selectively and non-covalently with a thyroid hormone receptor. [GOC:ai]	2'-5'-oligoadenylate synthetase-like
ENST00000301887	BATF2	5.86323e-33	2.62607e-30	6.5656	0.549033	3.20749	13.0773	0.110809	1.24566	0.160794	1.24566	ENSG00000168062	BATF2	710.235	GO:0042832	defense response to protozoan	Reactions triggered in response to the presence of a protozoan that act to protect the cell or organism. [GOC:jl]	basic leucine zipper transcription factor, ATF-like 2
ENST00000202917	OAS1	5.50968e-34	2.72578e-31	6.54701	0.538702	4.8779	13.6875	0.278008	1.02789	0.0284253	1.02789	ENSG00000089127	OAS1	697.158	GO:0060700	regulation of ribonuclease activity	Any process that modulates the rate, frequency, or extent of ribonuclease activity, catalysis of the hydrolysis of phosphodiester bonds in chains of RNA. [GOC:dph, GOC:tb]	2'-5'-oligoadenylate synthetase 1	glucose homeostasis
ENST00000548941	OAS2	8.78659e-81	3.02311e-77	6.4109	0.336799	2.76593	11.4225	0.0861807	0.424272	0.252095	0.424272	ENSG00000111335	OAS2	608.443	GO:0018377	protein myristoylation	The covalent attachment of a myristoyl group to a protein. [GOC:ai]	2'-5'-oligoadenylate synthetase 2	2'-5'-oligoadenylate synthetase activity
ENST00000306621	CXCL11	6.17909e-58	7.79523e-55	6.3828	0.397802	3.64233	11.9522	0.0549059	0.657204	0.0948671	0.657204	ENSG00000169248	CXCL11	591.584	GO:0051281	positive regulation of release of sequestered calcium ion into cytosol	Any process that activates or increases the frequency, rate or extent of the release into the cytosolic compartment of calcium ions sequestered in the endoplasmic reticulum or mitochondria. [GOC:ai]	chemokine (C-X-C motif) ligand 11	T cell chemotaxis
ENST00000478738	CMPK2	1.88113e-54	2.1574e-51	6.28885	0.404707	4.83483	11.7788	0.290776	0.446268	0.0292389	0.446268	ENSG00000134326	CMPK2	538.533	GO:0033862	UMP kinase activity	Catalysis of the reaction: ATP + UMP = ADP + UDP. [EC:2.7.4.22]	cytidine monophosphate (UMP-CMP) kinase 2, mitochondrial
ENST00000553152	OAS1	3.00237e-47	2.77145e-44	6.28157	0.435085	3.97218	11.5025	0.0918642	0.75998	0.0660612	0.75998	ENSG00000089127	OAS1	534.626	GO:0060700	regulation of ribonuclease activity	Any process that modulates the rate, frequency, or extent of ribonuclease activity, catalysis of the hydrolysis of phosphodiester bonds in chains of RNA. [GOC:dph, GOC:tb]	2'-5'-oligoadenylate synthetase 1	glucose homeostasis
ENST00000380232	IFNB1	2.61842e-70	5.82929e-67	6.28057	0.354304	2.96758	11.0122	0.0462926	0.518599	0.207849	0.518599	ENSG00000171855	IFNB1	534.094	GO:2001235	positive regulation of apoptotic signaling pathway	Any process that activates or increases the frequency, rate or extent of apoptotic signaling pathway. [GOC:mtg_apoptosis]	interferon, beta 1, fibroblast	B cell activation involved in immune response
ENST00000256722	CMPK2	1.20154e-80	3.95427e-77	6.06445	0.318873	3.45325	11.0116	0.33577	0.121791	0.11943	0.121791	ENSG00000134326	CMPK2	430.288	GO:0033862	UMP kinase activity	Catalysis of the reaction: ATP + UMP = ADP + UDP. [EC:2.7.4.22]	cytidine monophosphate (UMP-CMP) kinase 2, mitochondrial
ENST00000264888	CXCL9	3.07596e-51	3.27928e-48	6.00178	0.398587	3.21433	10.3621	0.0490618	0.665862	0.159521	0.665862	ENSG00000138755	CXCL9	404.149	GO:0006968	cellular defense response	A defense response that is mediated by cells. [GOC:ebc]	chemokine (C-X-C motif) ligand 9
ENST00000620239	OASL	5.67116e-28	1.89941e-25	5.96588	0.544117	3.50109	10.7109	0.457553	0.874729	0.112579	0.874729	ENSG00000135114	OASL	389.896	GO:0046966	thyroid hormone receptor binding	Interacting selectively and non-covalently with a thyroid hormone receptor. [GOC:ai]	2'-5'-oligoadenylate synthetase-like
ENST00000549820	OAS1	2.48224e-45	2.0647e-42	5.92249	0.419144	2.58803	10.1123	0.0936246	0.696941	0.297509	0.696941	ENSG00000089127	OAS1	373.34	GO:0060700	regulation of ribonuclease activity	Any process that modulates the rate, frequency, or extent of ribonuclease activity, catalysis of the hydrolysis of phosphodiester bonds in chains of RNA. [GOC:dph, GOC:tb]	2'-5'-oligoadenylate synthetase 1	glucose homeostasis
ENST00000398598	MX1	9.50205e-62	1.41027e-58	5.802	0.34991	7.59062	9.50739	0.221491	0.329477	0.0125158	0.329477	ENSG00000157601	MX1	330.96	GO:0034340	response to type I interferon	Any process that results in a change in state or activity of a cell or an organism (in terms of movement, secretion, enzyme production, gene expression, etc.) as a result of a type I interferon stimulus. Type I interferons include the interferon-alpha, beta, delta, episilon, zeta, kappa, tau, and omega gene families. [GOC:add, ISBN:0126896631, PMID:15546383, PMID:16681834]	MX dynamin-like GTPase 1	cellular response to virus
ENST00000613997	IFI27	1.25061e-44	9.86064e-42	5.78171	0.412519	4.28462	10.3584	0.246896	0.518876	0.0475362	0.518876	ENSG00000275214	IFI27	324.314	GO:0016021	integral component of membrane	The component of a membrane consisting of the gene products and protein complexes having at least some part of their peptide sequence embedded in the hydrophobic region of the membrane. [GOC:dos, GOC:go_curators]	interferon, alpha-inducible protein 27
ENST00000621160	IFI27	1.25061e-44	9.86064e-42	5.78171	0.412519	4.28462	10.3584	0.246896	0.518876	0.0475362	0.518876	ENSG00000165949	IFI27	324.314	GO:0016021	integral component of membrane	The component of a membrane consisting of the gene products and protein complexes having at least some part of their peptide sequence embedded in the hydrophobic region of the membrane. [GOC:dos, GOC:go_curators]	interferon, alpha-inducible protein 27
ENST00000257570	OASL	5.29363e-70	1.14483e-66	5.74541	0.32484	5.45681	9.47021	0.172796	0.30205	0.0218505	0.30205	ENSG00000135114	OASL	312.752	GO:0046966	thyroid hormone receptor binding	Interacting selectively and non-covalently with a thyroid hormone receptor. [GOC:ai]	2'-5'-oligoadenylate synthetase-like
ENST00000476876	IFI44L	1.66421e-51	1.82563e-48	5.69705	0.377333	4.3647	10.9525	0.309494	0.331218	0.0438538	0.331218	ENSG00000137959	IFI44L	297.988	GO:0005654	nucleoplasm	That part of the nuclear content other than the chromosomes or the nucleolus. [GOC:ma, ISBN:0124325653]	interferon induced protein 44 like
ENST00000618200	IFI27	3.43354e-32	1.43588e-29	5.64552	0.477997	4.04293	10.1337	0.175987	0.852177	0.0612397	0.852177	ENSG00000165949	IFI27	283.02	GO:0016021	integral component of membrane	The component of a membrane consisting of the gene products and protein complexes having at least some part of their peptide sequence embedded in the hydrophobic region of the membrane. [GOC:dos, GOC:go_curators]	interferon, alpha-inducible protein 27
ENST00000228928	OAS3	6.94977e-90	4.04653e-86	5.61121	0.279123	7.48373	8.78541	0.00701538	0.343578	0.0126653	0.343578	ENSG00000111331	OAS3	273.474	GO:0060700	regulation of ribonuclease activity	Any process that modulates the rate, frequency, or extent of ribonuclease activity, catalysis of the hydrolysis of phosphodiester bonds in chains of RNA. [GOC:dph, GOC:tb]	2'-5'-oligoadenylate synthetase 3
ENST00000608478	FGF2	5.46167e-22	1.28388e-19	5.60085	0.58105	2.94926	10.2977	0.934258	0.585028	0.211561	0.585028	ENSG00000138685	FGF2	270.657	GO:0014843	growth factor dependent regulation of skeletal muscle satellite cell proliferation	Any process that modulates the frequency, rate or extent of satellite cell proliferation; dependent on specific growth factor activity such as fibroblast growth factors and transforming growth factor beta. [GOC:ef, GOC:mtg_muscle, PMID:16607119]	fibroblast growth factor 2 (basic)	growth factor dependent regulation of skeletal muscle satellite cell proliferation
ENST00000370751	IFI44L	4.09374e-68	7.74668e-65	5.49603	0.315137	6.6859	9.63811	0.0705956	0.376306	0.0145508	0.376306	ENSG00000137959	IFI44L	243.721	GO:0005654	nucleoplasm	That part of the nuclear content other than the chromosomes or the nucleolus. [GOC:ma, ISBN:0124325653]	interferon induced protein 44 like
ENST00000445409	OAS1	1.29051e-29	4.69629e-27	5.41962	0.479551	3.28574	8.75571	0.477848	0.557012	0.146601	0.557012	ENSG00000089127	OAS1	225.794	GO:0060700	regulation of ribonuclease activity	Any process that modulates the rate, frequency, or extent of ribonuclease activity, catalysis of the hydrolysis of phosphodiester bonds in chains of RNA. [GOC:dph, GOC:tb]	2'-5'-oligoadenylate synthetase 1	glucose homeostasis
ENST00000613606	CCL5	1.43777e-28	5.01517e-26	5.37816	0.485052	5.14262	8.62955	0.27988	0.778859	0.024683	0.778859	ENSG00000274233	CCL5	216.623	GO:0046817	chemokine receptor antagonist activity	Interacts with chemokine receptors to reduce the action of a chemokine. [GOC:ai, ISBN:0781718325]	chemokine (C-C motif) ligand 5	MAPK cascade
ENST00000549918	OAS3	1.35384e-42	9.66757e-40	5.37286	0.392779	2.54281	8.33602	0.253445	0.440794	0.310022	0.440794	ENSG00000111331	OAS3	215.477	GO:0060700	regulation of ribonuclease activity	Any process that modulates the rate, frequency, or extent of ribonuclease activity, catalysis of the hydrolysis of phosphodiester bonds in chains of RNA. [GOC:dph, GOC:tb]	2'-5'-oligoadenylate synthetase 3
ENST00000424365	MX1	1.27442e-30	4.92166e-28	5.36113	0.466065	1.98742	8.18099	0.480056	-0.084337	0.497418	0.497418	ENSG00000157601	MX1	212.966	GO:0034340	response to type I interferon	Any process that results in a change in state or activity of a cell or an organism (in terms of movement, secretion, enzyme production, gene expression, etc.) as a result of a type I interferon stimulus. Type I interferons include the interferon-alpha, beta, delta, episilon, zeta, kappa, tau, and omega gene families. [GOC:add, ISBN:0126896631, PMID:15546383, PMID:16681834]	MX dynamin-like GTPase 1	cellular response to virus
ENST00000615978	IFI27	2.76426e-69	5.50619e-66	5.33093	0.303006	3.28745	9.6563	0.196158	0.216999	0.146301	0.216999	ENSG00000275214	IFI27	206.63	GO:0016021	integral component of membrane	The component of a membrane consisting of the gene products and protein complexes having at least some part of their peptide sequence embedded in the hydrophobic region of the membrane. [GOC:dos, GOC:go_curators]	interferon, alpha-inducible protein 27
ENST00000618863	IFI27	2.76426e-69	5.50619e-66	5.33093	0.303006	3.28745	9.6563	0.196158	0.216999	0.146301	0.216999	ENSG00000165949	IFI27	206.63	GO:0016021	integral component of membrane	The component of a membrane consisting of the gene products and protein complexes having at least some part of their peptide sequence embedded in the hydrophobic region of the membrane. [GOC:dos, GOC:go_curators]	interferon, alpha-inducible protein 27
ENST00000339145	IFI6	1.58477e-21	3.63503e-19	5.33022	0.559356	4.33698	9.39501	0.472025	0.935929	0.0450836	0.935929	ENSG00000126709	IFI6	206.483	GO:0051902	negative regulation of mitochondrial depolarization	Any process that stops, prevents, or reduces the frequency, rate or extent of the change in the membrane potential of the mitochondria from negative to positive. [GOC:ai]	interferon, alpha-inducible protein 6	negative regulation of cysteine-type endopeptidase activity involved in apoptotic process
ENST00000380265	HERC6	5.5721e-25	1.56211e-22	5.32221	0.515591	2.63798	8.70237	0.516384	0.679869	0.284143	0.679869	ENSG00000138642	HERC6	204.837	GO:0042787	protein ubiquitination involved in ubiquitin-dependent protein catabolic process	The process in which a ubiquitin group, or multiple groups, are covalently attached to the target protein, thereby initiating the degradation of that protein. [GOC:go_curators]	HECT and RLD domain containing E3 ubiquitin protein ligase family member 6
ENST00000397279	APOL1	1.4033e-36	7.64174e-34	5.27928	0.417923	2.53279	9.26656	0.47312	0.145065	0.312848	0.312848	ENSG00000100342	APOL1	196.228	GO:0034361	very-low-density lipoprotein particle	A triglyceride-rich lipoprotein particle that is typically composed of APOB100, APOE and APOCs and has a density of about 1.006 g/ml and a diameter of between 20-80 nm. It is found in blood and transports endogenous products (newly synthesized cholesterol and triglycerides) from the liver. [GOC:BHF, GOC:expert_pt, GOC:mah, GOC:rl]	apolipoprotein L1	Sporadic idiopathic steroid-resistant nephrotic syndrome with focal segmental hyalinosis
ENST00000396152	NT5C3A	1.56256e-22	3.81531e-20	5.27775	0.540374	2.28672	8.96209	0.440849	0.873171	0.388211	0.873171	ENSG00000122643	NT5C3A	195.928	GO:0008253	5'-nucleotidase activity	Catalysis of the reaction: a 5'-ribonucleotide + H2O = a ribonucleoside + phosphate. [EC:3.1.3.5]	5'-nucleotidase, cytosolic IIIA	Hemolytic anemia due to pyrimidine 5' nucleotidase deficiency
ENST00000252593	BST2	3.3978e-32	1.42883e-29	5.27408	0.446515	6.29978	10.3325	0.145703	0.751487	0.0159422	0.751487	ENSG00000130303	BST2	195.211	GO:1901253	negative regulation of intracellular transport of viral material	Any process that stops, prevents or reduces the frequency, rate or extent of intracellular transport of viral material. [GOC:bf, GOC:jl, GOC:TermGenie]	bone marrow stromal cell antigen 2	cell surface
ENST00000459784	IFI44L	1.44529e-53	1.6088e-50	5.25812	0.341258	2.10714	7.53199	0.0729472	0.147504	0.451111	0.451111	ENSG00000137959	IFI44L	192.121	GO:0005654	nucleoplasm	That part of the nuclear content other than the chromosomes or the nucleolus. [GOC:ma, ISBN:0124325653]	interferon induced protein 44 like
ENST00000408968	IFITM1	5.09287e-39	3.1341e-36	5.25764	0.402364	7.30745	9.33748	0.703275	0.0252617	0.0129697	0.0252617	ENSG00000185885	IFITM1	192.027	GO:0035455	response to interferon-alpha	Any process that results in a change in state or activity of a cell or an organism (in terms of movement, secretion, enzyme production, gene expression, etc.) as a result of an interferon-alpha stimulus. Interferon-alpha is a type I interferon. [GOC:sl, PMID:11356686]	interferon induced transmembrane protein 1	negative regulation of cell migration
ENST00000491110	MX1	4.46636e-48	4.2259e-45	5.1997	0.356918	2.07054	7.29095	0.108359	0.0435585	0.464897	0.464897	ENSG00000157601	MX1	181.217	GO:0034340	response to type I interferon	Any process that results in a change in state or activity of a cell or an organism (in terms of movement, secretion, enzyme production, gene expression, etc.) as a result of a type I interferon stimulus. Type I interferons include the interferon-alpha, beta, delta, episilon, zeta, kappa, tau, and omega gene families. [GOC:add, ISBN:0126896631, PMID:15546383, PMID:16681834]	MX dynamin-like GTPase 1	cellular response to virus
ENST00000367535	NCF2	7.35717e-36	3.92173e-33	5.15468	0.412336	1.88419	7.13114	0.224935	-0.140739	0.540161	0.540161	ENSG00000116701	NCF2	173.241	GO:0032010	phagolysosome	A membrane-bounded intracellular vesicle formed by maturation of an early phagosome following the ingestion of particulate material by phagocytosis; during maturation, phagosomes acquire markers of late endosomes and lysosomes. [GOC:mah, PMID:12388753]	neutrophil cytosolic factor 2	Chronic granulomatous disease
ENST00000605509	CCL5	1.6045e-39	1.02058e-36	5.15133	0.391604	1.88252	7.09089	0.149216	-0.0893192	0.540875	0.540875	ENSG00000271503	CCL5	172.661	GO:0046817	chemokine receptor antagonist activity	Interacts with chemokine receptors to reduce the action of a chemokine. [GOC:ai, ISBN:0781718325]	chemokine (C-C motif) ligand 5	MAPK cascade
ENST00000333625	IFNL1	9.55189e-55	1.1297e-51	5.06573	0.325088	2.22139	7.14561	0.065378	0.3123	0.410192	0.410192	ENSG00000182393	IFNL1	158.496	GO:0043381	negative regulation of memory T cell differentiation	Any process that stops, prevents, or reduces the rate of memory T cell differentiation. [ISBN:0781735149]	interferon, lambda 1
ENST00000554772	WARS	2.47103e-12	2.01118e-10	5.01293	0.715628	2.47217	12.0798	1.17356	1.131	0.330357	1.131	ENSG00000140105	WARS	150.344	GO:0006436	tryptophanyl-tRNA aminoacylation	The process of coupling tryptophan to tryptophanyl-tRNA, catalyzed by tryptophanyl-tRNA synthetase. In tRNA aminoacylation, the amino acid is first activated by linkage to AMP and then transferred to either the 2'- or the 3'-hydroxyl group of the 3'-adenosine residue of the tRNA. [GOC:mcc, ISBN:0716730510]	tryptophanyl-tRNA synthetase
ENST00000455164	MX1	2.31629e-17	3.50654e-15	5.00946	0.590967	1.81158	7.29313	0.999817	-0.459822	0.571772	0.571772	ENSG00000157601	MX1	149.824	GO:0034340	response to type I interferon	Any process that results in a change in state or activity of a cell or an organism (in terms of movement, secretion, enzyme production, gene expression, etc.) as a result of a type I interferon stimulus. Type I interferons include the interferon-alpha, beta, delta, episilon, zeta, kappa, tau, and omega gene families. [GOC:add, ISBN:0126896631, PMID:15546383, PMID:16681834]	MX dynamin-like GTPase 1	cellular response to virus
ENST00000550689	OAS1	1.30114e-18	2.26929e-16	4.9523	0.562401	2.22172	7.57603	1.01325	0.205978	0.410078	0.410078	ENSG00000089127	OAS1	141.5	GO:0060700	regulation of ribonuclease activity	Any process that modulates the rate, frequency, or extent of ribonuclease activity, catalysis of the hydrolysis of phosphodiester bonds in chains of RNA. [GOC:dph, GOC:tb]	2'-5'-oligoadenylate synthetase 1	glucose homeostasis
ENST00000313648	LGALS9	1.69322e-25	4.85473e-23	4.8652	0.466181	2.43646	7.36921	0.460302	0.51766	0.340998	0.51766	ENSG00000168961	LGALS9	129.696	GO:2001269	positive regulation of cysteine-type endopeptidase activity involved in apoptotic signaling pathway	Any process that activates or increases the frequency, rate or extent of cysteine-type endopeptidase activity involved in apoptotic signaling pathway. [GOC:mtg_apoptosis]	lectin, galactoside-binding, soluble, 9	cellular response to virus
ENST00000296026	CXCL3	6.33308e-27	1.98909e-24	4.85109	0.451522	3.08453	7.12832	0.0819165	0.835506	0.184495	0.835506	ENSG00000163734	CXCL3	127.88	GO:0045236	CXCR chemokine receptor binding	Interacting selectively and non-covalently with a chemokine receptor in the CXCR family. [GOC:ceb, PMID:11910892]	chemokine (C-X-C motif) ligand 3
ENST00000311177	HOXB9	4.50299e-51	4.73395e-48	4.83264	0.321481	2.64097	6.62364	0.0973947	0.367681	0.283358	0.367681	ENSG00000170689	HOXB9	125.541	GO:0005515	protein binding	Interacting selectively and non-covalently with any protein or protein complex (a complex of two or more proteins that may include other nonprotein molecules). [GOC:go_curators]	homeobox B9	canonical Wnt signaling pathway
ENST00000486275	MX1	1.41198e-40	9.3752e-38	4.83078	0.362212	3.07864	6.78075	0.255432	0.334956	0.185661	0.334956	ENSG00000157601	MX1	125.309	GO:0034340	response to type I interferon	Any process that results in a change in state or activity of a cell or an organism (in terms of movement, secretion, enzyme production, gene expression, etc.) as a result of a type I interferon stimulus. Type I interferons include the interferon-alpha, beta, delta, episilon, zeta, kappa, tau, and omega gene families. [GOC:add, ISBN:0126896631, PMID:15546383, PMID:16681834]	MX dynamin-like GTPase 1	cellular response to virus
ENST00000370459	GBP5	3.2098e-71	7.3624e-68	4.80187	0.269101	3.05151	7.90914	0.134816	0.14572	0.191052	0.191052	ENSG00000154451	GBP5	121.738	GO:0072616	interleukin-18 secretion	The regulated release of interleukin-18 from a cell. [GOC:BHF, GOC:mah, http://www.copewithcytokines.de/cope.cgi?key=interleukins]	guanylate binding protein 5	interleukin-1 beta secretion
ENST00000286380	RAET1L	2.79491e-28	9.57263e-26	4.7957	0.434859	2.55891	7.00171	0.2179	0.63306	0.305521	0.63306	ENSG00000155918	RAET1L	120.989	GO:0046703	natural killer cell lectin-like receptor binding	Interacting selectively and non-covalently with a lectin-like natural killer cell receptor. [GOC:ai]	retinoic acid early transcript 1L
ENST00000467111	LGALS9	5.53717e-32	2.2903e-29	4.78742	0.406729	4.68107	7.01504	0.422722	0.321708	0.0328149	0.321708	ENSG00000168961	LGALS9	119.992	GO:2001269	positive regulation of cysteine-type endopeptidase activity involved in apoptotic signaling pathway	Any process that activates or increases the frequency, rate or extent of cysteine-type endopeptidase activity involved in apoptotic signaling pathway. [GOC:mtg_apoptosis]	lectin, galactoside-binding, soluble, 9	cellular response to virus
ENST00000331982	IFNL2	1.98608e-21	4.52809e-19	4.77986	0.502839	2.03146	7.52304	0.0164187	1.12139	0.479974	1.12139	ENSG00000183709	IFNL2	119.088	GO:0002385	mucosal immune response	An immune response taking place in mucosal tissues, including those of the intestinal tract, nasal and upper respiratory tract, and genital tract. [GO_REF:0000022, GOC:jal, GOC:mtg_15nov05, ISBN:0781735149]	interferon, lambda 2
ENST00000476521	IFI44L	4.07974e-45	3.32051e-42	4.73561	0.335979	3.38655	7.72056	0.290104	0.217865	0.129676	0.217865	ENSG00000137959	IFI44L	113.933	GO:0005654	nucleoplasm	That part of the nuclear content other than the chromosomes or the nucleolus. [GOC:ma, ISBN:0124325653]	interferon induced protein 44 like
ENST00000474002	IFI44L	5.4183e-44	4.22812e-41	4.72278	0.339495	2.2753	6.24473	0.126677	0.193023	0.39198	0.39198	ENSG00000137959	IFI44L	112.48	GO:0005654	nucleoplasm	That part of the nuclear content other than the chromosomes or the nucleolus. [GOC:ma, ISBN:0124325653]	interferon induced protein 44 like
ENST00000367536	NCF2	6.5665e-11	4.28112e-09	4.70609	0.720661	2.8345	7.92495	0.429007	1.90808	0.236202	1.90808	ENSG00000116701	NCF2	110.618	GO:0032010	phagolysosome	A membrane-bounded intracellular vesicle formed by maturation of an early phagosome following the ingestion of particulate material by phagocytosis; during maturation, phagosomes acquire markers of late endosomes and lysosomes. [GOC:mah, PMID:12388753]	neutrophil cytosolic factor 2	Chronic granulomatous disease
ENST00000259030	RTP4	2.18305e-38	1.33259e-35	4.69038	0.362034	3.24411	7.45848	0.145981	0.443827	0.154048	0.443827	ENSG00000136514	RTP4	108.894	GO:0031849	olfactory receptor binding	Interacting selectively and non-covalently with an olfactory receptor. [GOC:mah, GOC:nln]	receptor (chemosensory) transporter protein 4
ENST00000371804	IFIT1	1.47561e-107	1.11694e-103	4.67463	0.212191	8.02266	6.36795	0.00285437	0.199758	0.01217	0.199758	ENSG00000185745	IFIT1	107.193	GO:0071357	cellular response to type I interferon	Any process that results in a change in state or activity of a cell (in terms of movement, secretion, enzyme production, gene expression, etc.) as a result of a type I interferon stimulus. Type I interferons include the interferon-alpha, beta, delta, episilon, zeta, kappa, tau, and omega gene families. [GOC:mah, PR:000025848]	interferon induced protein with tetratricopeptide repeats 1	negative regulation of viral genome replication
ENST00000367341	RAET1L	1.00626e-49	1.01556e-46	4.64463	0.313292	3.81905	6.53029	0.233032	0.208652	0.0778859	0.208652	ENSG00000155918	RAET1L	104.025	GO:0046703	natural killer cell lectin-like receptor binding	Interacting selectively and non-covalently with a lectin-like natural killer cell receptor. [GOC:ai]	retinoic acid early transcript 1L
ENST00000560741	ISG20	3.60963e-56	4.40683e-53	4.63222	0.293352	3.84832	6.3917	0.311776	-0.0554833	0.0754733	0.0754733	ENSG00000172183	ISG20	102.741	GO:0008859	exoribonuclease II activity	Catalysis of the reaction: RNA + H2O = 5'-phosphomononucleotides. Cleaves RNA in the 3' to 5' direction. [EC:3.1.13.1, ISBN:0198547684]	interferon stimulated exonuclease gene 20kDa	defense response to virus
ENST00000264350	HERC5	7.68405e-75	2.15418e-71	4.6162	0.252196	5.78738	6.76451	0.26696	-0.0256001	0.0192522	0.0192522	ENSG00000138646	HERC5	101.109	GO:0042296	ISG15 transferase activity	Catalysis of the transfer of ISG15 from one protein to another via the reaction X-ISG15 + Y --> Y-ISG15 + X, where both X-ISG15 and Y-ISG15 are covalent linkages. [GOC:mah, PMID:12826404]	HECT and RLD domain containing E3 ubiquitin protein ligase 5
ENST00000603197	CCL5	1.05866e-19	1.99833e-17	4.60795	0.50733	1.88156	6.00897	0.616939	-0.182739	0.541286	0.541286	ENSG00000271503	CCL5	100.278	GO:0046817	chemokine receptor antagonist activity	Interacts with chemokine receptors to reduce the action of a chemokine. [GOC:ai, ISBN:0781718325]	chemokine (C-C motif) ligand 5	MAPK cascade
ENST00000553185	OAS1	1.41303e-37	8.04187e-35	4.59455	0.358626	2.13128	6.20787	0.136557	0.18051	0.4422	0.4422	ENSG00000089127	OAS1	98.9437	GO:0060700	regulation of ribonuclease activity	Any process that modulates the rate, frequency, or extent of ribonuclease activity, catalysis of the hydrolysis of phosphodiester bonds in chains of RNA. [GOC:dph, GOC:tb]	2'-5'-oligoadenylate synthetase 1	glucose homeostasis
ENST00000403974	PMS2CL	2.36848e-16	3.23605e-14	4.57002	0.557198	1.59186	5.66106	0.721992	-0.57295	0.675122	0.675122	ENSG00000187953	PMS2CL	96.5459
ENST00000494910	IFI44L	3.01128e-38	1.80899e-35	4.56291	0.352868	2.44876	5.9507	0.223017	0.257094	0.337304	0.337304	ENSG00000137959	IFI44L	95.8622	GO:0005654	nucleoplasm	That part of the nuclear content other than the chromosomes or the nucleolus. [GOC:ma, ISBN:0124325653]	interferon induced protein 44 like
ENST00000371811	IFIT3	4.76258e-40	3.08114e-37	4.55993	0.344251	6.94961	5.996	0.290007	0.243283	0.0138169	0.243283	ENSG00000119917	IFIT3	95.5768	GO:0060337	type I interferon signaling pathway	A series of molecular signals initiated by the binding of a type I interferon to a receptor on the surface of a cell, and ending with regulation of a downstream cellular process, e.g. transcription. Type I interferons include the interferon-alpha, beta, delta, episilon, zeta, kappa, tau, and omega gene families. [GOC:add, GOC:dph, GOC:signaling, PR:000025848]	interferon induced protein with tetratricopeptide repeats 3	cellular response to virus
ENST00000448970	LGALS9	1.67644e-24	4.53196e-22	4.55514	0.44587	2.52619	6.40067	0.57988	0.241623	0.314721	0.314721	ENSG00000168961	LGALS9	95.1198	GO:2001269	positive regulation of cysteine-type endopeptidase activity involved in apoptotic signaling pathway	Any process that activates or increases the frequency, rate or extent of cysteine-type endopeptidase activity involved in apoptotic signaling pathway. [GOC:mtg_apoptosis]	lectin, galactoside-binding, soluble, 9	cellular response to virus
ENST00000313640	EPSTI1	1.9122e-13	1.81152e-11	4.50136	0.61203	2.68458	6.89456	0.286014	1.3996	0.272107	1.3996	ENSG00000133106	EPSTI1	90.1395				epithelial stromal interaction 1 (breast)
ENST00000371110	PIK3AP1	3.79332e-35	1.98019e-32	4.45715	0.360316	2.57966	6.1334	0.28443	0.156469	0.299794	0.299794	ENSG00000155629	PIK3AP1	86.2411	GO:0034154	toll-like receptor 7 signaling pathway	Any series of molecular signals generated as a consequence of binding to toll-like receptor 7. [GOC:add, PMID:16551253, PMID:17328678]	phosphoinositide-3-kinase adaptor protein 1
ENST00000472581	CFB	4.28958e-27	1.35854e-24	4.44027	0.411907	2.32323	5.96365	0.0919778	0.671527	0.376319	0.671527	ENSG00000243649	CFB	84.7976				complement factor B	Atypical hemolytic uremic syndrome with B factor anomaly
ENST00000227880	SLC15A3	4.69146e-26	1.42044e-23	4.43539	0.420119	3.68426	7.43529	0.212757	0.581492	0.0903374	0.581492	ENSG00000110446	SLC15A3	84.3851	GO:0006810	transport	The directed movement of substances (such as macromolecules, small molecules, ions) into, out of or within a cell, or between cells, or within a multicellular organism by means of some agent such as a transporter or pore. [GOC:dph, GOC:jl, GOC:mah]	solute carrier family 15 (oligopeptide transporter), member 3
ENST00000486882	IFI44L	1.02998e-81	5.56873e-78	4.42949	0.231344	4.80526	5.6141	0.211	0.0206101	0.0298407	0.0298407	ENSG00000137959	IFI44L	83.889	GO:0005654	nucleoplasm	That part of the nuclear content other than the chromosomes or the nucleolus. [GOC:ma, ISBN:0124325653]	interferon induced protein 44 like
ENST00000508487	CXCL2	2.11727e-50	2.19538e-47	4.42359	0.296298	3.06525	5.48732	0.206748	0.141026	0.188318	0.188318	ENSG00000081041	CXCL2	83.3955	GO:0045236	CXCR chemokine receptor binding	Interacting selectively and non-covalently with a chemokine receptor in the CXCR family. [GOC:ceb, PMID:11910892]	chemokine (C-X-C motif) ligand 2
ENST00000288383	MX1	1.83071e-12	1.51943e-10	4.40929	0.625715	3.82029	6.73339	0.811507	0.950332	0.077782	0.950332	ENSG00000157601	MX1	82.2115	GO:0034340	response to type I interferon	Any process that results in a change in state or activity of a cell or an organism (in terms of movement, secretion, enzyme production, gene expression, etc.) as a result of a type I interferon stimulus. Type I interferons include the interferon-alpha, beta, delta, episilon, zeta, kappa, tau, and omega gene families. [GOC:add, ISBN:0126896631, PMID:15546383, PMID:16681834]	MX dynamin-like GTPase 1	cellular response to virus
ENST00000613087	IFNL3	1.37175e-18	2.38694e-16	4.40716	0.50083	1.84511	6.59075	0.0550472	1.07369	0.557019	1.07369	ENSG00000197110	IFNL3	82.0358	GO:1903955	positive regulation of protein targeting to mitochondrion	Any process that activates or increases the frequency, rate or extent of protein targeting to mitochondrion. [GO_REF:0000058, GOC:pad, GOC:PARL, GOC:TermGenie, PMID:24270810]	interferon, lambda 3	Response to antiviral treatment in hepatitis C
ENST00000404168	CMPK2	2.93607e-31	1.18845e-28	4.39965	0.378335	1.95466	5.63195	0.133419	0.165739	0.5107	0.5107	ENSG00000134326	CMPK2	81.4224	GO:0033862	UMP kinase activity	Catalysis of the reaction: ATP + UMP = ADP + UDP. [EC:2.7.4.22]	cytidine monophosphate (UMP-CMP) kinase 2, mitochondrial
ENST00000527972	SMTNL1	6.11787e-46	5.32276e-43	4.36969	0.307114	2.55467	6.09343	0.117732	0.209172	0.306703	0.306703	ENSG00000214872	SMTNL1	79.0194	GO:0005515	protein binding	Interacting selectively and non-covalently with any protein or protein complex (a complex of two or more proteins that may include other nonprotein molecules). [GOC:go_curators]	smoothelin-like 1
ENST00000527454	BATF2	2.19164e-23	5.60445e-21	4.36054	0.437631	1.48712	5.44021	0.133192	0.186916	0.728652	0.728652	ENSG00000168062	BATF2	78.2991	GO:0042832	defense response to protozoan	Reactions triggered in response to the presence of a protozoan that act to protect the cell or organism. [GOC:jl]	basic leucine zipper transcription factor, ATF-like 2
ENST00000409189	CCL20	1.72769e-28	5.9988e-26	4.34648	0.392588	1.94002	5.63852	0.175193	0.518369	0.516722	0.518369	ENSG00000115009	CCL20	77.2059	GO:2000406	positive regulation of T cell migration	Any process that activates or increases the frequency, rate or extent of T cell migration. [GOC:mah]	chemokine (C-C motif) ligand 20
ENST00000417963	MX1	7.45958e-16	9.60269e-14	4.34408	0.538784	2.17105	5.87145	0.878468	0.0900002	0.427831	0.427831	ENSG00000157601	MX1	77.0215	GO:0034340	response to type I interferon	Any process that results in a change in state or activity of a cell or an organism (in terms of movement, secretion, enzyme production, gene expression, etc.) as a result of a type I interferon stimulus. Type I interferons include the interferon-alpha, beta, delta, episilon, zeta, kappa, tau, and omega gene families. [GOC:add, ISBN:0126896631, PMID:15546383, PMID:16681834]	MX dynamin-like GTPase 1	cellular response to virus
ENST00000467790	IFI44	9.34433e-16	1.18874e-13	4.32302	0.538012	3.40209	6.20956	0.612803	0.689754	0.127218	0.689754	ENSG00000137965	IFI44	75.4163	GO:0009615	response to virus	Any process that results in a change in state or activity of a cell or an organism (in terms of movement, secretion, enzyme production, gene expression, etc.) as a result of a stimulus from a virus. [GOC:hb]	interferon induced protein 44
ENST00000328306	SLC9A7	1.13492e-08	5.02076e-07	4.32208	0.757034	2.55686	7.52059	0.885612	1.69334	0.306093	1.69334	ENSG00000065923	SLC9A7	75.3452	GO:0015386	potassium:proton antiporter activity	Catalysis of the transfer of a solute or solutes from one side of a membrane to the other according to the reaction: K+(in) + H+(out) = K+(out) + H+(in). [TC:2.A.37.-.-]	solute carrier family 9, subfamily A (NHE7, cation proton antiporter 7), member 7
ENST00000328221	IFITM1	5.99037e-07	1.75053e-05	4.30004	0.861468	2.14211	6.20316	2.90133	-2.37133	0.438247	0.438247	ENSG00000185885	IFITM1	73.7029	GO:0035455	response to interferon-alpha	Any process that results in a change in state or activity of a cell or an organism (in terms of movement, secretion, enzyme production, gene expression, etc.) as a result of an interferon-alpha stimulus. Interferon-alpha is a type I interferon. [GOC:sl, PMID:11356686]	interferon induced transmembrane protein 1	negative regulation of cell migration
ENST00000451794	NEURL3	3.34533e-21	7.46956e-19	4.27744	0.452575	2.83712	5.8774	0.43497	0.486741	0.235611	0.486741	ENSG00000163121	NEURL3	72.0559	GO:0005515	protein binding	Interacting selectively and non-covalently with any protein or protein complex (a complex of two or more proteins that may include other nonprotein molecules). [GOC:go_curators]	neuralized E3 ubiquitin protein ligase 3
ENST00000559876	ISG20	1.91986e-19	3.57052e-17	4.2656	0.473023	1.92106	6.01874	0.482278	0.133844	0.524598	0.524598	ENSG00000172183	ISG20	71.2077	GO:0008859	exoribonuclease II activity	Catalysis of the reaction: RNA + H2O = 5'-phosphomononucleotides. Cleaves RNA in the 3' to 5' direction. [EC:3.1.13.1, ISBN:0198547684]	interferon stimulated exonuclease gene 20kDa	defense response to virus
ENST00000359709	IFI16	1.01505e-13	9.99118e-12	4.264	0.5732	1.83338	5.65605	0.916363	-0.114247	0.56215	0.56215	ENSG00000163565	IFI16	71.0935				interferon, gamma-inducible protein 16	activation of cysteine-type endopeptidase activity
ENST00000576724	XAF1	2.76911e-13	2.53449e-11	4.26367	0.583651	2.35409	6.25715	0.29026	1.24266	0.366457	1.24266	ENSG00000132530	XAF1	71.0702	GO:0005515	protein binding	Interacting selectively and non-covalently with any protein or protein complex (a complex of two or more proteins that may include other nonprotein molecules). [GOC:go_curators]	XIAP associated factor 1
ENST00000464547	ATF3	3.27292e-24	8.66213e-22	4.24321	0.418	1.68391	5.44082	0.155866	0.337658	0.630392	0.630392	ENSG00000162772	ATF3	69.6307	GO:0043565	sequence-specific DNA binding	Interacting selectively and non-covalently with DNA of a specific nucleotide composition, e.g. GC-rich DNA binding, or with a specific sequence motif or type of DNA e.g. promotor binding or rDNA binding. [GOC:jl]	activating transcription factor 3	positive regulation of TRAIL-activated apoptotic signaling pathway
ENST00000361157	IFI6	2.37046e-242	1.79427e-237	4.23467	0.127376	7.81019	5.36564	0.00599371	0.067017	0.0122891	0.067017	ENSG00000126709	IFI6	69.0392	GO:0051902	negative regulation of mitochondrial depolarization	Any process that stops, prevents, or reduces the frequency, rate or extent of the change in the membrane potential of the mitochondria from negative to positive. [GOC:ai]	interferon, alpha-inducible protein 6	negative regulation of cysteine-type endopeptidase activity involved in apoptotic process
ENST00000489749	RSAD2	5.5984e-24	1.46124e-21	4.20934	0.41682	1.57332	5.10059	0.0974351	0.258811	0.684391	0.684391	ENSG00000134321	RSAD2	67.3121	GO:0003824	catalytic activity	Catalysis of a biochemical reaction at physiological temperatures. In biologically catalyzed reactions, the reactants are known as substrates, and the catalysts are naturally occurring macromolecular substances known as enzymes. Enzymes possess specific binding sites for substrates, and are usually composed wholly or largely of protein, but RNA that has catalytic activity (ribozyme) is often also…	radical S-adenosyl methionine domain containing 2
ENST00000604400	HEATR9	1.66081e-24	4.5058e-22	4.18946	0.410041	1.59752	5.03409	0.0842906	0.255004	0.672309	0.672309	ENSG00000270379	HEATR9	65.9873	GO:0005488	binding	The selective, non-covalent, often stoichiometric, interaction of a molecule with one or more specific sites on another molecule. [GOC:ceb, GOC:mah, ISBN:0198506732]	HEAT repeat containing 9
ENST00000556504	WARS	5.53938e-08	2.07468e-06	4.16962	0.767453	2.30496	10.2482	1.32892	1.32151	0.382241	1.32151	ENSG00000140105	WARS	64.691	GO:0006436	tryptophanyl-tRNA aminoacylation	The process of coupling tryptophan to tryptophanyl-tRNA, catalyzed by tryptophanyl-tRNA synthetase. In tRNA aminoacylation, the amino acid is first activated by linkage to AMP and then transferred to either the 2'- or the 3'-hydroxyl group of the 3'-adenosine residue of the tRNA. [GOC:mcc, ISBN:0716730510]	tryptophanyl-tRNA synthetase
ENST00000478268	MX1	4.66417e-41	3.18058e-38	4.16143	0.310109	3.34572	4.9881	0.218595	0.21416	0.136331	0.21416	ENSG00000157601	MX1	64.1635	GO:0034340	response to type I interferon	Any process that results in a change in state or activity of a cell or an organism (in terms of movement, secretion, enzyme production, gene expression, etc.) as a result of a type I interferon stimulus. Type I interferons include the interferon-alpha, beta, delta, episilon, zeta, kappa, tau, and omega gene families. [GOC:add, ISBN:0126896631, PMID:15546383, PMID:16681834]	MX dynamin-like GTPase 1	cellular response to virus
ENST00000262623	ATP4A	2.40653e-28	8.2799e-26	4.15533	0.376333	1.90838	5.04384	0.107407	0.428512	0.529914	0.529914	ENSG00000105675	ATP4A	63.7731	GO:0008900	hydrogen:potassium-exchanging ATPase activity	Catalysis of the transfer of a solute or solutes from one side of a membrane to the other according to the reaction: ATP + H2O + H+(in) + K+(out) = ADP + phosphate + H+(out) + K+(in). [EC:3.6.3.10]	ATPase, H+/K+ exchanging, alpha polypeptide
ENST00000306072	ISG20	1.77577e-20	3.61327e-18	4.14519	0.44692	2.86872	5.76945	0.285671	0.613146	0.228598	0.613146	ENSG00000172183	ISG20	63.1298	GO:0008859	exoribonuclease II activity	Catalysis of the reaction: RNA + H2O = 5'-phosphomononucleotides. Cleaves RNA in the 3' to 5' direction. [EC:3.1.13.1, ISBN:0198547684]	interferon stimulated exonuclease gene 20kDa	defense response to virus
ENST00000399205	SETD4	2.13891e-10	1.27985e-08	4.14284	0.652311	1.98014	5.47533	1.41445	-0.648363	0.500348	0.500348	ENSG00000185917	SETD4	62.9815	GO:0018026	peptidyl-lysine monomethylation	The methylation of peptidyl-lysine to form peptidyl-N6-methyl-L-lysine. [RESID:AA0076]	SET domain containing 4
ENST00000618639	CCL5	7.24911e-12	5.47612e-10	4.12944	0.602604	1.60305	6.52489	0.762163	0.871931	0.669572	0.871931	ENSG00000274233	CCL5	62.1432	GO:0046817	chemokine receptor antagonist activity	Interacts with chemokine receptors to reduce the action of a chemokine. [GOC:ai, ISBN:0781718325]	chemokine (C-C motif) ligand 5	MAPK cascade
ENST00000362020	IFI6	1.68715e-73	4.40363e-70	4.12909	0.227686	6.31008	5.08493	0.217388	-0.150786	0.0158965	0.0158965	ENSG00000126709	IFI6	62.1213	GO:0051902	negative regulation of mitochondrial depolarization	Any process that stops, prevents, or reduces the frequency, rate or extent of the change in the membrane potential of the mitochondria from negative to positive. [GOC:ai]	interferon, alpha-inducible protein 6	negative regulation of cysteine-type endopeptidase activity involved in apoptotic process
ENST00000215794	USP18	2.10008e-46	1.84838e-43	4.12593	0.288469	6.27506	4.86624	0.00801846	0.366446	0.0160542	0.366446	ENSG00000184979	USP18	61.9255	GO:0060338	regulation of type I interferon-mediated signaling pathway	Any process that modulates the rate, frequency or extent of a type I interferon-mediated signaling pathway. A type I interferon-mediated signaling pathway is the series of molecular events generated as a consequence of a type I interferon binding to a cell surface receptor. [GOC:dph]	ubiquitin specific peptidase 18
ENST00000426053	APOL1	1.714e-05	0.000343164	4.12011	0.958339	2.40593	8.85935	1.75639	2.37647	0.350288	2.37647	ENSG00000100342	APOL1	61.566	GO:0034361	very-low-density lipoprotein particle	A triglyceride-rich lipoprotein particle that is typically composed of APOB100, APOE and APOCs and has a density of about 1.006 g/ml and a diameter of between 20-80 nm. It is found in blood and transports endogenous products (newly synthesized cholesterol and triglycerides) from the liver. [GOC:BHF, GOC:expert_pt, GOC:mah, GOC:rl]	apolipoprotein L1	Sporadic idiopathic steroid-resistant nephrotic syndrome with focal segmental hyalinosis
ENST00000546973	OAS3	5.04418e-24	1.32114e-21	4.10936	0.406509	2.09164	4.97877	0.286713	0.287646	0.456909	0.456909	ENSG00000111331	OAS3	60.9076	GO:0060700	regulation of ribonuclease activity	Any process that modulates the rate, frequency, or extent of ribonuclease activity, catalysis of the hydrolysis of phosphodiester bonds in chains of RNA. [GOC:dph, GOC:tb]	2'-5'-oligoadenylate synthetase 3
ENST00000300589	NOD2	1.09315e-36	6.03971e-34	4.10904	0.324779	2.56406	4.8335	0.170574	0.24194	0.304091	0.304091	ENSG00000167207	NOD2	60.8882	GO:0042981	regulation of apoptotic process	Any process that modulates the occurrence or rate of cell death by apoptotic process. [GOC:jl, GOC:mtg_apoptosis]	nucleotide binding oligomerization domain containing 2	Behcet disease
ENST00000371818	IFIT3	9.93828e-43	7.30348e-40	4.06952	0.297011	7.31359	5.01768	0.0372014	0.35977	0.0129579	0.35977	ENSG00000119917	IFIT3	58.5287	GO:0060337	type I interferon signaling pathway	A series of molecular signals initiated by the binding of a type I interferon to a receptor on the surface of a cell, and ending with regulation of a downstream cellular process, e.g. transcription. Type I interferons include the interferon-alpha, beta, delta, episilon, zeta, kappa, tau, and omega gene families. [GOC:add, GOC:dph, GOC:signaling, PR:000025848]	interferon induced protein with tetratricopeptide repeats 3	cellular response to virus
ENST00000541505	SLC15A3	8.58287e-23	2.12308e-20	4.06595	0.413738	2.86705	5.84374	0.130977	0.639328	0.228964	0.639328	ENSG00000110446	SLC15A3	58.3205	GO:0006810	transport	The directed movement of substances (such as macromolecules, small molecules, ions) into, out of or within a cell, or between cells, or within a multicellular organism by means of some agent such as a transporter or pore. [GOC:dph, GOC:jl, GOC:mah]	solute carrier family 15 (oligopeptide transporter), member 3
ENST00000490676	HLA-B	2.05376e-11	1.45968e-09	4.06535	0.606574	3.26666	7.1338	0.646628	1.00907	0.149984	1.00907	ENSG00000223532	HLA-B	58.2853	GO:0019882	antigen processing and presentation	The process in which an antigen-presenting cell expresses antigen (peptide or lipid) on its cell surface in association with an MHC protein complex. [GO_REF:0000022, GOC:add, GOC:mtg_15nov05, ISBN:0781735149, PMID:15771591, PMID:15928678]	major histocompatibility complex, class I, B	SEVERE CUTANEOUS ADVERSE REACTION SUSCEPTIBILITY TO TOXIC EPIDERMAL NECROLYSIS SUSCEPTIBILITY TO INCLUDED
ENST00000358813	CCL20	4.01025e-19	7.33207e-17	4.06525	0.454894	2.18637	5.28436	0.221101	0.710079	0.422398	0.710079	ENSG00000115009	CCL20	58.2793	GO:2000406	positive regulation of T cell migration	Any process that activates or increases the frequency, rate or extent of T cell migration. [GOC:mah]	chemokine (C-C motif) ligand 20
ENST00000263642	IFIH1	1.41482e-54	1.64756e-51	4.06203	0.261097	6.75402	4.97058	0.00694113	0.299832	0.0143527	0.299832	ENSG00000115267	IFIH1	58.092	GO:0039530	MDA-5 signaling pathway	Any series of molecular signals generated as a consequence of the cytoplasmic pattern recognition receptor (PRR) MDA-5 (also known as IFIH1) binding to viral RNA. MDA-5 detects RNA synthesized during active viral replication and triggers a signaling pathway to protect the host against viral infection, for example by inducing the expression of antiviral cytokines. [GOC:bf, PMID:19620789]	interferon induced, with helicase C domain 1	Aicardi-Goutieres Syndrome
ENST00000349314	APOL3	5.22267e-11	3.47381e-09	4.05952	0.61841	3.25754	6.11043	0.982047	0.738893	0.151618	0.738893	ENSG00000128284	APOL3	57.9465	GO:0042157	lipoprotein metabolic process	The chemical reactions and pathways involving any conjugated, water-soluble protein in which the nonprotein group consists of a lipid or lipids. [ISBN:0198506732]	apolipoprotein L, 3	positive regulation of I-kappaB kinase/NF-kappaB signaling
ENST00000398938	KCNJ15	1.16604e-17	1.79393e-15	4.05419	0.473828	1.5388	4.85595	0.308426	0.0803339	0.701882	0.701882	ENSG00000157551	KCNJ15	57.6382	GO:0005242	inward rectifier potassium channel activity	Enables the transmembrane transfer of a potassium ion by an inwardly-rectifying voltage-gated channel. An inwardly rectifying current-voltage relation is one where at any given driving force the inward flow of K+ ions exceeds the outward flow for the opposite driving force. The inward-rectification is due to a voltage-dependent block of the channel pore by a specific ligand or ligands, and as a r…	potassium channel, inwardly rectifying subfamily J, member 15
ENST00000493306	KLF4	1.694e-15	2.08156e-13	4.04475	0.508012	2.29531	5.46635	0.563501	0.597843	0.385392	0.597843	ENSG00000136826	KLF4	57.0968	GO:2000342	negative regulation of chemokine (C-X-C motif) ligand 2 production	Any process that stops, prevents or reduces the frequency, rate or extent of chemokine (C-X-C motif) ligand 2 production. [GOC:BHF, GOC:mah]	Kruppel-like factor 4 (gut)	cellular response to laminar fluid shear stress
ENST00000474872	RSAD2	1.47572e-20	3.05197e-18	4.03991	0.434645	1.32681	4.63343	0.0338352	0.163987	0.816287	0.816287	ENSG00000134321	RSAD2	56.8211	GO:0003824	catalytic activity	Catalysis of a biochemical reaction at physiological temperatures. In biologically catalyzed reactions, the reactants are known as substrates, and the catalysts are naturally occurring macromolecular substances known as enzymes. Enzymes possess specific binding sites for substrates, and are usually composed wholly or largely of protein, but RNA that has catalytic activity (ribozyme) is often also…	radical S-adenosyl methionine domain containing 2
ENST00000579930	LGALS9	1.29906e-26	4.0299e-24	4.03821	0.378203	3.51832	4.96423	0.533452	-0.0703051	0.110217	0.110217	ENSG00000168961	LGALS9	56.725	GO:2001269	positive regulation of cysteine-type endopeptidase activity involved in apoptotic signaling pathway	Any process that activates or increases the frequency, rate or extent of cysteine-type endopeptidase activity involved in apoptotic signaling pathway. [GOC:mtg_apoptosis]	lectin, galactoside-binding, soluble, 9	cellular response to virus
ENST00000527414	DICER1	1.32891e-05	0.000274383	4.0275	0.924738	3.80815	8.62695	0.682858	3.16528	0.0788029	3.16528	ENSG00000100697	DICER1	56.1207	GO:0036404	conversion of ds siRNA to ss siRNA	The process in which double-stranded small interfering RNA (ds siRNA) molecules are converted to single-stranded small interfering RNA (ss siRNA). [GOC:vw]	dicer 1, ribonuclease type III	Familial multinodular goiter
ENST00000520177	G3BP1	1.35023e-10	8.39795e-09	4.0114	0.624692	1.71537	5.29685	1.14049	0.034007	0.61559	0.61559	ENSG00000145907	G3BP1	55.2241	GO:0006810	transport	The directed movement of substances (such as macromolecules, small molecules, ions) into, out of or within a cell, or between cells, or within a multicellular organism by means of some agent such as a transporter or pore. [GOC:dph, GOC:jl, GOC:mah]	GTPase activating protein (SH3 domain) binding protein 1
ENST00000611722	IFIT2	1.1815e-74	3.19398e-71	4.00714	0.219202	7.52166	4.77961	0.0196762	0.196547	0.0126093	0.196547	ENSG00000119922	IFIT2	54.9894	GO:0008637	apoptotic mitochondrial changes	The morphological and physiological alterations undergone by mitochondria during apoptosis. [GOC:mah, GOC:mtg_apoptosis]	interferon induced protein with tetratricopeptide repeats 2	cellular response to virus
ENST00000546084	TRAF1	1.18422e-08	5.20844e-07	4.00657	0.702662	2.94752	5.69057	2.00989	-0.440381	0.211916	0.211916	ENSG00000056558	TRAF1	54.9579	GO:2001236	regulation of extrinsic apoptotic signaling pathway	Any process that modulates the frequency, rate or extent of extrinsic apoptotic signaling pathway. [GOC:mtg_apoptosis]	TNF receptor associated factor 1
ENST00000551007	OAS3	3.28292e-33	1.49695e-30	3.99282	0.332554	2.75685	4.88849	0.217721	0.279943	0.254266	0.279943	ENSG00000111331	OAS3	54.2074	GO:0060700	regulation of ribonuclease activity	Any process that modulates the rate, frequency, or extent of ribonuclease activity, catalysis of the hydrolysis of phosphodiester bonds in chains of RNA. [GOC:dph, GOC:tb]	2'-5'-oligoadenylate synthetase 3
ENST00000589527	LGALS3BP	2.30967e-06	5.84702e-05	3.95847	0.837904	2.18691	7.00517	2.2171	0.942273	0.422206	0.942273	ENSG00000108679	LGALS3BP	52.3769	GO:0006898	receptor-mediated endocytosis	An endocytosis process in which cell surface receptors ensure specificity of transport. A specific receptor on the cell surface binds tightly to the extracellular macromolecule (the ligand) that it recognizes; the plasma-membrane region containing the receptor-ligand complex then undergoes endocytosis, forming a transport vesicle containing the receptor-ligand complex and excluding most other pla…	lectin, galactoside-binding, soluble, 3 binding protein
ENST00000417261	CFB	6.82223e-18	1.07359e-15	3.95055	0.458415	3.45153	5.9376	0.808764	0.136886	0.119684	0.136886	ENSG00000239754	CFB	51.9641	GO:0030449	regulation of complement activation	Any process that modulates the frequency, rate or extent of complement activation. [GOC:go_curators]	complement factor B	COMPLEMENT FACTOR B DEFICIENCY
ENST00000424727	CFB	6.82223e-18	1.07359e-15	3.95055	0.458415	3.45153	5.9376	0.808764	0.136886	0.119684	0.136886	ENSG00000243570	CFB	51.9641	GO:0030449	regulation of complement activation	Any process that modulates the frequency, rate or extent of complement activation. [GOC:go_curators]	complement factor B	COMPLEMENT FACTOR B DEFICIENCY
ENST00000426239	CFB	6.82223e-18	1.07359e-15	3.95055	0.458415	3.45153	5.9376	0.808764	0.136886	0.119684	0.136886	ENSG00000242335	CFB	51.9641	GO:0030449	regulation of complement activation	Any process that modulates the frequency, rate or extent of complement activation. [GOC:go_curators]	complement factor B	COMPLEMENT FACTOR B DEFICIENCY
ENST00000455591	CFB	6.82223e-18	1.07359e-15	3.95055	0.458415	3.45153	5.9376	0.808764	0.136886	0.119684	0.136886	ENSG00000241534	CFB	51.9641	GO:0030449	regulation of complement activation	Any process that modulates the frequency, rate or extent of complement activation. [GOC:go_curators]	complement factor B	COMPLEMENT FACTOR B DEFICIENCY
ENST00000449768	OAS2	1.07801e-42	7.84592e-40	3.90116	0.284847	4.11153	4.66837	0.126809	0.238311	0.056929	0.238311	ENSG00000111335	OAS2	49.4597	GO:0018377	protein myristoylation	The covalent attachment of a myristoyl group to a protein. [GOC:ai]	2'-5'-oligoadenylate synthetase 2	2'-5'-oligoadenylate synthetase activity
ENST00000492634	ACTN2	1.18798e-19	2.23132e-17	3.89449	0.429372	1.99091	4.72895	0.333603	0.475617	0.496017	0.496017	ENSG00000077522	ACTN2	49.1308	GO:2001137	positive regulation of endocytic recycling	Any process that activates or increases the frequency, rate or extent of endocytic recycling. [GOC:obol]	actinin, alpha 2	Familial isolated dilated cardiomyopathy
ENST00000292494	LY6E	0.000302596	0.0039737	3.88113	1.07419	4.55657	8.79305	1.69681	3.4957	0.036541	3.4957	ENSG00000160932	LY6E	48.4791				lymphocyte antigen 6 complex, locus E
ENST00000396204	RORB	7.35671e-20	1.41693e-17	3.87883	0.425204	1.97485	5.06822	0.311109	0.283095	0.502484	0.502484	ENSG00000198963	RORB	48.3674	GO:0035881	amacrine cell differentiation	The process in which a relatively unspecialized cell acquires specialized features of an amacrine cell, an interneuron generated in the inner nuclear layer (INL) of the vertebrate retina. Amacrine cells integrate, modulate, and interpose a temporal domain in the visual message presented to the retinal ganglion cells, with which they synapse in the inner plexiform layer. Amacrine cells lack large …	RAR-related orphan receptor B
ENST00000309739	RND1	2.69385e-06	6.72733e-05	3.87446	0.825604	4.4872	7.77414	0.140568	2.92673	0.0389526	2.92673	ENSG00000172602	RND1	48.1566	GO:0007264	small GTPase mediated signal transduction	Any series of molecular signals in which a small monomeric GTPase relays one or more of the signals. [GOC:mah]	Rho family GTPase 1
ENST00000546208	ACTN2	6.86905e-08	2.52889e-06	3.87354	0.718045	3.05757	7.52409	0.0347176	2.28543	0.189847	2.28543	ENSG00000077522	ACTN2	48.1123	GO:2001137	positive regulation of endocytic recycling	Any process that activates or increases the frequency, rate or extent of endocytic recycling. [GOC:obol]	actinin, alpha 2	Familial isolated dilated cardiomyopathy
ENST00000560573	ISG20	5.64108e-12	4.33492e-10	3.86407	0.560951	1.56375	5.66455	0.658817	0.757178	0.689208	0.757178	ENSG00000172183	ISG20	47.6589	GO:0008859	exoribonuclease II activity	Catalysis of the reaction: RNA + H2O = 5'-phosphomononucleotides. Cleaves RNA in the 3' to 5' direction. [EC:3.1.13.1, ISBN:0198547684]	interferon stimulated exonuclease gene 20kDa	defense response to virus
ENST00000391826	IL4I1	7.91614e-19	1.40327e-16	3.86206	0.43584	2.23075	5.19017	0.196919	0.657884	0.406979	0.657884	ENSG00000104951	IL4I1	47.5632	GO:0001716	L-amino-acid oxidase activity	Catalysis of the reaction: a L-amino acid + H2O + O2 = a 2-oxo acid + NH3 + hydrogen peroxide. [EC:1.4.3.2]	interleukin 4 induced 1
ENST00000359534	KCNK5	3.63511e-25	1.03053e-22	3.85321	0.371807	1.97392	4.3448	0.119221	0.326709	0.502861	0.502861	ENSG00000164626	KCNK5	47.1444	GO:0007588	excretion	The elimination by an organism of the waste products that arise as a result of metabolic activity. These products include water, carbon dioxide (CO2), and nitrogenous compounds. [ISBN:0192801023]	potassium channel, two pore domain subfamily K, member 5
ENST00000379977	IL15RA	2.22862e-10	1.32932e-08	3.84813	0.606511	2.4863	5.38056	0.788758	0.86659	0.326212	0.86659	ENSG00000134470	IL15RA	46.9051	GO:0016021	integral component of membrane	The component of a membrane consisting of the gene products and protein complexes having at least some part of their peptide sequence embedded in the hydrophobic region of the membrane. [GOC:dos, GOC:go_curators]	interleukin 15 receptor subunit alpha
ENST00000589979	DHX58	4.42665e-15	5.26007e-13	3.84324	0.490071	3.03283	4.88096	0.354858	0.725907	0.194782	0.725907	ENSG00000108771	DHX58	46.6767				DEXH (Asp-Glu-X-His) box polypeptide 58	negative regulation of MDA-5 signaling pathway
ENST00000373921	THEMIS2	2.89508e-13	2.6434e-11	3.83987	0.526068	3.75844	6.31446	0.430099	0.815263	0.0831274	0.815263	ENSG00000130775	THEMIS2	46.5192	GO:0005515	protein binding	Interacting selectively and non-covalently with any protein or protein complex (a complex of two or more proteins that may include other nonprotein molecules). [GOC:go_curators]	thymocyte selection associated family member 2
ENST00000426954	ZNF419	1.17854e-06	3.21237e-05	3.83541	0.789307	2.2239	6.40615	2.26234	0.541182	0.409328	0.541182	ENSG00000105136	ZNF419	46.3123	GO:0000977	RNA polymerase II regulatory region sequence-specific DNA binding	Interacting selectively and non-covalently with a specific sequence of DNA that is part of a regulatory region that controls the transcription of a gene or cistron by RNA polymerase II. [GOC:txnOH]	zinc finger protein 419
ENST00000264346	HERC6	9.26494e-214	3.50646e-209	3.83361	0.122855	6.66125	4.12285	0.0114366	0.0564831	0.0146249	0.0564831	ENSG00000138642	HERC6	46.2293	GO:0042787	protein ubiquitination involved in ubiquitin-dependent protein catabolic process	The process in which a ubiquitin group, or multiple groups, are covalently attached to the target protein, thereby initiating the degradation of that protein. [GOC:go_curators]	HECT and RLD domain containing E3 ubiquitin protein ligase family member 6
ENST00000397278	APOL1	5.29575e-10	2.95178e-08	3.82718	0.616285	4.11451	7.08974	0.806541	0.902593	0.0567497	0.902593	ENSG00000100342	APOL1	45.9329	GO:0034361	very-low-density lipoprotein particle	A triglyceride-rich lipoprotein particle that is typically composed of APOB100, APOE and APOCs and has a density of about 1.006 g/ml and a diameter of between 20-80 nm. It is found in blood and transports endogenous products (newly synthesized cholesterol and triglycerides) from the liver. [GOC:BHF, GOC:expert_pt, GOC:mah, GOC:rl]	apolipoprotein L1	Sporadic idiopathic steroid-resistant nephrotic syndrome with focal segmental hyalinosis
ENST00000583093	SECTM1	4.12847e-13	3.72463e-11	3.82396	0.527349	2.78212	5.06808	0.340298	0.911138	0.248261	0.911138	ENSG00000141574	SECTM1	45.7849	GO:0007498	mesoderm development	The process whose specific outcome is the progression of the mesoderm over time, from its formation to the mature structure. The mesoderm is the middle germ layer that develops into muscle, bone, cartilage, blood and connective tissue. [GOC:dph, GOC:tb]	secreted and transmembrane 1	positive regulation of I-kappaB kinase/NF-kappaB signaling
ENST00000422556	SPATA2	3.84028e-06	9.17557e-05	3.81033	0.824775	3.272	6.72031	0.808994	2.25215	0.149032	2.25215	ENSG00000158480	SPATA2	45.1655	GO:0003674	molecular_function	Elemental activities, such as catalysis or binding, describing the actions of a gene product at the molecular level. A given gene product may exhibit one or more molecular functions. [GOC:go_curators]	spermatogenesis associated 2
ENST00000400558	C21orf91	5.31932e-11	3.53189e-09	3.78878	0.577407	2.55236	5.25041	1.19295	0.129727	0.307345	0.307345	ENSG00000154642	C21orf91	44.2023				chromosome 21 open reading frame 91
ENST00000371826	IFIT2	1.67921e-68	3.25908e-65	3.77312	0.215719	7.25619	4.40157	0.0321323	0.177273	0.0130721	0.177273	ENSG00000119922	IFIT2	43.5158	GO:0008637	apoptotic mitochondrial changes	The morphological and physiological alterations undergone by mitochondria during apoptosis. [GOC:mah, GOC:mtg_apoptosis]	interferon induced protein with tetratricopeptide repeats 2	cellular response to virus
ENST00000621600	CCL4	4.09542e-18	6.73901e-16	3.77021	0.434551	1.55387	4.66865	0.0966048	0.753151	0.694207	0.753151	ENSG00000277943	CCL4	43.3893	GO:2000503	positive regulation of natural killer cell chemotaxis	Any process that activates or increases the frequency, rate or extent of natural killer cell chemotaxis. [GOC:BHF]	chemokine (C-C motif) ligand 4	positive regulation of calcium-mediated signaling
ENST00000586522	DHX58	1.64668e-20	3.37784e-18	3.76021	0.405062	3.74064	4.32224	0.653572	-0.169455	0.0847645	0.0847645	ENSG00000108771	DHX58	42.9576				DEXH (Asp-Glu-X-His) box polypeptide 58	negative regulation of MDA-5 signaling pathway
ENST00000393717	ICAM4	1.33931e-16	1.87734e-14	3.75867	0.454493	1.81628	4.572	0.216345	0.713194	0.569689	0.713194	ENSG00000105371	ICAM4	42.8914	GO:0005178	integrin binding	Interacting selectively and non-covalently with an integrin. [GOC:ceb]	intercellular adhesion molecule 4 (Landsteiner-Wiener blood group)	BLOOD GROUP SYSTEM LANDSTEINER-WIENER
ENST00000471953	MTF2	9.43356e-11	6.01849e-09	3.74789	0.578756	1.99215	5.04843	0.853604	0.65371	0.495521	0.65371	ENSG00000143033	MTF2	42.4313	GO:0019827	stem cell population maintenance	The process by which an organism or tissue maintains a population of stem cells of a single type. This can be achieved by a number of mechanisms: stem cell asymmetric division maintains stem cell numbers; stem cell symmetric division increases them; maintenance of a stem cell niche maintains the conditions for commitment to the stem cell fate for some types of stem cell; stem cells may arise de n…	metal response element binding transcription factor 2
ENST00000506842	HERC6	4.99515e-21	1.08338e-18	3.74086	0.397571	1.75725	4.13423	0.115036	0.20614	0.596247	0.596247	ENSG00000138642	HERC6	42.1343	GO:0042787	protein ubiquitination involved in ubiquitin-dependent protein catabolic process	The process in which a ubiquitin group, or multiple groups, are covalently attached to the target protein, thereby initiating the degradation of that protein. [GOC:go_curators]	HECT and RLD domain containing E3 ubiquitin protein ligase family member 6
ENST00000605080	HEATR9	3.40883e-18	5.64606e-16	3.73739	0.429736	1.5305	3.89954	0.124891	0.079978	0.706136	0.706136	ENSG00000270379	HEATR9	41.9884	GO:0005488	binding	The selective, non-covalent, often stoichiometric, interaction of a molecule with one or more specific sites on another molecule. [GOC:ceb, GOC:mah, ISBN:0198506732]	HEAT repeat containing 9
ENST00000510223	HERC5	1.57148e-16	2.1719e-14	3.7333	0.452469	2.14421	4.56086	0.448724	0.472553	0.437485	0.472553	ENSG00000138646	HERC5	41.8168	GO:0042296	ISG15 transferase activity	Catalysis of the transfer of ISG15 from one protein to another via the reaction X-ISG15 + Y --> Y-ISG15 + X, where both X-ISG15 and Y-ISG15 are covalent linkages. [GOC:mah, PMID:12826404]	HECT and RLD domain containing E3 ubiquitin protein ligase 5
ENST00000409385	SPATS2L	0.000507254	0.00615906	3.72457	1.07123	3.69536	9.67361	2.32346	2.84048	0.0891931	2.84048	ENSG00000196141	SPATS2L	41.4534	GO:0043234	protein complex	A stable macromolecular complex composed (only) of two or more polypeptide subunits along with any covalently attached molecules (such as lipid anchors or oligosaccharide) or non-protein prosthetic groups (such as nucleotides or metal ions). Prosthetic group in this context refers to a tightly bound cofactor. The component polypeptide subunits may be identical. [GOC:go_curators, http://www.ebi.ac…	spermatogenesis associated, serine rich 2 like
ENST00000393618	NAMPT	3.89441e-14	4.03256e-12	3.72373	0.492265	1.78133	4.53685	0.50515	-0.0768739	0.585313	0.585313	ENSG00000105835	NAMPT	41.4185	GO:0047280	nicotinamide phosphoribosyltransferase activity	Catalysis of the reaction: diphosphate + nicotinamide mononucleotide = 5-phospho-alpha-D-ribose 1-diphosphate + H(+) + nicotinamide. [EC:2.4.2.12, RHEA:16152]	nicotinamide phosphoribosyltransferase
ENST00000432979	SP100	2.77781e-12	2.25119e-10	3.72258	0.532671	1.8735	4.92567	0.732084	0.426965	0.544737	0.544737	ENSG00000067066	SP100	41.3712	GO:1902044	regulation of Fas signaling pathway	Any process that modulates the frequency, rate or extent of Fas signaling pathway. [GOC:TermGenie, PMID:17245429]	SP100 nuclear antigen	negative regulation of cellular component movement
ENST00000398762	EPSTI1	6.73021e-31	2.62593e-28	3.72086	0.321931	4.49428	4.1374	0.273151	0.193227	0.0386949	0.193227	ENSG00000133106	EPSTI1	41.2999				epithelial stromal interaction 1 (breast)
ENST00000273960	HERC6	6.16523e-10	3.4088e-08	3.71902	0.601185	1.16636	3.78865	0.715078	-0.598064	0.91133	0.91133	ENSG00000138642	HERC6	41.2241	GO:0042787	protein ubiquitination involved in ubiquitin-dependent protein catabolic process	The process in which a ubiquitin group, or multiple groups, are covalently attached to the target protein, thereby initiating the degradation of that protein. [GOC:go_curators]	HECT and RLD domain containing E3 ubiquitin protein ligase family member 6
ENST00000580779	LGALS9	3.12192e-15	3.76286e-13	3.70878	0.470304	2.42469	5.21986	0.650776	0.287733	0.344559	0.344559	ENSG00000168961	LGALS9	40.8042	GO:2001269	positive regulation of cysteine-type endopeptidase activity involved in apoptotic signaling pathway	Any process that activates or increases the frequency, rate or extent of cysteine-type endopeptidase activity involved in apoptotic signaling pathway. [GOC:mtg_apoptosis]	lectin, galactoside-binding, soluble, 9	cellular response to virus
ENST00000374859	PSMB9	6.34417e-18	1.00884e-15	3.69993	0.428919	3.24768	6.06116	0.124801	0.703071	0.1534	0.703071	ENSG00000240065	PSMB9	40.4444	GO:0004175	endopeptidase activity	Catalysis of the hydrolysis of internal, alpha-peptide bonds in a polypeptide chain. [http://merops.sanger.ac.uk/about/glossary.htm#ENDOPEPTIDASE]	proteasome subunit beta 9
ENST00000383114	PSMB9	6.34417e-18	1.00884e-15	3.69993	0.428919	3.24768	6.06116	0.124801	0.703071	0.1534	0.703071	ENSG00000240118	PSMB9	40.4444	GO:1990111	spermatoproteasome complex	A proteasome specifically found in mammalian testis. Contains the proteasome activator PA200 in the regulatory particle, and beta1i, beta2i, beta5i and/or alpha4s in the core (20S) subunit. Beta1i, beta2i and beta5i are inducible catalytic subunits, closely related to beta1, beta2 and beta5. Alpha4s is a sperm-specific 20S subunit, but unlike other alternative 20S subunits alpha4s lies in the out…	proteasome subunit beta 9
ENST00000383234	PSMB9	6.34417e-18	1.00884e-15	3.69993	0.428919	3.24768	6.06116	0.124801	0.703071	0.1534	0.703071	ENSG00000243594	PSMB9	40.4444	GO:0004175	endopeptidase activity	Catalysis of the hydrolysis of internal, alpha-peptide bonds in a polypeptide chain. [http://merops.sanger.ac.uk/about/glossary.htm#ENDOPEPTIDASE]	proteasome subunit beta 9
ENST00000422729	PSMB9	6.34417e-18	1.00884e-15	3.69993	0.428919	3.24768	6.06116	0.124801	0.703071	0.1534	0.703071	ENSG00000243067	PSMB9	40.4444	GO:0004175	endopeptidase activity	Catalysis of the hydrolysis of internal, alpha-peptide bonds in a polypeptide chain. [http://merops.sanger.ac.uk/about/glossary.htm#ENDOPEPTIDASE]	proteasome subunit beta 9
ENST00000444284	PSMB9	6.34417e-18	1.00884e-15	3.69993	0.428919	3.24768	6.06116	0.124801	0.703071	0.1534	0.703071	ENSG00000239836	PSMB9	40.4444	GO:0004175	endopeptidase activity	Catalysis of the hydrolysis of internal, alpha-peptide bonds in a polypeptide chain. [http://merops.sanger.ac.uk/about/glossary.htm#ENDOPEPTIDASE]	proteasome subunit beta 9
ENST00000567487	CPNE2	2.21815e-21	5.0119e-19	3.69741	0.389437	1.93324	4.051	0.162946	0.195972	0.519528	0.519528	ENSG00000140848	CPNE2	40.3425	GO:0070062	extracellular exosome	A membrane-bounded vesicle that is released into the extracellular region by fusion of the limiting endosomal membrane of a multivesicular body with the plasma membrane. Extracellular exosomes, also simply called exosomes, have a diameter of about 40-100 nm. [GOC:BHF, GOC:mah, PMID:15908444, PMID:17641064, PMID:19442504, PMID:19498381, PMID:22418571, PMID:24009894]	copine II
ENST00000505236	RELB	7.23605e-05	0.00118043	3.68884	0.929555	2.15605	7.03797	2.48552	1.40281	0.433203	1.40281	ENSG00000104856	RELB	39.9983	GO:0033256	I-kappaB/NF-kappaB complex	A protein complex containing an inhibitory-kappaB (I-kappaB/IKB) protein and one or more copies of an NF-kappaB protein. In the resting state, NF-kappaB dimers are bound to I-kappaB proteins, sequestering NF-kappaB in the cytoplasm. [GOC:bf, GOC:mah, PMID:9407099]	v-rel avian reticuloendotheliosis viral oncogene homolog B	negative regulation of interferon-beta production
ENST00000404909	RTN4	2.99353e-06	7.38556e-05	3.68252	0.788335	2.18242	5.76805	2.37283	0.0362494	0.423793	0.423793	ENSG00000115310	RTN4	39.7465	GO:0021801	cerebral cortex radial glia guided migration	The radial migration of neuronal or glial precursor cells along radial glial cells during the development of the cerebral cortex. [GO_REF:0000021, GOC:cls, GOC:dgh, GOC:dph, GOC:jid, GOC:mtg_15jun06, PMID:12626695]	reticulon 4	endoplasmic reticulum tubular network organization
ENST00000522495	IDO1	2.60919e-32	1.12214e-29	3.6744	0.310499	2.6035	5.73292	0.140528	0.175914	0.293316	0.293316	ENSG00000131203	IDO1	39.425	GO:0020037	heme binding	Interacting selectively and non-covalently with heme, any compound of iron complexed in a porphyrin (tetrapyrrole) ring. [CHEBI:30413, GOC:ai]	indoleamine 2,3-dioxygenase 1	indoleamine 23-dioxygenase activity
ENST00000576459	XAF1	3.8114e-14	3.95314e-12	3.65932	0.483571	1.51436	4.28013	0.337831	0.40851	0.714453	0.714453	ENSG00000132530	XAF1	38.8347	GO:0005515	protein binding	Interacting selectively and non-covalently with any protein or protein complex (a complex of two or more proteins that may include other nonprotein molecules). [GOC:go_curators]	XIAP associated factor 1
ENST00000313624	EPSTI1	2.48488e-25	7.07099e-23	3.65337	0.351293	5.7552	4.06242	0.0726028	0.482728	0.019523	0.482728	ENSG00000133106	EPSTI1	38.6047				epithelial stromal interaction 1 (breast)
ENST00000400234	RFPL3S	1.1505e-13	1.11934e-11	3.6451	0.491097	1.44564	4.04803	0.334639	0.243401	0.750654	0.750654	ENSG00000205853	RFPL3S	38.2866
ENST00000539144	NLRC5	2.81915e-05	0.000521735	3.64013	0.869262	4.06435	6.59707	1.76336	1.63692	0.0598558	1.63692	ENSG00000140853	NLRC5	38.0966	GO:0043549	regulation of kinase activity	Any process that modulates the frequency, rate or extent of kinase activity, the catalysis of the transfer of a phosphate group, usually from ATP, to a substrate molecule. [GOC:bf]	NLR family, CARD domain containing 5	negative regulation of innate immune response
ENST00000425368	CFB	2.388e-10	1.41657e-08	3.6373	0.574246	2.56704	6.1043	0.811855	0.672057	0.303267	0.672057	ENSG00000243649	CFB	37.9893				complement factor B	Atypical hemolytic uremic syndrome with B factor anomaly
ENST00000557824	ISG20	2.29459e-21	5.15385e-19	3.6259	0.382047	3.63066	4.05983	0.207696	0.449124	0.0961873	0.449124	ENSG00000172183	ISG20	37.5585	GO:0008859	exoribonuclease II activity	Catalysis of the reaction: RNA + H2O = 5'-phosphomononucleotides. Cleaves RNA in the 3' to 5' direction. [EC:3.1.13.1, ISBN:0198547684]	interferon stimulated exonuclease gene 20kDa	defense response to virus
ENST00000462100	HLA-B	6.5226e-06	0.000146808	3.62568	0.804151	3.73974	7.707	1.28795	1.62202	0.084849	1.62202	ENSG00000232126	HLA-B	37.5501	GO:0019882	antigen processing and presentation	The process in which an antigen-presenting cell expresses antigen (peptide or lipid) on its cell surface in association with an MHC protein complex. [GO_REF:0000022, GOC:add, GOC:mtg_15nov05, ISBN:0781735149, PMID:15771591, PMID:15928678]	major histocompatibility complex, class I, B	SEVERE CUTANEOUS ADVERSE REACTION SUSCEPTIBILITY TO TOXIC EPIDERMAL NECROLYSIS SUSCEPTIBILITY TO INCLUDED
ENST00000379389	ISG15	5.1804e-68	9.56391e-65	3.61458	0.207417	7.72084	3.85027	0.0014926	0.192106	0.0123685	0.192106	ENSG00000187608	ISG15	37.1358	GO:0005515	protein binding	Interacting selectively and non-covalently with any protein or protein complex (a complex of two or more proteins that may include other nonprotein molecules). [GOC:go_curators]	ISG15 ubiquitin-like modifier	Mendelian susceptibility to mycobacterial diseases due to complete ISG15 deficiency
ENST00000467510	MX1	1.49934e-15	1.86048e-13	3.60957	0.452498	1.25886	3.60472	0.0657821	0.103759	0.855612	0.855612	ENSG00000157601	MX1	36.9503	GO:0034340	response to type I interferon	Any process that results in a change in state or activity of a cell or an organism (in terms of movement, secretion, enzyme production, gene expression, etc.) as a result of a type I interferon stimulus. Type I interferons include the interferon-alpha, beta, delta, episilon, zeta, kappa, tau, and omega gene families. [GOC:add, ISBN:0126896631, PMID:15546383, PMID:16681834]	MX dynamin-like GTPase 1	cellular response to virus
ENST00000524918	PARP10	3.32196e-08	1.3158e-06	3.60805	0.65321	2.70046	5.14059	1.18322	0.736857	0.268101	0.736857	ENSG00000178685	PARP10	36.8939	GO:0005794	Golgi apparatus	A compound membranous cytoplasmic organelle of eukaryotic cells, consisting of flattened, ribosome-free vesicles arranged in a more or less regular stack. The Golgi apparatus differs from the endoplasmic reticulum in often having slightly thicker membranes, appearing in sections as a characteristic shallow semicircle so that the convex side (cis or entry face) abuts the endoplasmic reticulum, sec…	poly(ADP-ribose) polymerase family member 10	K63-linked polyubiquitin binding
ENST00000367084	YOD1	0.000129968	0.00194497	3.60568	0.942288	3.93879	7.03416	2.5477	1.44789	0.0684743	1.44789	ENSG00000180667	YOD1	36.8069	GO:1990168	protein K33-linked deubiquitination	A protein deubiquitination process in which a K33-linked ubiquitin chain, i.e. a polymer of ubiquitin formed by linkages between lysine residues at position 33 of the ubiquitin monomers, is removed from a protein. [PMID:23827681]	YOD1 deubiquitinase	ER-associated ubiquitin-dependent protein catabolic process
ENST00000395761	CXCL1	2.46045e-77	7.44955e-74	3.60304	0.193563	4.24558	3.59314	0.10628	0.0623192	0.0494786	0.0623192	ENSG00000163739	CXCL1	36.7095	GO:0045236	CXCR chemokine receptor binding	Interacting selectively and non-covalently with a chemokine receptor in the CXCR family. [GOC:ceb, PMID:11910892]	chemokine (C-X-C motif) ligand 1 (melanoma growth stimulating activity, alpha)
ENST00000589827	SEC14L1	9.15716e-09	4.13071e-07	3.60073	0.626688	1.5162	5.37188	0.896286	0.871037	0.713502	0.871037	ENSG00000129657	SEC14L1	36.6249				SEC14-like lipid binding 1
ENST00000339430	LITAF	0.00278154	0.0247261	3.58804	1.19965	3.67997	9.12523	2.12753	4.3487	0.0907857	4.3487	ENSG00000189067	LITAF	36.1631	GO:0050699	WW domain binding	Interacting selectively and non-covalently with a WW domain of a protein, a small module composed of 40 amino acids and plays a role in mediating protein-protein interactions via proline-rich regions. [PMID:14531730]	lipopolysaccharide-induced TNF factor	CHARCOT-MARIE-TOOTH DISEASE TYPE 1C
ENST00000497048	KLF4	1.88211e-12	1.56038e-10	3.5867	0.50926	4.33992	4.45979	1.12211	0.0244038	0.044951	0.044951	ENSG00000136826	KLF4	36.1145	GO:2000342	negative regulation of chemokine (C-X-C motif) ligand 2 production	Any process that stops, prevents or reduces the frequency, rate or extent of chemokine (C-X-C motif) ligand 2 production. [GOC:BHF, GOC:mah]	Kruppel-like factor 4 (gut)	cellular response to laminar fluid shear stress
ENST00000536491	SLC15A3	9.72461e-20	1.84483e-17	3.58564	0.394374	3.94499	4.50439	0.180304	0.519584	0.0680193	0.519584	ENSG00000110446	SLC15A3	36.0765	GO:0006810	transport	The directed movement of substances (such as macromolecules, small molecules, ions) into, out of or within a cell, or between cells, or within a multicellular organism by means of some agent such as a transporter or pore. [GOC:dph, GOC:jl, GOC:mah]	solute carrier family 15 (oligopeptide transporter), member 3
ENST00000261937	FLT4	4.13524e-20	8.16234e-18	3.57811	0.389582	1.97844	3.87155	0.181949	0.257063	0.501034	0.501034	ENSG00000037280	FLT4	35.8056	GO:0001946	lymphangiogenesis	Lymph vessel formation when new vessels emerge from the proliferation of pre-existing vessels. [GOC:dph, PMID:11596157]	fms-related tyrosine kinase 4	Milroy Disease
ENST00000537307	SLC15A3	9.58626e-19	1.68747e-16	3.56519	0.40331	4.03911	4.58117	0.188504	0.54346	0.0614898	0.54346	ENSG00000110446	SLC15A3	35.3461	GO:0006810	transport	The directed movement of substances (such as macromolecules, small molecules, ions) into, out of or within a cell, or between cells, or within a multicellular organism by means of some agent such as a transporter or pore. [GOC:dph, GOC:jl, GOC:mah]	solute carrier family 15 (oligopeptide transporter), member 3
ENST00000543677	OASL	5.39393e-15	6.32997e-13	3.56471	0.455999	1.32423	3.80848	0.117952	0.316375	0.817757	0.817757	ENSG00000135114	OASL	35.3293	GO:0046966	thyroid hormone receptor binding	Interacting selectively and non-covalently with a thyroid hormone receptor. [GOC:ai]	2'-5'-oligoadenylate synthetase-like
ENST00000484102	CFB	4.06822e-15	4.84938e-13	3.55791	0.453075	1.49647	3.71684	0.199986	0.211864	0.723759	0.723759	ENSG00000243570	CFB	35.0898	GO:0030449	regulation of complement activation	Any process that modulates the frequency, rate or extent of complement activation. [GOC:go_curators]	complement factor B	COMPLEMENT FACTOR B DEFICIENCY
ENST00000498766	CFB	4.06822e-15	4.84938e-13	3.55791	0.453075	1.49647	3.71684	0.199986	0.211864	0.723759	0.723759	ENSG00000242335	CFB	35.0898	GO:0030449	regulation of complement activation	Any process that modulates the frequency, rate or extent of complement activation. [GOC:go_curators]	complement factor B	COMPLEMENT FACTOR B DEFICIENCY
ENST00000568027	ATF7IP2	1.35878e-06	3.64588e-05	3.55066	0.734981	2.10596	5.48221	1.53273	0.898159	0.45155	0.898159	ENSG00000166669	ATF7IP2	34.8364				activating transcription factor 7 interacting protein 2
ENST00000395681	TYMP	1.13659e-06	3.11823e-05	3.5468	0.728837	2.44915	6.62106	0.612514	1.7779	0.337189	1.7779	ENSG00000025708	TYMP	34.7022	GO:0016154	pyrimidine-nucleoside phosphorylase activity	Catalysis of the reaction: pyrimidine nucleoside + phosphate = pyrimidine + alpha-D-ribose 1-phosphate. [EC:2.4.2.2]	thymidine phosphorylase	Mitochondrial neurogastrointestinal encephalomyopathy
ENST00000622145	HLA-F	6.49127e-18	1.03007e-15	3.54549	0.411141	2.71592	7.38618	0.49642	-0.105422	0.264246	0.264246	ENSG00000234487	HLA-F	34.6568	GO:0005515	protein binding	Interacting selectively and non-covalently with any protein or protein complex (a complex of two or more proteins that may include other nonprotein molecules). [GOC:go_curators]	major histocompatibility complex, class I, F
ENST00000462041	IFI44L	3.1699e-17	4.73253e-15	3.54403	0.419902	1.54115	3.72879	0.092746	0.201858	0.700684	0.700684	ENSG00000137959	IFI44L	34.606	GO:0005654	nucleoplasm	That part of the nuclear content other than the chromosomes or the nucleolus. [GOC:ma, ISBN:0124325653]	interferon induced protein 44 like
ENST00000370747	IFI44	5.46234e-111	4.59401e-107	3.54173	0.158216	6.52455	3.51158	0.0143329	0.0983129	0.0150647	0.0983129	ENSG00000137965	IFI44	34.5268	GO:0009615	response to virus	Any process that results in a change in state or activity of a cell or an organism (in terms of movement, secretion, enzyme production, gene expression, etc.) as a result of a stimulus from a virus. [GOC:hb]	interferon induced protein 44
ENST00000379153	CD83	1.33359e-07	4.5988e-06	3.53547	0.670338	3.69543	6.72357	0.52504	1.49705	0.0891855	1.49705	ENSG00000112149	CD83	34.3113	GO:0001817	regulation of cytokine production	Any process that modulates the frequency, rate, or extent of production of a cytokine. [GOC:add, ISBN:0781735149]	CD83 molecule
ENST00000473240	GCA	1.14271e-21	2.65322e-19	3.53022	0.36915	2.44838	3.87314	0.275802	0.124509	0.33742	0.33742	ENSG00000115271	GCA	34.1315	GO:0005886	plasma membrane	The membrane surrounding a cell that separates the cell from its external environment. It consists of a phospholipid bilayer and associated proteins. [ISBN:0716731363]	grancalcin
ENST00000410093	LIMS1	0.000277698	0.00369611	3.52396	0.969383	3.19961	7.14015	2.12282	2.10584	0.162267	2.10584	ENSG00000169756	LIMS1	33.9185	GO:0051894	positive regulation of focal adhesion assembly	Any process that activates or increases the frequency, rate or extent of focal adhesion assembly, the establishment and maturation of focal adhesions. [GOC:ai]	LIM and senescent cell antigen-like domains 1	cell-cell junction
ENST00000617074	HSPA4	4.49528e-05	0.00078185	3.51809	0.862186	4.84504	6.22879	1.28731	2.05783	0.0290395	2.05783	ENSG00000170606	HSPA4	33.7198	GO:0045040	protein import into mitochondrial outer membrane	The process comprising the insertion of proteins from outside the organelle into the mitochondrial outer membrane, mediated by large outer membrane translocase complexes. [GOC:mcc, GOC:vw, PMID:18672008]	heat shock protein family A (Hsp70) member 4
ENST00000486536	USP41	6.32096e-16	8.23498e-14	3.51345	0.434674	1.49655	3.65117	0.126522	0.304486	0.723714	0.723714	ENSG00000161133	USP41	33.564	GO:0036459	ubiquitinyl hydrolase activity	Catalysis of the thiol-dependent hydrolysis of an ester, thioester, amide, peptide or isopeptide bond formed by the C-terminal glycine of ubiquitin. [EC:3.4.19.12, GOC:bf, GOC:ka]
ENST00000263934	KIF1B	0.000196964	0.00277321	3.50172	0.940594	3.2843	6.75921	1.87831	2.10292	0.146854	2.10292	ENSG00000054523	KIF1B	33.1724	GO:0007274	neuromuscular synaptic transmission	The process of communication from a neuron to a muscle, across a synapse. [GOC:jl, MeSH:D009435]	kinesin family member 1B	Autosomal dominant Charcot-Marie-Tooth disease type 2A1
ENST00000435611	MX2	8.92524e-14	8.84265e-12	3.49972	0.469389	1.50732	3.73746	0.273364	0.28526	0.718104	0.718104	ENSG00000183486	MX2	33.1062	GO:0046822	regulation of nucleocytoplasmic transport	Any process that modulates the frequency, rate or extent of the directed movement of substances between the nucleus and the cytoplasm. [GOC:bf]	MX dynamin-like GTPase 2	GTP binding
ENST00000245907	C3	2.29285e-43	1.71835e-40	3.48773	0.252595	4.64268	3.47464	0.0670063	0.220112	0.0338852	0.220112	ENSG00000125730	C3	32.7116	GO:2000427	positive regulation of apoptotic cell clearance	Any process that activates or increases the frequency, rate or extent of apoptotic cell clearance. [GOC:obol]	complement component 3	Atypical hemolytic uremic syndrome with C3 anomaly
ENST00000463600	HLA-B	1.42199e-16	1.98588e-14	3.4843	0.421681	2.23356	4.52646	0.394149	0.143633	0.406018	0.406018	ENSG00000228964	HLA-B	32.5996	GO:0019882	antigen processing and presentation	The process in which an antigen-presenting cell expresses antigen (peptide or lipid) on its cell surface in association with an MHC protein complex. [GO_REF:0000022, GOC:add, GOC:mtg_15nov05, ISBN:0781735149, PMID:15771591, PMID:15928678]	major histocompatibility complex, class I, B	SEVERE CUTANEOUS ADVERSE REACTION SUSCEPTIBILITY TO TOXIC EPIDERMAL NECROLYSIS SUSCEPTIBILITY TO INCLUDED
ENST00000488367	HLA-B	1.42199e-16	1.98588e-14	3.4843	0.421681	2.23356	4.52646	0.394149	0.143633	0.406018	0.406018	ENSG00000224608	HLA-B	32.5996	GO:0019882	antigen processing and presentation	The process in which an antigen-presenting cell expresses antigen (peptide or lipid) on its cell surface in association with an MHC protein complex. [GO_REF:0000022, GOC:add, GOC:mtg_15nov05, ISBN:0781735149, PMID:15771591, PMID:15928678]	major histocompatibility complex, class I, B	detection of bacterium
ENST00000375887	TNFSF13B	2.68485e-08	1.08909e-06	3.48043	0.625882	3.59589	4.77466	0.844153	0.918624	0.100274	0.918624	ENSG00000102524	TNFSF13B	32.4736	GO:0033209	tumor necrosis factor-mediated signaling pathway	A series of molecular signals initiated by the binding of a tumor necrosis factor to a receptor on the surface of a cell, and ending with regulation of a downstream cellular process, e.g. transcription. [GOC:mah, GOC:signaling]	tumor necrosis factor superfamily member 13b
ENST00000620985	SAMD9	1.13735e-06	3.11918e-05	3.47206	0.713499	4.87858	5.75578	2.22466	0.0662053	0.0284129	0.0662053	ENSG00000205413	SAMD9	32.2032	GO:0005515	protein binding	Interacting selectively and non-covalently with any protein or protein complex (a complex of two or more proteins that may include other nonprotein molecules). [GOC:go_curators]	sterile alpha motif domain containing 9	Normocalcemic tumoral calcinosis
ENST00000353609	FOSB	6.70966e-05	0.00110796	3.47089	0.870692	3.24534	6.51242	1.03857	2.3729	0.153826	2.3729	ENSG00000125740	FOSB	32.1652	GO:0000982	transcription factor activity, RNA polymerase II core promoter proximal region sequence-specific binding	Interacting selectively and non-covalently with a sequence of DNA that is in cis with and relatively close to a core promoter for RNA polymerase II (RNAP II) in order to modulate transcription by RNAP II. [GOC:txnOH]	FBJ murine osteosarcoma viral oncogene homolog B
ENST00000610710	CFAP57	5.51752e-12	4.25293e-10	3.4563	0.501525	3.4204	4.52809	0.519947	0.611926	0.124376	0.611926	ENSG00000243710	CFAP57	31.6995	GO:0005515	protein binding	Interacting selectively and non-covalently with any protein or protein complex (a complex of two or more proteins that may include other nonprotein molecules). [GOC:go_curators]	cilia and flagella associated protein 57
ENST00000310865	NEURL3	4.91173e-20	9.6317e-18	3.45363	0.37679	2.09273	4.035	0.182369	0.393837	0.456498	0.456498	ENSG00000163121	NEURL3	31.615	GO:0005515	protein binding	Interacting selectively and non-covalently with any protein or protein complex (a complex of two or more proteins that may include other nonprotein molecules). [GOC:go_curators]	neuralized E3 ubiquitin protein ligase 3
ENST00000397289	APOL3	2.69311e-08	1.09127e-06	3.45296	0.621002	3.41452	4.94731	0.393853	1.34154	0.125283	1.34154	ENSG00000128284	APOL3	31.5937	GO:0042157	lipoprotein metabolic process	The chemical reactions and pathways involving any conjugated, water-soluble protein in which the nonprotein group consists of a lipid or lipids. [ISBN:0198506732]	apolipoprotein L, 3	positive regulation of I-kappaB kinase/NF-kappaB signaling
ENST00000397293	APOL3	2.69311e-08	1.09127e-06	3.45296	0.621002	3.41452	4.94731	0.393853	1.34154	0.125283	1.34154	ENSG00000128284	APOL3	31.5937	GO:0042157	lipoprotein metabolic process	The chemical reactions and pathways involving any conjugated, water-soluble protein in which the nonprotein group consists of a lipid or lipids. [ISBN:0198506732]	apolipoprotein L, 3	positive regulation of I-kappaB kinase/NF-kappaB signaling
ENST00000307407	CXCL8	1.82594e-132	2.76422e-128	3.4444	0.140637	4.86342	3.4089	0.0368033	0.0522014	0.0286909	0.0522014	ENSG00000169429	CXCL8	31.3243	GO:0045091	regulation of single stranded viral RNA replication via double stranded DNA intermediate	Any process that modulates the frequency, rate or extent of single stranded viral RNA replication via double stranded DNA intermediate. [GOC:go_curators]	chemokine (C-X-C motif) ligand 8
ENST00000552756	OAS2	1.82419e-08	7.63287e-07	3.43815	0.610912	1.02593	3.26183	0.678489	-0.555299	1.00097	1.00097	ENSG00000111335	OAS2	31.1293	GO:0018377	protein myristoylation	The covalent attachment of a myristoyl group to a protein. [GOC:ai]	2'-5'-oligoadenylate synthetase 2	2'-5'-oligoadenylate synthetase activity
ENST00000498311	WRAP53	1.58995e-06	4.20505e-05	3.43416	0.715513	2.04881	5.20112	0.963476	1.34034	0.473233	1.34034	ENSG00000141499	WRAP53	31.0055	GO:0032203	telomere formation via telomerase	A cellular process that results in the formation of a telomere at a non-telomeric double-stranded DNA end that involves the activity of a telomerase enzyme. [GOC:cjm, GOC:ns, PMID:11902675, PMID:8622671]	WD repeat containing, antisense to TP53	Dyskeratosis congenita
ENST00000546638	OAS3	8.51371e-14	8.47932e-12	3.42778	0.459357	1.52676	3.66278	0.241486	0.241311	0.708054	0.708054	ENSG00000111331	OAS3	30.8082	GO:0060700	regulation of ribonuclease activity	Any process that modulates the rate, frequency, or extent of ribonuclease activity, catalysis of the hydrolysis of phosphodiester bonds in chains of RNA. [GOC:dph, GOC:tb]	2'-5'-oligoadenylate synthetase 3
ENST00000531655	OR52K3P	4.43784e-17	6.48481e-15	3.42733	0.40798	1.72814	3.82064	0.13937	0.418071	0.609646	0.609646	ENSG00000225101	OR52K3P	30.7942
ENST00000492367	NUCB1	0.000118932	0.00180262	3.41946	0.888559	1.98859	6.27059	2.46734	1.08558	0.49695	1.08558	ENSG00000104805	NUCB1	30.5528	GO:0005793	endoplasmic reticulum-Golgi intermediate compartment	A complex system of membrane-bounded compartments located between endoplasmic reticulum (ER) and the Golgi complex, with a distinctive membrane protein composition; involved in ER-to-Golgi and Golgi-to-ER transport. [GOC:pr, PMID:16723730]	nucleobindin 1
ENST00000523883	SLC25A37	2.04881e-06	5.25875e-05	3.41856	0.719916	1.48242	5.43364	1.43875	0.893509	0.73112	0.893509	ENSG00000147454	SLC25A37	30.5254	GO:0055072	iron ion homeostasis	Any process involved in the maintenance of an internal steady state of iron ions within an organism or cell. [GOC:ai, GOC:jid, GOC:mah]	solute carrier family 25 (mitochondrial iron transporter), member 37
ENST00000394313	ZNF385A	1.16437e-05	0.000244275	3.41489	0.778915	2.85796	5.6629	1.25247	1.47773	0.230966	1.47773	ENSG00000161642	ZNF385A	30.4135	GO:2000765	regulation of cytoplasmic translation	Any process that modulates the frequency, rate or extent of cytoplasmic translation. [GOC:obol]	zinc finger protein 385A	negative regulation of intrinsic apoptotic signaling pathway in response to DNA damage by p53 class mediator
ENST00000438264	ASB1	9.9537e-08	3.51903e-06	3.40907	0.639892	2.55104	4.70223	1.02438	0.818198	0.307715	0.818198	ENSG00000065802	ASB1	30.2371	GO:0042036	negative regulation of cytokine biosynthetic process	Any process that stops, prevents, or reduces the frequency, rate or extent of the chemical reactions and pathways resulting in the formation of cytokines. [GOC:go_curators]	ankyrin repeat and SOCS box containing 1
ENST00000540470	EPSTI1	1.06462e-09	5.63919e-08	3.40545	0.558324	2.28091	4.32089	0.195101	1.20767	0.390127	1.20767	ENSG00000133106	EPSTI1	30.1278				epithelial stromal interaction 1 (breast)
ENST00000548514	OAS3	3.16853e-39	1.98211e-36	3.4042	0.259805	3.61899	3.3419	0.206211	0.0478475	0.0975336	0.0975336	ENSG00000111331	OAS3	30.0903	GO:0060700	regulation of ribonuclease activity	Any process that modulates the rate, frequency, or extent of ribonuclease activity, catalysis of the hydrolysis of phosphodiester bonds in chains of RNA. [GOC:dph, GOC:tb]	2'-5'-oligoadenylate synthetase 3
ENST00000509205	SLC12A2	5.4693e-05	0.000926355	3.39574	0.841653	2.00879	5.6501	2.69881	0.150745	0.488894	0.488894	ENSG00000064651	SLC12A2	29.8367	GO:0070634	transepithelial ammonium transport	The directed movement of ammonium ions from one side of an epithelium to the other. [GOC:mah, GOC:yaf]	solute carrier family 12 (sodium/potassium/chloride transporter), member 2
ENST00000618554	ZNF385C	4.83339e-09	2.28658e-07	3.39545	0.58014	1.36264	3.43245	0.718447	-0.381296	0.796081	0.796081	ENSG00000187595	ZNF385C	29.828	GO:0046872	metal ion binding	Interacting selectively and non-covalently with any metal ion. [GOC:ai]	zinc finger protein 385C
ENST00000011684	PLEKHG6	1.65552e-10	1.01549e-08	3.39341	0.531025	2.20707	4.1823	0.525292	0.743651	0.415146	0.743651	ENSG00000008323	PLEKHG6	29.7673	GO:0032154	cleavage furrow	In animal cells, the first sign of cleavage, or cytokinesis, is the appearance of a shallow groove in the cell surface near the old metaphase plate. A contractile ring containing actin and myosin is located just inside the plasma membrane at the location of the furrow. Ring contraction is associated with centripetal growth of the membrane that deepens the cleavage furrow and divides the cytoplasm…	pleckstrin homology and RhoGEF domain containing G6
ENST00000449886	ZBTB43	5.13316e-05	0.000878066	3.39023	0.8372	3.89919	6.50613	2.58151	0.572565	0.0714537	0.572565	ENSG00000169155	ZBTB43	29.6727	GO:0005515	protein binding	Interacting selectively and non-covalently with any protein or protein complex (a complex of two or more proteins that may include other nonprotein molecules). [GOC:go_curators]	zinc finger and BTB domain containing 43
ENST00000525340	EEF1G	7.86075e-07	2.23658e-05	3.38786	0.68597	3.06198	5.95928	0.545468	1.57203	0.188968	1.57203	ENSG00000254772	EEF1G	29.6026	GO:0010467	gene expression	The process in which a gene's sequence is converted into a mature gene product or products (proteins or RNA). This includes the production of an RNA transcript as well as any processing to produce a mature RNA product or an mRNA (for protein-coding genes) and the translation of that mRNA into protein. Protein maturation is included when required to form an active form of a product from an inactiv…	eukaryotic translation elongation factor 1 gamma
ENST00000572107	XAF1	1.04512e-14	1.18072e-12	3.38694	0.437949	2.22004	3.80103	0.253507	0.609588	0.410657	0.609588	ENSG00000132530	XAF1	29.5752	GO:0005515	protein binding	Interacting selectively and non-covalently with any protein or protein complex (a complex of two or more proteins that may include other nonprotein molecules). [GOC:go_curators]	XIAP associated factor 1
ENST00000450498	IFI44L	2.22831e-14	2.40267e-12	3.38651	0.443451	1.51146	3.53275	0.168962	0.358961	0.715958	0.715958	ENSG00000137959	IFI44L	29.5627	GO:0005654	nucleoplasm	That part of the nuclear content other than the chromosomes or the nucleolus. [GOC:ma, ISBN:0124325653]	interferon induced protein 44 like
ENST00000515365	HERC6	1.70281e-18	2.91608e-16	3.37936	0.385094	3.43475	3.67095	0.391242	0.276096	0.122192	0.276096	ENSG00000138642	HERC6	29.3519	GO:0042787	protein ubiquitination involved in ubiquitin-dependent protein catabolic process	The process in which a ubiquitin group, or multiple groups, are covalently attached to the target protein, thereby initiating the degradation of that protein. [GOC:go_curators]	HECT and RLD domain containing E3 ubiquitin protein ligase family member 6
ENST00000303334	CES3	2.53163e-09	1.25657e-07	3.37206	0.565838	1.99324	4.97122	0.59634	0.844439	0.495086	0.844439	ENSG00000172828	CES3	29.1385	GO:0005788	endoplasmic reticulum lumen	The volume enclosed by the membranes of the endoplasmic reticulum. [ISBN:0198547684]	carboxylesterase 3
ENST00000436936	NLRC5	0.000114623	0.00174888	3.3712	0.873968	5.35716	6.47011	1.82439	1.61281	0.0226493	1.61281	ENSG00000140853	NLRC5	29.1135	GO:0043549	regulation of kinase activity	Any process that modulates the frequency, rate or extent of kinase activity, the catalysis of the transfer of a phosphate group, usually from ATP, to a substrate molecule. [GOC:bf]	NLR family, CARD domain containing 5	negative regulation of innate immune response
ENST00000415497	CCND3	1.14881e-08	5.07631e-07	3.36808	0.59015	3.5113	8.23118	1.16955	0.3977	0.111173	0.3977	ENSG00000112576	CCND3	29.0227	GO:0045737	positive regulation of cyclin-dependent protein serine/threonine kinase activity	Any process that activates or increases the frequency, rate or extent of CDK activity. [GOC:go_curators, GOC:pr]	cyclin D3
ENST00000603323	HEATR9	3.9412e-10	2.23462e-08	3.36343	0.537604	1.07575	3.11542	0.332131	-0.1953	0.968452	0.968452	ENSG00000270379	HEATR9	28.8882	GO:0005488	binding	The selective, non-covalent, often stoichiometric, interaction of a molecule with one or more specific sites on another molecule. [GOC:ceb, GOC:mah, ISBN:0198506732]	HEAT repeat containing 9
ENST00000398997	MED18	3.58254e-06	8.6416e-05	3.35874	0.724766	1.42987	4.98036	1.60465	0.632133	0.759138	0.759138	ENSG00000130772	MED18	28.753	GO:0070847	core mediator complex	A protein complex that interacts with the carboxy-terminal domain of the largest subunit of RNA polymerase II and plays an active role in transducing the signal from a transcription factor to the transcriptional machinery. The core mediator complex has a stimulatory effect on basal transcription, and contains most of the same subdomains as the larger form of mediator complex -- a head domain comp…	mediator complex subunit 18
ENST00000575147	XAF1	1.16449e-14	1.30777e-12	3.34517	0.43332	1.58105	3.55598	0.164431	0.508579	0.680518	0.680518	ENSG00000132530	XAF1	28.3655	GO:0005515	protein binding	Interacting selectively and non-covalently with any protein or protein complex (a complex of two or more proteins that may include other nonprotein molecules). [GOC:go_curators]	XIAP associated factor 1
ENST00000544101	SLC15A3	2.44057e-12	1.98852e-10	3.33935	0.476596	2.11553	3.57691	0.574145	0.0338075	0.448	0.448	ENSG00000110446	SLC15A3	28.2008	GO:0006810	transport	The directed movement of substances (such as macromolecules, small molecules, ions) into, out of or within a cell, or between cells, or within a multicellular organism by means of some agent such as a transporter or pore. [GOC:dph, GOC:jl, GOC:mah]	solute carrier family 15 (oligopeptide transporter), member 3
ENST00000471785	PARP9	3.57072e-10	2.04138e-08	3.33432	0.531643	6.22002	5.04638	1.25558	-0.353259	0.0163171	0.0163171	ENSG00000138496	PARP9	28.0593	GO:0060330	regulation of response to interferon-gamma	Any process that modulates the rate, frequency or extent of a response to interferon-gamma. Response to interferon gamma is a change in state or activity of a cell or an organism (in terms of movement, secretion, enzyme production, gene expression, etc.) as a result of an interferon-gamma stimulus. [GOC:dph]	poly(ADP-ribose) polymerase family member 9	double-strand break repair
ENST00000538992	ETV7	1.28622e-06	3.47583e-05	3.32529	0.686778	1.62295	3.81781	1.46271	-0.582058	0.659777	0.659777	ENSG00000010030	ETV7	27.8071	GO:0009887	organ morphogenesis	Morphogenesis of an organ. An organ is defined as a tissue or set of tissues that work together to perform a specific function or functions. Morphogenesis is the process in which anatomical structures are generated and organized. Organs are commonly observed as visibly distinct structures, but may also exist as loosely associated clusters of cells that work together to perform a specific function…	ets variant 7
ENST00000529924	IL10RA	4.16453e-10	2.35067e-08	3.32306	0.531883	0.968383	3.16957	0.233511	-0.0465013	1.03953	1.03953	ENSG00000110324	IL10RA	27.7451	GO:0005515	protein binding	Interacting selectively and non-covalently with any protein or protein complex (a complex of two or more proteins that may include other nonprotein molecules). [GOC:go_curators]	interleukin 10 receptor subunit alpha	Autosomal recessive early-onset inflammatory bowel disease
ENST00000584386	LGALS9	2.87155e-07	9.13647e-06	3.32012	0.646984	1.80283	4.8023	0.622454	1.26119	0.57567	1.26119	ENSG00000168961	LGALS9	27.6637	GO:2001269	positive regulation of cysteine-type endopeptidase activity involved in apoptotic signaling pathway	Any process that activates or increases the frequency, rate or extent of cysteine-type endopeptidase activity involved in apoptotic signaling pathway. [GOC:mtg_apoptosis]	lectin, galactoside-binding, soluble, 9	cellular response to virus
ENST00000295908	PPM1K	1.97226e-07	6.55339e-06	3.32004	0.638233	3.07684	5.02782	1.14231	0.690729	0.186017	0.690729	ENSG00000163644	PPM1K	27.6616	GO:0009083	branched-chain amino acid catabolic process	The chemical reactions and pathways resulting in the breakdown of amino acids containing a branched carbon skeleton, comprising isoleucine, leucine and valine. [GOC:ai]	protein phosphatase, Mg2+/Mn2+ dependent 1K	Intermediate maple syrup urine disease
ENST00000452932	RP11-820K3.2	2.24488e-13	2.11083e-11	3.3147	0.452004	1.3485	3.10678	0.115375	0.0819303	0.80401	0.80401	ENSG00000225349	RP11-820K3.2	27.5141
ENST00000494212	UBA7	9.59895e-08	3.40794e-06	3.31297	0.621085	2.29025	4.57748	1.34881	-1.02868	0.387051	0.387051	ENSG00000182179	UBA7	27.4665	GO:0019782	ISG15 activating enzyme activity	Catalysis of the activation of the small ubiquitin-related modifier ISG15, through the formation of an ATP-dependent high-energy thiolester bond. [GOC:mah]	ubiquitin-like modifier activating enzyme 7
ENST00000550883	OAS1	1.64726e-08	6.9813e-07	3.31137	0.586553	1.38226	3.40991	0.763033	-0.189334	0.785169	0.785169	ENSG00000089127	OAS1	27.4227	GO:0060700	regulation of ribonuclease activity	Any process that modulates the rate, frequency, or extent of ribonuclease activity, catalysis of the hydrolysis of phosphodiester bonds in chains of RNA. [GOC:dph, GOC:tb]	2'-5'-oligoadenylate synthetase 1	glucose homeostasis
ENST00000600428	TRIP10	9.73508e-10	5.20394e-08	3.30989	0.54139	1.63592	4.10667	0.509121	0.809841	0.653446	0.809841	ENSG00000125733	TRIP10	27.3821	GO:0005515	protein binding	Interacting selectively and non-covalently with any protein or protein complex (a complex of two or more proteins that may include other nonprotein molecules). [GOC:go_curators]	thyroid hormone receptor interactor 10
ENST00000321535	FBXO39	2.00187e-14	2.1897e-12	3.30949	0.432585	1.48007	3.30989	0.109723	0.299596	0.73236	0.73236	ENSG00000177294	FBXO39	27.3712	GO:0031146	SCF-dependent proteasomal ubiquitin-dependent protein catabolic process	The chemical reactions and pathways resulting in the breakdown of a protein or peptide by hydrolysis of its peptide bonds, initiated by the covalent attachment of ubiquitin, with ubiquitin-protein ligation catalyzed by an SCF (Skp1/Cul1/F-box protein) complex, and mediated by the proteasome. [PMID:15380083]	F-box protein 39
ENST00000498479	RC3H2	0.000306971	0.00402243	3.30778	0.91645	4.11512	6.68441	1.89079	1.88867	0.0567128	1.88867	ENSG00000056586	RC3H2	27.3245	GO:0009986	cell surface	The external part of the cell wall and/or plasma membrane. [GOC:jl, GOC:mtg_sensu, GOC:sm]	ring finger and CCCH-type domains 2	protein polyubiquitination
ENST00000482772	PPIG	3.41749e-10	1.9597e-08	3.30386	0.526213	2.45431	4.42893	0.910403	0.254712	0.335649	0.335649	ENSG00000138398	PPIG	27.2174	GO:0016018	cyclosporin A binding	Interacting selectively and non-covalently with cyclosporin A, a cyclic undecapeptide that contains several N-methylated and unusual amino acids. [GOC:mb]	peptidylprolyl isomerase G (cyclophilin G)
ENST00000344113	SYNE2	0.00052695	0.00636554	3.30019	0.951976	3.95905	6.72206	2.7964	1.28176	0.0669996	1.28176	ENSG00000054654	SYNE2	27.1177	GO:0031022	nuclear migration along microfilament	The directed movement of the nucleus along microfilaments within the cell, mediated by motor proteins. [GOC:mah]	spectrin repeat containing, nuclear envelope 2	Autosomal dominant Emery-Dreifuss muscular dystrophy
ENST00000502931	STARD4	1.28484e-06	3.47538e-05	3.2985	0.681216	1.32526	4.14826	1.27108	0.154044	0.817167	0.817167	ENSG00000164211	STARD4	27.0721	GO:0016023	cytoplasmic membrane-bounded vesicle	A membrane-bounded vesicle found in the cytoplasm of the cell. [GOC:ai, GOC:mah]	StAR related lipid transfer domain containing 4
ENST00000355754	GBP4	5.74664e-47	5.24073e-44	3.29027	0.228606	5.83346	3.66518	0.0107215	0.224451	0.018854	0.224451	ENSG00000162654	GBP4	26.85	GO:0048471	perinuclear region of cytoplasm	Cytoplasm situated near, or occurring around, the nucleus. [GOC:jid]	guanylate binding protein 4
ENST00000592024	DHX58	3.14077e-31	1.26454e-28	3.28693	0.28279	3.24619	3.15462	0.206195	0.0231999	0.15367	0.15367	ENSG00000108771	DHX58	26.7606				DEXH (Asp-Glu-X-His) box polypeptide 58	negative regulation of MDA-5 signaling pathway
ENST00000536969	IFI35	5.3925e-10	3.00128e-08	3.26705	0.52633	1.28488	3.63471	0.406207	0.49696	0.840396	0.840396	ENSG00000068079	IFI35	26.2339	GO:0060337	type I interferon signaling pathway	A series of molecular signals initiated by the binding of a type I interferon to a receptor on the surface of a cell, and ending with regulation of a downstream cellular process, e.g. transcription. Type I interferons include the interferon-alpha, beta, delta, episilon, zeta, kappa, tau, and omega gene families. [GOC:add, GOC:dph, GOC:signaling, PR:000025848]	interferon induced protein 35
ENST00000485662	IFI44	7.11514e-14	7.17132e-12	3.26546	0.436225	4.00793	3.6298	0.220828	0.635488	0.0635761	0.635488	ENSG00000137965	IFI44	26.1922	GO:0009615	response to virus	Any process that results in a change in state or activity of a cell or an organism (in terms of movement, secretion, enzyme production, gene expression, etc.) as a result of a stimulus from a virus. [GOC:hb]	interferon induced protein 44
ENST00000555567	PGF	2.59685e-07	8.37508e-06	3.26134	0.6332	2.31435	4.27594	1.42505	0.163121	0.379192	0.379192	ENSG00000119630	PGF	26.0846	GO:0007267	cell-cell signaling	Any process that mediates the transfer of information from one cell to another. [GOC:mah]	placental growth factor	growth factor activity
ENST00000558056	TNFAIP2	4.60338e-17	6.68798e-15	3.25987	0.388245	2.27569	3.43013	0.273767	0.404538	0.39185	0.404538	ENSG00000185215	TNFAIP2	26.0461				TNF alpha induced protein 2
ENST00000514182	CSRNP1	0.000237802	0.00324957	3.25874	0.886719	3.89728	5.97274	1.43954	2.09867	0.0716008	2.09867	ENSG00000144655	CSRNP1	26.0166	GO:0003674	molecular_function	Elemental activities, such as catalysis or binding, describing the actions of a gene product at the molecular level. A given gene product may exhibit one or more molecular functions. [GOC:go_curators]	cysteine-serine-rich nuclear protein 1
ENST00000377050	UBD	1.80437e-08	7.5583e-07	3.25688	0.578509	1.42934	4.41759	0.439857	1.06617	0.759422	1.06617	ENSG00000213886	UBD	25.9684	GO:0070842	aggresome assembly	The aggregation, arrangement and bonding together of a set of components to form an aggresome; requires the microtubule cytoskeleton and dynein. [GOC:BHF, GOC:rl, PMID:14675537]	ubiquitin D	myeloid dendritic cell differentiation
ENST00000278407	SERPING1	0.000167304	0.00241628	3.25549	0.864931	3.55961	9.25595	1.85346	1.51302	0.104783	1.51302	ENSG00000149131	SERPING1	25.9322	GO:0005615	extracellular space	That part of a multicellular organism outside the cells proper, usually taken to be outside the plasma membranes, and occupied by fluid. [ISBN:0198547684]	serpin peptidase inhibitor, clade G (C1 inhibitor), member 1	Hereditary angioedema type 1
ENST00000470515	PARP12	6.25504e-15	7.2617e-13	3.2535	0.417185	2.02424	3.54033	0.175923	0.607273	0.482803	0.607273	ENSG00000059378	PARP12	25.8808	GO:0044822	poly(A) RNA binding	Interacting non-covalently with a poly(A) RNA, a RNA molecule which has a tail of adenine bases. [GOC:jl]	poly(ADP-ribose) polymerase family member 12
ENST00000357122	SPAG9	0.000773415	0.00872543	3.25195	0.967228	6.10483	9.90779	0.0156817	4.1942	0.0169347	4.1942	ENSG00000008294	SPAG9	25.8408	GO:0008432	JUN kinase binding	Interacting selectively and non-covalently with JUN kinase, an enzyme that catalyzes the phosphorylation and activation of members of the JUN family. [GOC:jl]	sperm associated antigen 9	positive regulation of cell migration
ENST00000371852	CH25H	2.47778e-31	1.00833e-28	3.24973	0.279104	3.16175	3.15387	0.181102	-0.00678284	0.169444	0.169444	ENSG00000138135	CH25H	25.7835	GO:0008395	steroid hydroxylase activity	Catalysis of the formation of a hydroxyl group on a steroid by incorporation of oxygen from O2. [ISBN:0721662544]	cholesterol 25-hydroxylase
ENST00000397559	PDZD2	4.60088e-09	2.18341e-07	3.24931	0.554395	1.56496	3.10787	0.694491	-0.340259	0.6886	0.6886	ENSG00000133401	PDZD2	25.7725	GO:0005515	protein binding	Interacting selectively and non-covalently with any protein or protein complex (a complex of two or more proteins that may include other nonprotein molecules). [GOC:go_curators]	PDZ domain containing 2
ENST00000484074	FNDC3A	8.8098e-05	0.00139628	3.23543	0.825107	3.51816	6.51001	2.76585	0.29776	0.110238	0.29776	ENSG00000102531	FNDC3A	25.4174	GO:0044822	poly(A) RNA binding	Interacting non-covalently with a poly(A) RNA, a RNA molecule which has a tail of adenine bases. [GOC:jl]	fibronectin type III domain containing 3A
ENST00000445206	TRIM39	4.82056e-05	0.000831547	3.23493	0.795965	2.0973	5.77109	2.39623	0.324419	0.454787	0.454787	ENSG00000226437	TRIM39	25.4046	GO:0005515	protein binding	Interacting selectively and non-covalently with any protein or protein complex (a complex of two or more proteins that may include other nonprotein molecules). [GOC:go_curators]	TRIM39-RPP21 readthrough
ENST00000621391	IRF7	1.04154e-10	6.61383e-09	3.23478	0.500678	4.73662	4.96519	0.515808	0.612247	0.0313897	0.612247	ENSG00000276561	IRF7	25.4008	GO:0005515	protein binding	Interacting selectively and non-covalently with any protein or protein complex (a complex of two or more proteins that may include other nonprotein molecules). [GOC:go_curators]	interferon regulatory factor 7	DNA binding
ENST00000560670	TNFAIP2	1.3088e-08	5.68044e-07	3.23118	0.568378	3.254	4.23189	0.795839	0.657904	0.152257	0.657904	ENSG00000185215	TNFAIP2	25.3095				TNF alpha induced protein 2
ENST00000255432	LGR6	1.40389e-06	3.7536e-05	3.22308	0.668071	1.8133	3.8657	1.43742	-0.199945	0.571012	0.571012	ENSG00000133067	LGR6	25.1052	GO:0030177	positive regulation of Wnt signaling pathway	Any process that activates or increases the frequency, rate or extent of Wnt signal transduction. [GOC:dph, GOC:go_curators, GOC:tb]	leucine-rich repeat containing G protein-coupled receptor 6
ENST00000476911	IFI44	1.46624e-13	1.40665e-11	3.22135	0.435895	3.99019	3.58156	0.144641	0.71038	0.0647963	0.71038	ENSG00000137965	IFI44	25.0618	GO:0009615	response to virus	Any process that results in a change in state or activity of a cell or an organism (in terms of movement, secretion, enzyme production, gene expression, etc.) as a result of a stimulus from a virus. [GOC:hb]	interferon induced protein 44
ENST00000484970	GBP1	1.40958e-09	7.31289e-08	3.21558	0.531116	2.07655	3.86143	0.620042	0.649335	0.462611	0.649335	ENSG00000117228	GBP1	24.9177	GO:0050848	regulation of calcium-mediated signaling	Any process that modulates the frequency, rate or extent of calcium-mediated signaling, the process in which a cell uses calcium ions to convert an extracellular signal into a response. [GOC:ai]	guanylate binding protein 1, interferon-inducible	negative regulation of ERK1 and ERK2 cascade
ENST00000227752	IL10RA	1.48787e-17	2.27416e-15	3.21457	0.37694	2.39376	3.41187	0.285338	0.204828	0.354038	0.354038	ENSG00000110324	IL10RA	24.8927	GO:0005515	protein binding	Interacting selectively and non-covalently with any protein or protein complex (a complex of two or more proteins that may include other nonprotein molecules). [GOC:go_curators]	interleukin 10 receptor subunit alpha	Autosomal recessive early-onset inflammatory bowel disease
ENST00000613338	MAP2K3	4.82618e-05	0.000832327	3.21338	0.790716	3.26026	5.33944	0.999108	1.81443	0.151131	1.81443	ENSG00000034152	MAP2K3	24.863				mitogen-activated protein kinase kinase 3
ENST00000478401	TRIM14	2.98537e-12	2.4014e-10	3.20659	0.459501	1.54751	3.28587	0.252693	0.385144	0.697442	0.697442	ENSG00000106785	TRIM14	24.6946	GO:0032897	negative regulation of viral transcription	Any process that stops, prevents, or reduces the frequency, rate or extent of viral transcription. [GOC:mah]	tripartite motif containing 14
ENST00000533640	NPIPB6	2.83712e-07	9.03382e-06	3.20332	0.623947	2.09053	4.32082	0.500188	1.25171	0.457328	1.25171	ENSG00000198156	NPIPB6	24.614				nuclear pore complex interacting protein family member B6
ENST00000336119	NLRP3	2.2308e-09	1.12197e-07	3.18469	0.532553	1.86575	3.72832	0.728187	0.38617	0.548069	0.548069	ENSG00000162711	NLRP3	24.1597	GO:0009595	detection of biotic stimulus	The series of events in which a biotic stimulus, one caused or produced by a living organism, is received and converted into a molecular signal. [GOC:hb]	NLR family, pyrin domain containing 3	CINCA SYNDROME
ENST00000507059	FLT4	9.95629e-12	7.36678e-10	3.18079	0.467273	1.43758	3.31297	0.22757	0.411825	0.75498	0.75498	ENSG00000037280	FLT4	24.0658	GO:0001946	lymphangiogenesis	Lymph vessel formation when new vessels emerge from the proliferation of pre-existing vessels. [GOC:dph, PMID:11596157]	fms-related tyrosine kinase 4	Milroy Disease
ENST00000267015	GPR84	2.1564e-13	2.03268e-11	3.18022	0.433348	1.58985	3.30282	0.168936	0.43274	0.676121	0.676121	ENSG00000139572	GPR84	24.0521	GO:0007200	phospholipase C-activating G-protein coupled receptor signaling pathway	The series of molecular signals generated as a consequence of a G-protein coupled receptor binding to its physiological ligand, where the pathway proceeds with activation of phospholipase C (PLC) and a subsequent increase in the concentration of inositol trisphosphate (IP3) and diacylglycerol (DAG). [GOC:dph, GOC:mah, GOC:signaling, GOC:tb, ISBN:0815316194]	G protein-coupled receptor 84
ENST00000470479	CMPK2	1.86051e-10	1.13024e-08	3.16856	0.49723	1.05856	2.92397	0.132986	0.125671	0.979582	0.979582	ENSG00000134326	CMPK2	23.7733	GO:0033862	UMP kinase activity	Catalysis of the reaction: ATP + UMP = ADP + UDP. [EC:2.7.4.22]	cytidine monophosphate (UMP-CMP) kinase 2, mitochondrial
ENST00000590563	LSM12	7.88017e-09	3.59538e-07	3.16699	0.548776	1.57885	3.85171	0.574315	0.780883	0.681615	0.780883	ENSG00000161654	LSM12	23.7359				LSM12 homolog
ENST00000419411	CFB	2.8381e-07	9.03382e-06	3.16593	0.616673	3.07551	6.76064	0.738041	0.973242	0.186281	0.973242	ENSG00000242335	CFB	23.7108	GO:0030449	regulation of complement activation	Any process that modulates the frequency, rate or extent of complement activation. [GOC:go_curators]	complement factor B	COMPLEMENT FACTOR B DEFICIENCY
ENST00000427888	CFB	2.8381e-07	9.03382e-06	3.16593	0.616673	3.07551	6.76064	0.738041	0.973242	0.186281	0.973242	ENSG00000239754	CFB	23.7108	GO:0030449	regulation of complement activation	Any process that modulates the frequency, rate or extent of complement activation. [GOC:go_curators]	complement factor B	COMPLEMENT FACTOR B DEFICIENCY
ENST00000433503	CFB	2.8381e-07	9.03382e-06	3.16593	0.616673	3.07551	6.76064	0.738041	0.973242	0.186281	0.973242	ENSG00000241534	CFB	23.7108	GO:0030449	regulation of complement activation	Any process that modulates the frequency, rate or extent of complement activation. [GOC:go_curators]	complement factor B	COMPLEMENT FACTOR B DEFICIENCY
ENST00000436692	CFB	2.8381e-07	9.03382e-06	3.16593	0.616673	3.07551	6.76064	0.738041	0.973242	0.186281	0.973242	ENSG00000243570	CFB	23.7108	GO:0030449	regulation of complement activation	Any process that modulates the frequency, rate or extent of complement activation. [GOC:go_curators]	complement factor B	COMPLEMENT FACTOR B DEFICIENCY
ENST00000556028	EIF2B2	1.3995e-06	3.74584e-05	3.16204	0.655335	2.07809	5.57491	1.2256	0.706989	0.462027	0.706989	ENSG00000119718	EIF2B2	23.6187	GO:0051716	cellular response to stimulus	Any process that results in a change in state or activity of a cell (in terms of movement, secretion, enzyme production, gene expression, etc.) as a result of a stimulus. The process begins with detection of the stimulus by a cell and ends with a change in state or activity or the cell. [GOC:bf, GOC:jl]	eukaryotic translation initiation factor 2B subunit beta	Congenital or early infantile CACH syndrome
ENST00000395514	GCH1	3.51584e-08	1.38175e-06	3.15856	0.572869	1.20872	4.15216	0.591304	0.481328	0.885499	0.885499	ENSG00000131979	GCH1	23.5368	GO:0050884	neuromuscular process controlling posture	Any process in which an organism voluntarily modulates its posture, the alignment of its anatomical parts. [GOC:dph, GOC:tb]	GTP cyclohydrolase 1	Autosomal dominant dopa-responsive dystonia
ENST00000495254	IFI44	2.97615e-13	2.71415e-11	3.15682	0.43271	4.33351	4.29039	0.362229	0.480341	0.0452408	0.480341	ENSG00000137965	IFI44	23.4958	GO:0009615	response to virus	Any process that results in a change in state or activity of a cell or an organism (in terms of movement, secretion, enzyme production, gene expression, etc.) as a result of a stimulus from a virus. [GOC:hb]	interferon induced protein 44
ENST00000528797	YPEL4	3.88617e-05	0.000688406	3.15356	0.766516	1.26339	4.32789	1.79102	0.0602397	0.852948	0.852948	ENSG00000166793	YPEL4	23.4193				yippee like 4
ENST00000545081	NLRC5	2.9794e-05	0.000547028	3.15323	0.755259	3.16875	5.06384	1.44521	1.12166	0.168104	1.12166	ENSG00000140853	NLRC5	23.4116	GO:0043549	regulation of kinase activity	Any process that modulates the frequency, rate or extent of kinase activity, the catalysis of the transfer of a phosphate group, usually from ATP, to a substrate molecule. [GOC:bf]	NLR family, CARD domain containing 5	negative regulation of innate immune response
ENST00000447291	IL15RA	1.51012e-10	9.31587e-09	3.14486	0.491051	1.96538	3.61319	0.578765	0.50361	0.506325	0.506325	ENSG00000134470	IL15RA	23.2165	GO:0016021	integral component of membrane	The component of a membrane consisting of the gene products and protein complexes having at least some part of their peptide sequence embedded in the hydrophobic region of the membrane. [GOC:dos, GOC:go_curators]	interleukin 15 receptor subunit alpha
ENST00000394339	SPRY1	1.04076e-08	4.64222e-07	3.14379	0.549235	3.53346	3.84395	0.836778	0.520687	0.108187	0.520687	ENSG00000164056	SPRY1	23.1916	GO:0001759	organ induction	The interaction of two or more cells or tissues that causes them to change their fates and specify the development of an organ. [ISBN:0878932437]	sprouty RTK signaling antagonist 1
ENST00000476284	TYMP	1.7133e-09	8.7566e-08	3.14184	0.52165	1.24313	3.01936	0.359628	0.0158219	0.864906	0.864906	ENSG00000025708	TYMP	23.1464	GO:0016154	pyrimidine-nucleoside phosphorylase activity	Catalysis of the reaction: pyrimidine nucleoside + phosphate = pyrimidine + alpha-D-ribose 1-phosphate. [EC:2.4.2.2]	thymidine phosphorylase	Mitochondrial neurogastrointestinal encephalomyopathy
ENST00000573760	XAF1	1.7102e-09	8.74661e-08	3.13768	0.520934	1.77678	3.41179	0.633807	0.273499	0.587369	0.587369	ENSG00000132530	XAF1	23.0504	GO:0005515	protein binding	Interacting selectively and non-covalently with any protein or protein complex (a complex of two or more proteins that may include other nonprotein molecules). [GOC:go_curators]	XIAP associated factor 1
ENST00000438486	IFI44	1.74388e-06	4.558e-05	3.13409	0.655524	1.63946	3.79555	1.28197	-0.0329726	0.651729	0.651729	ENSG00000137965	IFI44	22.9677	GO:0009615	response to virus	Any process that results in a change in state or activity of a cell or an organism (in terms of movement, secretion, enzyme production, gene expression, etc.) as a result of a stimulus from a virus. [GOC:hb]	interferon induced protein 44
ENST00000575369	XAF1	2.2529e-13	2.11574e-11	3.13265	0.427207	3.75645	3.38471	0.0880377	0.733238	0.0833073	0.733238	ENSG00000132530	XAF1	22.9346	GO:0005515	protein binding	Interacting selectively and non-covalently with any protein or protein complex (a complex of two or more proteins that may include other nonprotein molecules). [GOC:go_curators]	XIAP associated factor 1
ENST00000405964	C21orf91	7.22372e-06	0.000160395	3.13006	0.697585	1.95101	3.63815	1.67762	-0.537035	0.512196	0.512196	ENSG00000154642	C21orf91	22.8752				chromosome 21 open reading frame 91
ENST00000515012	ZBTB49	2.1749e-05	0.00041836	3.12965	0.737058	2.56865	4.75341	1.46002	0.984623	0.302823	0.984623	ENSG00000168826	ZBTB49	22.8659	GO:0005515	protein binding	Interacting selectively and non-covalently with any protein or protein complex (a complex of two or more proteins that may include other nonprotein molecules). [GOC:go_curators]	zinc finger and BTB domain containing 49
ENST00000461483	CFB	5.63008e-16	7.37297e-14	3.12914	0.386453	1.71338	2.85326	0.0555408	0.0369582	0.616517	0.616517	ENSG00000243649	CFB	22.8543				complement factor B	Atypical hemolytic uremic syndrome with B factor anomaly
ENST00000461626	CFB	5.63008e-16	7.37297e-14	3.12914	0.386453	1.71338	2.85326	0.0555408	0.0369582	0.616517	0.616517	ENSG00000241253	CFB	22.8543	GO:0030449	regulation of complement activation	Any process that modulates the frequency, rate or extent of complement activation. [GOC:go_curators]	complement factor B	COMPLEMENT FACTOR B DEFICIENCY
ENST00000472676	CFB	5.63008e-16	7.37297e-14	3.12914	0.386453	1.71338	2.85326	0.0555408	0.0369582	0.616517	0.616517	ENSG00000243570	CFB	22.8543	GO:0030449	regulation of complement activation	Any process that modulates the frequency, rate or extent of complement activation. [GOC:go_curators]	complement factor B	COMPLEMENT FACTOR B DEFICIENCY
ENST00000474773	CFB	5.63008e-16	7.37297e-14	3.12914	0.386453	1.71338	2.85326	0.0555408	0.0369582	0.616517	0.616517	ENSG00000239754	CFB	22.8543	GO:0030449	regulation of complement activation	Any process that modulates the frequency, rate or extent of complement activation. [GOC:go_curators]	complement factor B	COMPLEMENT FACTOR B DEFICIENCY
ENST00000475203	CFB	5.63008e-16	7.37297e-14	3.12914	0.386453	1.71338	2.85326	0.0555408	0.0369582	0.616517	0.616517	ENSG00000241534	CFB	22.8543	GO:0030449	regulation of complement activation	Any process that modulates the frequency, rate or extent of complement activation. [GOC:go_curators]	complement factor B	COMPLEMENT FACTOR B DEFICIENCY
ENST00000485663	CFB	5.63008e-16	7.37297e-14	3.12914	0.386453	1.71338	2.85326	0.0555408	0.0369582	0.616517	0.616517	ENSG00000242335	CFB	22.8543	GO:0030449	regulation of complement activation	Any process that modulates the frequency, rate or extent of complement activation. [GOC:go_curators]	complement factor B	COMPLEMENT FACTOR B DEFICIENCY
ENST00000611155	XBP1	3.1105e-07	9.79789e-06	3.1259	0.610931	5.32856	4.14025	0.560656	1.11891	0.0228905	1.11891	ENSG00000100219	XBP1	22.7805	GO:1990418	response to insulin-like growth factor stimulus	Any process that results in a change in state or activity of a cell or an organism (in terms of movement, secretion, enzyme production, gene expression, etc.) as a result of an insulin-like growth factor stimulus. [PMID:21932665]	X-box binding protein 1	positive regulation of MHC class II biosynthetic process
ENST00000572495	XAF1	3.00653e-14	3.19177e-12	3.12199	0.410894	2.80123	3.38334	0.315882	0.443869	0.243802	0.443869	ENSG00000132530	XAF1	22.6914	GO:0005515	protein binding	Interacting selectively and non-covalently with any protein or protein complex (a complex of two or more proteins that may include other nonprotein molecules). [GOC:go_curators]	XIAP associated factor 1
ENST00000552941	CHURC1-FNTB	0.00013037	0.00195061	3.11878	0.815205	2.80797	5.27228	1.46037	1.53014	0.242244	1.53014	ENSG00000125954	CHURC1-FNTB	22.6187	GO:0045893	positive regulation of transcription, DNA-templated	Any process that activates or increases the frequency, rate or extent of cellular DNA-templated transcription. [GOC:go_curators, GOC:txnOH]	CHURC1-FNTB readthrough
ENST00000372690	SAMD8	0.000399735	0.0050395	3.11468	0.879788	1.978	6.66636	1.29748	2.18565	0.50121	2.18565	ENSG00000156671	SAMD8	22.5262	GO:0005515	protein binding	Interacting selectively and non-covalently with any protein or protein complex (a complex of two or more proteins that may include other nonprotein molecules). [GOC:go_curators]	sterile alpha motif domain containing 8
ENST00000526464	IL32	1.32144e-10	8.22566e-09	3.09798	0.4822	2.91413	3.58405	0.671384	0.374943	0.218845	0.374943	ENSG00000008517	IL32	22.1532	GO:0006952	defense response	Reactions, triggered in response to the presence of a foreign body or the occurrence of an injury, which result in restriction of damage to the organism attacked or prevention/recovery from the infection caused by the attack. [GOC:go_curators]	interleukin 32
ENST00000581864	SECTM1	1.6163e-15	1.99255e-13	3.09443	0.388371	3.09964	3.07029	0.497232	-0.00243928	0.181514	0.181514	ENSG00000141574	SECTM1	22.0748	GO:0007498	mesoderm development	The process whose specific outcome is the progression of the mesoderm over time, from its formation to the mature structure. The mesoderm is the middle germ layer that develops into muscle, bone, cartilage, blood and connective tissue. [GOC:dph, GOC:tb]	secreted and transmembrane 1	positive regulation of I-kappaB kinase/NF-kappaB signaling
ENST00000546325	IFI35	5.60508e-13	4.9738e-11	3.092	0.428863	1.98564	3.57656	0.32952	0.257797	0.498135	0.498135	ENSG00000068079	IFI35	22.021	GO:0060337	type I interferon signaling pathway	A series of molecular signals initiated by the binding of a type I interferon to a receptor on the surface of a cell, and ending with regulation of a downstream cellular process, e.g. transcription. Type I interferons include the interferon-alpha, beta, delta, episilon, zeta, kappa, tau, and omega gene families. [GOC:add, GOC:dph, GOC:signaling, PR:000025848]	interferon induced protein 35
ENST00000379868	DDX58	1.3028e-06	3.51435e-05	3.09168	0.638865	5.11713	4.2584	1.32234	0.51433	0.0249698	0.51433	ENSG00000107201	DDX58	22.0139	GO:0016817	hydrolase activity, acting on acid anhydrides	Catalysis of the hydrolysis of any acid anhydride. [GOC:jl]	DEAD (Asp-Glu-Ala-Asp) box polypeptide 58	Singleton-Merten dysplasia
ENST00000467638	PARP12	1.14633e-10	7.20673e-09	3.09021	0.479379	1.172	2.77743	0.126256	0.139107	0.907861	0.907861	ENSG00000059378	PARP12	21.9816	GO:0044822	poly(A) RNA binding	Interacting non-covalently with a poly(A) RNA, a RNA molecule which has a tail of adenine bases. [GOC:jl]	poly(ADP-ribose) polymerase family member 12
ENST00000479389	RIPK1	4.9181e-05	0.000845867	3.08374	0.759638	1.61861	4.81739	1.32376	1.27296	0.661907	1.27296	ENSG00000137275	RIPK1	21.8399	GO:0097343	ripoptosome assembly	The aggregation, arrangement and bonding together of a set of components to form a ripoptosome, a protein complex whose formation can induce an extrinsic apoptotic signaling pathway or a necroptotic signaling pathway. The composition of this protein complex may depend on several factors including nature of the signal, cell type and more. [GOC:mtg_apoptosis, PMID:22274400]	receptor interacting serine/threonine kinase 1	amyloid fibril formation
ENST00000413316	ACSL3	7.97735e-10	4.33474e-08	3.07831	0.500915	1.6258	3.45522	0.470738	0.264289	0.658384	0.658384	ENSG00000123983	ACSL3	21.7217	GO:2001247	positive regulation of phosphatidylcholine biosynthetic process	Any process that activates or increases the frequency, rate or extent of phosphatidylcholine biosynthetic process. [GOC:obol]	acyl-CoA synthetase long-chain family member 3	very long-chain fatty acid metabolic process
ENST00000472152	IFI44	7.12971e-16	9.22512e-14	3.07716	0.38139	3.40109	3.09804	0.423138	0.231426	0.127374	0.231426	ENSG00000137965	IFI44	21.6968	GO:0009615	response to virus	Any process that results in a change in state or activity of a cell or an organism (in terms of movement, secretion, enzyme production, gene expression, etc.) as a result of a stimulus from a virus. [GOC:hb]	interferon induced protein 44
ENST00000491598	PARP12	7.64027e-11	4.93022e-09	3.07393	0.472367	2.59054	3.33945	0.70726	0.231695	0.296826	0.296826	ENSG00000059378	PARP12	21.6268	GO:0044822	poly(A) RNA binding	Interacting non-covalently with a poly(A) RNA, a RNA molecule which has a tail of adenine bases. [GOC:jl]	poly(ADP-ribose) polymerase family member 12
ENST00000375775	ING1	3.47217e-06	8.41021e-05	3.0711	0.661774	3.33114	5.42432	0.571952	1.3988	0.138775	1.3988	ENSG00000153487	ING1	21.5656	GO:0030308	negative regulation of cell growth	Any process that stops, prevents, or reduces the frequency, rate, extent or direction of cell growth. [GOC:go_curators]	inhibitor of growth family member 1	Squamous cell carcinoma of head and neck
ENST00000446486	IFI44	4.34044e-43	3.22099e-40	3.06557	0.222763	3.98258	2.70516	0.157977	0.0230009	0.065328	0.065328	ENSG00000137965	IFI44	21.4466	GO:0009615	response to virus	Any process that results in a change in state or activity of a cell or an organism (in terms of movement, secretion, enzyme production, gene expression, etc.) as a result of a stimulus from a virus. [GOC:hb]	interferon induced protein 44
ENST00000396582	ARHGAP5	2.31712e-06	5.86275e-05	3.06161	0.648153	1.13847	3.70055	0.961818	0.309152	0.928643	0.928643	ENSG00000100852	ARHGAP5	21.362				Rho GTPase activating protein 5
ENST00000369039	ADAMTSL4	4.28334e-11	2.88965e-09	3.06124	0.464252	2.10972	4.45522	0.519732	0.383053	0.450151	0.450151	ENSG00000143382	ADAMTSL4	21.3541	GO:0036066	protein O-linked fucosylation	The process of transferring a fucosyl group to a serine or threonine residues in a protein acceptor molecule, to form an O-linked protein-sugar linkage. [GOC:sart, PMID:19948734]	ADAMTS like 4	isolated ectopia lentis (EL)
ENST00000370082	HELZ2	4.91934e-09	2.3258e-07	3.05774	0.522702	3.19735	3.65938	0.330899	0.898579	0.162691	0.898579	ENSG00000130589	HELZ2	21.2795	GO:0030374	ligand-dependent nuclear receptor transcription coactivator activity	The function of a transcription cofactor that activates transcription in conjuction with a ligand-dependent nuclear receptor from a RNA polymerase II promoter; does not bind DNA itself. [GOC:dph, GOC:tb]	helicase with zinc finger 2, transcriptional coactivator
ENST00000246911	IFI35	1.71013e-35	9.0521e-33	3.04841	0.245169	4.70938	2.81764	0.238415	-0.1423	0.0320692	0.0320692	ENSG00000068079	IFI35	21.0818	GO:0060337	type I interferon signaling pathway	A series of molecular signals initiated by the binding of a type I interferon to a receptor on the surface of a cell, and ending with regulation of a downstream cellular process, e.g. transcription. Type I interferons include the interferon-alpha, beta, delta, episilon, zeta, kappa, tau, and omega gene families. [GOC:add, GOC:dph, GOC:signaling, PR:000025848]	interferon induced protein 35
ENST00000479540	HELZ2	1.23592e-33	5.8837e-31	3.04603	0.252007	4.28018	2.71068	0.102266	0.183517	0.0477519	0.183517	ENSG00000130589	HELZ2	21.0316	GO:0030374	ligand-dependent nuclear receptor transcription coactivator activity	The function of a transcription cofactor that activates transcription in conjuction with a ligand-dependent nuclear receptor from a RNA polymerase II promoter; does not bind DNA itself. [GOC:dph, GOC:tb]	helicase with zinc finger 2, transcriptional coactivator
ENST00000572021	TRIM25	9.77742e-06	0.000209774	3.04252	0.688036	3.42252	5.05467	0.885648	1.24462	0.124052	1.24462	ENSG00000121060	TRIM25	20.958	GO:1902186	regulation of viral release from host cell	Any process that modulates the frequency, rate or extent of viral release from host cell. [GOC:TermGenie, PMID:18305167]	tripartite motif containing 25	ERAD pathway
ENST00000462666	PLSCR1	7.44975e-05	0.00120981	3.03072	0.765054	2.17595	5.86445	1.37829	1.2556	0.426084	1.2556	ENSG00000188313	PLSCR1	20.7121	GO:2000373	positive regulation of DNA topoisomerase (ATP-hydrolyzing) activity	Any process that activates or increases the frequency, rate or extent of DNA topoisomerase (ATP-hydrolyzing) activity. [GOC:mah]	phospholipid scramblase 1	defense response to virus
ENST00000369230	PNLIPRP3	4.97594e-09	2.34962e-07	3.02716	0.517643	0.820434	2.58255	0.0619345	0.114423	1.14386	1.14386	ENSG00000203837	PNLIPRP3	20.6386	GO:0005515	protein binding	Interacting selectively and non-covalently with any protein or protein complex (a complex of two or more proteins that may include other nonprotein molecules). [GOC:go_curators]	pancreatic lipase-related protein 3
ENST00000535459	SOD2	2.21147e-06	5.6191e-05	3.02675	0.63949	2.82783	4.40718	1.15436	0.685902	0.237708	0.685902	ENSG00000112096	SOD2	20.6302	GO:0006801	superoxide metabolic process	The chemical reactions and pathways involving superoxide, the superoxide anion O2- (superoxide free radical), or any compound containing this species. [CHEBI:18421, GOC:jl]	uncharacterized LOC100129518	age-dependent response to reactive oxygen species
ENST00000617012	MBOAT7	7.774e-07	2.21634e-05	3.01952	0.611121	1.09415	3.14635	0.72397	-0.207284	0.956642	0.956642	ENSG00000276935	MBOAT7	20.4816	GO:0036149	phosphatidylinositol acyl-chain remodeling	Remodeling the acyl chains of phosphatidylinositol, through sequential deacylation and re-acylation reactions, to generate phosphatidylinositol containing different types of fatty acid acyl chains. [CHEBI:28874, GOC:mw, PMID:18094042, PMID:18772128]	membrane bound O-acyltransferase domain containing 7
ENST00000619855	MBOAT7	7.774e-07	2.21634e-05	3.01952	0.611121	1.09415	3.14635	0.72397	-0.207284	0.956642	0.956642	ENSG00000273592	MBOAT7	20.4816	GO:0036149	phosphatidylinositol acyl-chain remodeling	Remodeling the acyl chains of phosphatidylinositol, through sequential deacylation and re-acylation reactions, to generate phosphatidylinositol containing different types of fatty acid acyl chains. [CHEBI:28874, GOC:mw, PMID:18094042, PMID:18772128]	membrane bound O-acyltransferase domain containing 7
ENST00000251642	DHX58	1.88245e-32	8.14218e-30	3.01919	0.254543	4.95978	2.8217	0.264505	-0.0228828	0.0270604	0.0270604	ENSG00000108771	DHX58	20.4747				DEXH (Asp-Glu-X-His) box polypeptide 58	negative regulation of MDA-5 signaling pathway
ENST00000269217	LAMA3	0.000318901	0.00415323	3.01892	0.838719	2.06947	5.9158	1.7333	1.43222	0.465304	1.43222	ENSG00000053747	LAMA3	20.4692	GO:0035987	endodermal cell differentiation	The process in which a relatively unspecialized cell acquires the specialized features of an endoderm cell, a cell of the inner of the three germ layers of the embryo. [CL:0000223, GOC:yaf, PMID:17624332]	laminin subunit alpha 3	Generalized junctional epidermolysis bullosa non-Herlitz type
ENST00000441045	NAMPT	5.48851e-08	2.05766e-06	3.01708	0.55515	2.0901	3.75829	0.929372	0.289533	0.45749	0.45749	ENSG00000105835	NAMPT	20.4315	GO:0047280	nicotinamide phosphoribosyltransferase activity	Catalysis of the reaction: diphosphate + nicotinamide mononucleotide = 5-phospho-alpha-D-ribose 1-diphosphate + H(+) + nicotinamide. [EC:2.4.2.12, RHEA:16152]	nicotinamide phosphoribosyltransferase
ENST00000494568	PLSCR1	1.47486e-09	7.61505e-08	3.01238	0.498154	4.60105	4.15574	0.445845	0.670866	0.0351241	0.670866	ENSG00000188313	PLSCR1	20.3358	GO:2000373	positive regulation of DNA topoisomerase (ATP-hydrolyzing) activity	Any process that activates or increases the frequency, rate or extent of DNA topoisomerase (ATP-hydrolyzing) activity. [GOC:mah]	phospholipid scramblase 1	defense response to virus
ENST00000458521	TAC3	3.69167e-14	3.84366e-12	3.00966	0.397503	1.89305	4.34988	0.174644	0.118543	0.536394	0.536394	ENSG00000166863	TAC3	20.2805	GO:0007565	female pregnancy	The set of physiological processes that allow an embryo or foetus to develop within the body of a female animal. It covers the time from fertilization of a female ovum by a male spermatozoon until birth. [ISBN:0192800825]	tachykinin 3	Normosmic congenital hypogonadotropic hypogonadism
ENST00000557748	PGF	1.59848e-09	8.21409e-08	3.00814	0.498523	1.88299	3.40231	0.577688	0.361627	0.540673	0.540673	ENSG00000119630	PGF	20.2496	GO:0007267	cell-cell signaling	Any process that mediates the transfer of information from one cell to another. [GOC:mah]	placental growth factor	growth factor activity
ENST00000554901	SPTLC2	3.76669e-05	0.000669749	3.00804	0.729869	2.69347	6.58963	1.2353	1.16189	0.269859	1.16189	ENSG00000100596	SPTLC2	20.2477	GO:0017059	serine C-palmitoyltransferase complex	An enzyme complex that catalyzes the transfer of a palmitoyl on to serine, forming 3-dehydro-D-sphinganine. [EC:2.3.1.50]	serine palmitoyltransferase, long chain base subunit 2	Hereditary sensory and autonomic neuropathy type 1
ENST00000583376	CD7	6.06172e-11	3.98289e-09	3.00762	0.459725	1.37106	2.98442	0.15968	0.416995	0.791382	0.791382	ENSG00000173762	CD7	20.2391	GO:0005515	protein binding	Interacting selectively and non-covalently with any protein or protein complex (a complex of two or more proteins that may include other nonprotein molecules). [GOC:go_curators]	CD7 molecule
ENST00000412288	YIPF1	0.000147667	0.00217078	3.007	0.792366	1.17379	3.90323	1.91854	-0.279255	0.906763	0.906763	ENSG00000058799	YIPF1	20.2266	GO:0002230	positive regulation of defense response to virus by host	Any host process that results in the promotion of antiviral immune response mechanisms, thereby limiting viral replication. [GOC:add, GOC:dph, GOC:tb, ISBN:0781735149]	Yip1 domain family member 1	positive regulation of defense response to virus by host
ENST00000550797	RHEBL1	3.52232e-05	0.000632239	3.00666	0.726813	1.57544	4.4917	0.485393	1.89177	0.683327	1.89177	ENSG00000167550	RHEBL1	20.2197	GO:0031929	TOR signaling	A series of molecular signals mediated by TOR (Target of rapamycin) proteins, members of the phosphoinositide (PI) 3-kinase related kinase (PIKK) family that act as serine/threonine kinases in response to nutrient availability or growth factors. [PMID:12372295]	Ras homolog enriched in brain like 1	insulin receptor signaling pathway
ENST00000471113	RMND5A	8.93645e-08	3.19824e-06	2.99934	0.560927	1.79442	3.61698	0.836447	0.304949	0.579428	0.579428	ENSG00000153561	RMND5A	20.0723	GO:0005515	protein binding	Interacting selectively and non-covalently with any protein or protein complex (a complex of two or more proteins that may include other nonprotein molecules). [GOC:go_curators]	required for meiotic nuclear division 5 homolog A
ENST00000528275	UBE2L6	6.05217e-05	0.00101351	2.99685	0.747202	3.49713	4.59969	1.41448	1.09792	0.11313	1.09792	ENSG00000156587	UBE2L6	20.0224	GO:0032480	negative regulation of type I interferon production	Any process that stops, prevents, or reduces the frequency, rate, or extent of type I interferon production. Type I interferons include the interferon-alpha, beta, delta, episilon, zeta, kappa, tau, and omega gene families. [GOC:add, GOC:mah]	ubiquitin conjugating enzyme E2L 6
ENST00000559195	TNFAIP2	1.91163e-13	1.81152e-11	2.99605	0.407359	2.76445	3.26738	0.413906	0.332828	0.252448	0.332828	ENSG00000185215	TNFAIP2	20.0065				TNF alpha induced protein 2
ENST00000416156	SERHL2	0.000149527	0.00219302	2.99516	0.789893	1.22101	4.2063	1.92959	0.128704	0.878103	0.878103	ENSG00000183569	SERHL2	19.9886				serine hydrolase-like 2
ENST00000543152	C16orf62	7.24112e-06	0.000160687	2.99467	0.667488	1.46765	4.14499	0.298338	1.70659	0.73892	1.70659	ENSG00000103544	C16orf62	19.9788				chromosome 16 open reading frame 62	Golgi to plasma membrane transport
ENST00000554084	WARS	6.55985e-10	3.61601e-08	2.99373	0.484708	1.67068	3.05701	0.420545	0.351234	0.636694	0.636694	ENSG00000140105	WARS	19.96	GO:0006436	tryptophanyl-tRNA aminoacylation	The process of coupling tryptophan to tryptophanyl-tRNA, catalyzed by tryptophanyl-tRNA synthetase. In tRNA aminoacylation, the amino acid is first activated by linkage to AMP and then transferred to either the 2'- or the 3'-hydroxyl group of the 3'-adenosine residue of the tRNA. [GOC:mcc, ISBN:0716730510]	tryptophanyl-tRNA synthetase
ENST00000489332	ZMYM3	3.31617e-05	0.000599644	2.99078	0.720567	1.75817	5.30557	0.972611	1.36386	0.595829	1.36386	ENSG00000147130	ZMYM3	19.9012	GO:0022604	regulation of cell morphogenesis	Any process that modulates the frequency, rate or extent of cell morphogenesis. Cell morphogenesis is the developmental process in which the shape of a cell is generated and organized. [GOC:isa_complete]	zinc finger, MYM-type 3	regulation of microtubule cytoskeleton organization
ENST00000520867	CPEB4	2.34399e-07	7.61803e-06	2.98957	0.578281	4.22234	4.7937	0.433253	1.07159	0.050682	1.07159	ENSG00000113742	CPEB4	19.8772	GO:0036294	cellular response to decreased oxygen levels	Any process that results in a change in state or activity of a cell (in terms of movement, secretion, enzyme production, gene expression, etc.) as a result of a stimulus reflecting a decline in the level of oxygen. [GOC:al]	cytoplasmic polyadenylation element binding protein 4
ENST00000563664	AMFR	8.02783e-05	0.0012904	2.98913	0.757976	1.18923	3.83017	1.68806	-0.0286712	0.897318	0.897318	ENSG00000159461	AMFR	19.8684	GO:0000838	Hrd1p ubiquitin ligase ERAD-M complex	A multiprotein complex that recognizes and ubiquitinates proteins with misfolded membrane domains during ER-associated protein degradation (ERAD). In S. cerevisiae, this complex contains the ubiquitin ligase Hrd1p. [GOC:elh, PMID:16873066]	autocrine motility factor receptor, E3 ubiquitin protein ligase	ER-associated ubiquitin-dependent protein catabolic process
ENST00000293760	LEMD2	0.00271873	0.0242762	2.98878	0.996969	2.71681	7.8553	2.135	2.33777	0.264026	2.33777	ENSG00000161904	LEMD2	19.8615	GO:0005639	integral component of nuclear inner membrane	The component of the nuclear inner membrane consisting of the gene products and protein complexes having at least some part of their peptide sequence embedded in the hydrophobic region of the membrane. [GOC:go_curators]	LEM domain containing 2	nuclear envelope organization
ENST00000591382	EFTUD2	0.000389937	0.00493488	2.98633	0.841977	3.44468	5.88794	2.29195	0.89821	0.120702	0.89821	ENSG00000108883	EFTUD2	19.8128	GO:0015030	Cajal body	A class of nuclear body, first seen after silver staining by Ramon y Cajal in 1903, enriched in small nuclear ribonucleoproteins, and certain general RNA polymerase II transcription factors; ultrastructurally, they appear as a tangle of coiled, electron-dense threads roughly 0.5 micrometers in diameter; involved in aspects of snRNP biogenesis; the protein coilin serves as a marker for Cajal bodie…	elongation factor Tu GTP binding domain containing 2	Mandibulofacial dysostosis-microcephaly syndrome
ENST00000508159	HERC5	3.86949e-58	4.96429e-55	2.98524	0.185716	5.32607	2.73601	0.051436	0.103771	0.0229118	0.103771	ENSG00000138646	HERC5	19.7912	GO:0042296	ISG15 transferase activity	Catalysis of the transfer of ISG15 from one protein to another via the reaction X-ISG15 + Y --> Y-ISG15 + X, where both X-ISG15 and Y-ISG15 are covalent linkages. [GOC:mah, PMID:12826404]	HECT and RLD domain containing E3 ubiquitin protein ligase 5
ENST00000321725	STAB1	1.52929e-11	1.11198e-09	2.98517	0.442569	1.397	2.82957	0.104359	0.210597	0.777046	0.777046	ENSG00000010327	STAB1	19.7899	GO:0030169	low-density lipoprotein particle binding	Interacting selectively and non-covalently with a low-density lipoprotein particle, a lipoprotein particle that is rich in cholesterol esters and low in triglycerides, is typically composed of APOB100 and APOE, and has a density of 1.02-1.06 g/ml and a diameter of between 20-25 nm. [GOC:mah]	stabilin 1	negative regulation of angiogenesis
ENST00000495541	ACSL3	2.20031e-05	0.000422282	2.9838	0.703141	1.93305	3.97833	1.70522	-0.0371649	0.519608	0.519608	ENSG00000123983	ACSL3	19.7628	GO:2001247	positive regulation of phosphatidylcholine biosynthetic process	Any process that activates or increases the frequency, rate or extent of phosphatidylcholine biosynthetic process. [GOC:obol]	acyl-CoA synthetase long-chain family member 3	very long-chain fatty acid metabolic process
ENST00000615958	ENKUR	4.06969e-07	1.24464e-05	2.9831	0.588886	1.26183	3.85269	0.330508	1.23003	0.853862	1.23003	ENSG00000151023	ENKUR	19.749	GO:0017124	SH3 domain binding	Interacting selectively and non-covalently with a SH3 domain (Src homology 3) of a protein, small protein modules containing approximately 50 amino acid residues found in a great variety of intracellular or membrane-associated proteins. [GOC:go_curators, Pfam:PF00018]	enkurin, TRPC channel interacting protein
ENST00000479522	FAS	3.53104e-06	8.5228e-05	2.98234	0.64313	2.22069	3.98828	1.45084	0.358617	0.410431	0.410431	ENSG00000026103	FAS	19.734	GO:0031265	CD95 death-inducing signaling complex	A protein complex formed upon binding of Fas/CD95/APO-1 to its ligand. The complex includes FADD/Mort1, procaspase-8/10 and c-FLIP in addition to the ligand-bound receptor. [PMID:12628743, PMID:12655293]	Fas cell surface death receptor	AUTOIMMUNE LYMPHOPROLIFERATIVE SYNDROME
ENST00000520466	LY6E	3.30343e-07	1.03069e-05	2.98163	0.58403	1.98624	3.72988	0.809623	0.725288	0.497893	0.725288	ENSG00000160932	LY6E	19.7199				lymphocyte antigen 6 complex, locus E
ENST00000483824	MFSD2A	2.56264e-08	1.04794e-06	2.97938	0.534998	1.88969	3.4862	0.735121	0.55288	0.53782	0.55288	ENSG00000168389	MFSD2A	19.6756	GO:1990379	lipid transport across blood brain barrier	The directed movement of lipid molecules passing through the blood-brain barrier. [GOC:sjp, PMID:24345162]	major facilitator superfamily domain containing 2A	Autosomal recessive primary microcephaly
ENST00000572812	HMOX2	9.06708e-06	0.000196539	2.97685	0.670718	1.22172	3.30544	1.1467	-0.175763	0.877677	0.877677	ENSG00000103415	HMOX2	19.6259	GO:0006788	heme oxidation	The chemical reactions and pathways resulting in the loss of electrons from one or more atoms in heme. [GOC:mah]	heme oxygenase 2
ENST00000489186	APOL2	5.01676e-11	3.34567e-09	2.97439	0.452693	1.73141	2.90192	0.314059	0.10339	0.608131	0.608131	ENSG00000128335	APOL2	19.5777	GO:0008035	high-density lipoprotein particle binding	Interacting selectively and non-covalently with high-density lipoprotein particle, a lipoprotein particle with a high density (typically 1.063-1.21 g/ml) and a diameter of 5-10 nm that contains APOAs and may contain APOCs and APOE. [GOC:mah]	apolipoprotein L, 2
ENST00000556579	WARS	0.000595069	0.00701816	2.9681	0.864365	1.84169	6.51918	2.09236	1.26971	0.558513	1.26971	ENSG00000140105	WARS	19.4549	GO:0006436	tryptophanyl-tRNA aminoacylation	The process of coupling tryptophan to tryptophanyl-tRNA, catalyzed by tryptophanyl-tRNA synthetase. In tRNA aminoacylation, the amino acid is first activated by linkage to AMP and then transferred to either the 2'- or the 3'-hydroxyl group of the 3'-adenosine residue of the tRNA. [GOC:mcc, ISBN:0716730510]	tryptophanyl-tRNA synthetase
ENST00000269518	PMAIP1	0.000111098	0.00170264	2.95876	0.765531	2.00501	4.92608	1.26526	1.37191	0.490396	1.37191	ENSG00000141682	PMAIP1	19.2741	GO:0043331	response to dsRNA	Any process that results in a change in state or activity of a cell or an organism (in terms of movement, secretion, enzyme production, gene expression, etc.) as a result of a double-stranded RNA stimulus. [GOC:jl]	phorbol-12-myristate-13-acetate-induced protein 1	retinal cell apoptotic process
ENST00000542672	ACTN2	1.0603e-06	2.92482e-05	2.95351	0.605215	3.2279	4.18541	0.462131	1.18615	0.157013	1.18615	ENSG00000077522	ACTN2	19.1731	GO:2001137	positive regulation of endocytic recycling	Any process that activates or increases the frequency, rate or extent of endocytic recycling. [GOC:obol]	actinin, alpha 2	Familial isolated dilated cardiomyopathy
ENST00000398600	MX1	2.37867e-08	9.80659e-07	2.95223	0.528891	2.34386	3.49437	0.889058	0.349549	0.369707	0.369707	ENSG00000157601	MX1	19.1486	GO:0034340	response to type I interferon	Any process that results in a change in state or activity of a cell or an organism (in terms of movement, secretion, enzyme production, gene expression, etc.) as a result of a type I interferon stimulus. Type I interferons include the interferon-alpha, beta, delta, episilon, zeta, kappa, tau, and omega gene families. [GOC:add, ISBN:0126896631, PMID:15546383, PMID:16681834]	MX dynamin-like GTPase 1	cellular response to virus
ENST00000525825	CASP1	1.62564e-07	5.50559e-06	2.95208	0.563618	2.47716	5.78747	1.10061	-0.071973	0.328888	0.328888	ENSG00000137752	CASP1	19.1457	GO:0008234	cysteine-type peptidase activity	Catalysis of the hydrolysis of peptide bonds in a polypeptide chain by a mechanism in which the sulfhydryl group of a cysteine residue at the active center acts as a nucleophile. [GOC:mah, http://merops.sanger.ac.uk/about/glossary.htm#CATTYPE]	caspase 1
ENST00000614346	WTAP	0.00037639	0.00479148	2.9484	0.829109	2.37423	6.63634	0.96805	2.12535	0.360117	2.12535	ENSG00000146457	WTAP	19.0754	GO:0036396	MIS complex	An mRNA methyltransferase complex that catalyzes the post-transcriptional methylation of adenosine to form N6-methyladenosine (m6A). In budding yeast, the MIS complex consists of Mum2p, Ime4p and Slz1p. In vertebrates, the complex consists of METTL3, METTL14 and WTAP. [GOC:dgf, GOC:sp, PMID:22685417, PMID:24316715]	Wilms tumor 1 associated protein	mRNA methylation
ENST00000511317	DDX60	8.68446e-09	3.9386e-07	2.94838	0.512351	2.55665	3.64764	0.761343	0.419924	0.30615	0.419924	ENSG00000137628	DDX60	19.075	GO:1900246	positive regulation of RIG-I signaling pathway	Any process that activates or increases the frequency, rate or extent of RIG-I signaling pathway. [GOC:TermGenie]	DEAD (Asp-Glu-Ala-Asp) box polypeptide 60	positive regulation of MDA-5 signaling pathway
ENST00000467148	HELZ2	5.95034e-41	3.98583e-38	2.94826	0.22	5.75388	2.64069	0.025172	0.192627	0.0195341	0.192627	ENSG00000130589	HELZ2	19.0726	GO:0030374	ligand-dependent nuclear receptor transcription coactivator activity	The function of a transcription cofactor that activates transcription in conjuction with a ligand-dependent nuclear receptor from a RNA polymerase II promoter; does not bind DNA itself. [GOC:dph, GOC:tb]	helicase with zinc finger 2, transcriptional coactivator
ENST00000486181	HSPD1	5.62867e-06	0.000129185	2.9479	0.649334	1.9539	4.03227	1.29554	0.601817	0.511012	0.601817	ENSG00000144381	HSPD1	19.0658	GO:0019907	cyclin-dependent protein kinase activating kinase holoenzyme complex	A cyclin-dependent kinase activating kinase complex capable of activating cyclin-dependent kinases by threonine phosphorylation, thus regulating cell cycle progression. consists of a kinase, cyclin and optional assembly factors, in human CDK7, CCNH and MNAT1. CAK activity is itself regulated throughout the cell cycle by T-loop phosphorylation of its kinase component (CDK7 in human). Phosphorylati…	heat shock protein family D (Hsp60) member 1	Autosomal dominant spastic paraplegia type 13
ENST00000358662	SP110	0.00224159	0.0207627	2.94663	0.964146	2.76419	5.99393	1.8183	2.3648	0.252509	2.3648	ENSG00000135899	SP110	19.0416	GO:0016032	viral process	A multi-organism process in which a virus is a participant. The other participant is the host. Includes infection of a host cell, replication of the viral genome, and assembly of progeny virus particles. In some cases the viral genetic material may integrate into the host genome and only subsequently, under particular circumstances, 'complete' its life cycle. [GOC:bf, GOC:jl, GOC:mah]	SP110 nuclear body protein	Hepatic veno-occlusive disease - immunodeficiency
ENST00000395123	SLC43A3	0.000484682	0.00593545	2.946	0.844349	3.07688	4.75005	3.02216	-0.24254	0.18601	0.18601	ENSG00000134802	SLC43A3	19.0298	GO:0008150	biological_process	Any process specifically pertinent to the functioning of integrated living units: cells, tissues, organs, and organisms. A process is a collection of molecular events with a defined beginning and end. [GOC:go_curators, GOC:isa_complete]	solute carrier family 43 member 3
ENST00000347275	ZNF644	9.22758e-08	3.29309e-06	2.93814	0.550079	2.35426	5.39639	0.995234	-0.0166842	0.366404	0.366404	ENSG00000122482	ZNF644	18.8807	GO:0006355	regulation of transcription, DNA-templated	Any process that modulates the frequency, rate or extent of cellular DNA-templated transcription. [GOC:go_curators, GOC:txnOH]	zinc finger protein 644	MYOPIA 21 AUTOSOMAL DOMINANT
ENST00000591562	AOC3	1.39899e-09	7.26294e-08	2.93696	0.484999	1.53531	3.04518	0.354841	0.390711	0.703668	0.703668	ENSG00000131471	AOC3	18.8584	GO:0052596	phenethylamine:oxygen oxidoreductase (deaminating) activity	Catalysis of the reaction: phenylethylamine + O2 + H2O = phenylacetaldehyde + NH3 + hydrogen peroxide + H+. [MetaCyc:AMINEPHEN-RXN]	amine oxidase, copper containing 3
ENST00000215781	OSM	3.04784e-11	2.1011e-09	2.93666	0.441987	1.4958	2.82452	0.154978	0.457101	0.724107	0.724107	ENSG00000099985	OSM	18.8529	GO:0046888	negative regulation of hormone secretion	Any process that stops, prevents, or reduces the frequency, rate or extent of the regulated release of a hormone from a cell. [GOC:ai]	oncostatin M
ENST00000438323	IFI35	1.82807e-69	3.84367e-66	2.93356	0.16652	6.75754	2.74943	0.0877654	0.0370145	0.0143427	0.0370145	ENSG00000068079	IFI35	18.7944	GO:0060337	type I interferon signaling pathway	A series of molecular signals initiated by the binding of a type I interferon to a receptor on the surface of a cell, and ending with regulation of a downstream cellular process, e.g. transcription. Type I interferons include the interferon-alpha, beta, delta, episilon, zeta, kappa, tau, and omega gene families. [GOC:add, GOC:dph, GOC:signaling, PR:000025848]	interferon induced protein 35
ENST00000545030	EGR4	8.94768e-14	8.85329e-12	2.93279	0.393369	1.86393	3.03818	0.105217	0.59111	0.548855	0.59111	ENSG00000135625	EGR4	18.78	GO:0046872	metal ion binding	Interacting selectively and non-covalently with any metal ion. [GOC:ai]	early growth response 4
ENST00000559390	TRIM69	8.25313e-08	2.99045e-06	2.93227	0.546911	2.82714	4.26943	0.593878	0.752124	0.237864	0.752124	ENSG00000185880	TRIM69	18.7701	GO:0016607	nuclear speck	A discrete extra-nucleolar subnuclear domain, 20-50 in number, in which splicing factors are seen to be localized by immunofluorescence microscopy. [http://www.cellnucleus.com/]	tripartite motif containing 69
ENST00000301645	CYP7A1	1.23318e-12	1.0488e-10	2.93023	0.412615	1.65076	2.74706	0.11987	0.362191	0.646259	0.646259	ENSG00000167910	CYP7A1	18.7319	GO:0008123	cholesterol 7-alpha-monooxygenase activity	Catalysis of the reaction: cholesterol + NADPH + H+ + O2 = 7-alpha-hydroxycholesterol + NADP+ + H2O. [EC:1.14.13.17]	cytochrome P450 family 7 subfamily A member 1	Hypercholesterolemia due to cholesterol 7alpha-hydroxylase deficiency
ENST00000486483	TIPARP	8.14882e-05	0.00130707	2.92969	0.74358	2.92131	4.46913	1.67818	0.809923	0.217339	0.809923	ENSG00000163659	TIPARP	18.7218	GO:0071407	cellular response to organic cyclic compound	Any process that results in a change in state or activity of a cell (in terms of movement, secretion, enzyme production, gene expression, etc.) as a result of an organic cyclic compound stimulus. [GOC:mah]	TCDD-inducible poly(ADP-ribose) polymerase	negative regulation of gene expression
ENST00000320650	IL15	6.24231e-07	1.81422e-05	2.92949	0.58783	2.92072	3.64906	0.537206	1.01774	0.217462	1.01774	ENSG00000164136	IL15	18.7181	GO:0042506	tyrosine phosphorylation of Stat5 protein	The process of introducing a phosphate group to a tyrosine residue of a Stat5 protein. [GOC:jl, PMID:11426647]	interleukin 15
ENST00000511669	CXCL3	6.95669e-10	3.81574e-08	2.92708	0.474631	1.16338	2.61915	0.100565	0.296323	0.913172	0.913172	ENSG00000163734	CXCL3	18.6731	GO:0045236	CXCR chemokine receptor binding	Interacting selectively and non-covalently with a chemokine receptor in the CXCR family. [GOC:ceb, PMID:11910892]	chemokine (C-X-C motif) ligand 3
ENST00000527262	PARP10	5.72009e-11	3.77481e-09	2.92573	0.446616	5.19297	3.01606	0.873448	-0.352803	0.0241502	0.0241502	ENSG00000178685	PARP10	18.6478	GO:0005794	Golgi apparatus	A compound membranous cytoplasmic organelle of eukaryotic cells, consisting of flattened, ribosome-free vesicles arranged in a more or less regular stack. The Golgi apparatus differs from the endoplasmic reticulum in often having slightly thicker membranes, appearing in sections as a characteristic shallow semicircle so that the convex side (cis or entry face) abuts the endoplasmic reticulum, sec…	poly(ADP-ribose) polymerase family member 10	K63-linked polyubiquitin binding
ENST00000610963	IFNL4	5.46333e-08	2.05127e-06	2.92102	0.537393	0.767361	2.37199	0.116388	-0.00297715	1.18317	1.18317	ENSG00000272395	IFNL4	18.5602				interferon, lambda 4 (gene/pseudogene)	Response to antiviral treatment in hepatitis C
ENST00000409988	SPATS2L	2.77245e-05	0.000514728	2.91891	0.696407	2.43629	4.3942	1.84137	0.110685	0.341049	0.341049	ENSG00000196141	SPATS2L	18.5212	GO:0043234	protein complex	A stable macromolecular complex composed (only) of two or more polypeptide subunits along with any covalently attached molecules (such as lipid anchors or oligosaccharide) or non-protein prosthetic groups (such as nucleotides or metal ions). Prosthetic group in this context refers to a tightly bound cofactor. The component polypeptide subunits may be identical. [GOC:go_curators, http://www.ebi.ac…	spermatogenesis associated, serine rich 2 like
ENST00000383661	DTX3L	2.2869e-09	1.14523e-07	2.91886	0.488431	1.87075	3.10939	0.527624	0.416507	0.545918	0.545918	ENSG00000163840	DTX3L	18.5202	GO:0010390	histone monoubiquitination	The modification of histones by addition of a single ubiquitin group. [PMID:17329563]	deltex 3 like, E3 ubiquitin ligase	cellular response to DNA damage stimulus
ENST00000339364	PIK3AP1	1.99709e-36	1.07976e-33	2.91612	0.231357	4.92844	2.4753	0.0251665	0.215701	0.0275568	0.215701	ENSG00000155629	PIK3AP1	18.4694	GO:0034154	toll-like receptor 7 signaling pathway	Any series of molecular signals generated as a consequence of binding to toll-like receptor 7. [GOC:add, PMID:16551253, PMID:17328678]	phosphoinositide-3-kinase adaptor protein 1
ENST00000557901	B2M	0.000751623	0.00852324	2.91596	0.865265	2.03815	5.45579	1.1673	2.20177	0.477368	2.20177	ENSG00000166710	B2M	18.4666	GO:0005515	protein binding	Interacting selectively and non-covalently with any protein or protein complex (a complex of two or more proteins that may include other nonprotein molecules). [GOC:go_curators]	beta-2-microglobulin	Immunodeficiency by defective expression of HLA class 1
ENST00000427522	HELZ2	8.201e-98	5.64326e-94	2.91508	0.138884	6.72545	2.42625	0.00511451	0.0816844	0.0144347	0.0816844	ENSG00000130589	HELZ2	18.4503	GO:0030374	ligand-dependent nuclear receptor transcription coactivator activity	The function of a transcription cofactor that activates transcription in conjuction with a ligand-dependent nuclear receptor from a RNA polymerase II promoter; does not bind DNA itself. [GOC:dph, GOC:tb]	helicase with zinc finger 2, transcriptional coactivator
ENST00000539962	TMOD2	3.12708e-06	7.6651e-05	2.91179	0.624541	2.7197	4.49091	1.41393	0.341304	0.263313	0.341304	ENSG00000128872	TMOD2	18.3898	GO:0005865	striated muscle thin filament	Filaments formed of actin and associated proteins; attached to Z discs at either end of sarcomeres in myofibrils. [ISBN:0815316194]	tropomodulin 2
ENST00000437805	SAMD9L	5.14096e-05	0.000879201	2.91027	0.71874	5.92379	4.29497	0.549298	1.77535	0.0181306	1.77535	ENSG00000177409	SAMD9L	18.3617	GO:0005515	protein binding	Interacting selectively and non-covalently with any protein or protein complex (a complex of two or more proteins that may include other nonprotein molecules). [GOC:go_curators]	sterile alpha motif domain containing 9-like
ENST00000573518	XAF1	1.1364e-12	9.7085e-11	2.90812	0.408852	2.15923	2.97928	0.199188	0.553031	0.432061	0.553031	ENSG00000132530	XAF1	18.3223	GO:0005515	protein binding	Interacting selectively and non-covalently with any protein or protein complex (a complex of two or more proteins that may include other nonprotein molecules). [GOC:go_curators]	XIAP associated factor 1
ENST00000398449	ABCG1	6.68645e-05	0.00110458	2.89701	0.726581	2.06577	4.71218	1.49968	0.875963	0.466716	0.875963	ENSG00000160179	ABCG1	18.1198	GO:0042987	amyloid precursor protein catabolic process	The chemical reactions and pathways resulting in the breakdown of amyloid precursor protein (APP), the precursor of beta-amyloid, a glycoprotein associated with Alzheimer's disease. [GOC:go_curators]	ATP binding cassette subfamily G member 1	intracellular cholesterol transport
ENST00000593731	AC007192.4	5.33423e-05	0.000907538	2.89672	0.716926	2.7725	5.1282	1.4434	0.869526	0.250534	0.869526	ENSG00000268173	AC007192.4	18.1147	GO:0005515	protein binding	Interacting selectively and non-covalently with any protein or protein complex (a complex of two or more proteins that may include other nonprotein molecules). [GOC:go_curators]		MEGALENCEPHALY-POLYMICROGYRIA-POLYDACTYLY-HYDROCEPHALUS SYNDROME 1
ENST00000439784	MYH16	6.1263e-33	2.72775e-30	2.89627	0.242267	3.31603	2.48622	0.122777	0.139889	0.141344	0.141344	ENSG00000002079	MYH16	18.1064
ENST00000546970	ZNF385A	1.95239e-05	0.000382501	2.89585	0.678142	3.26097	4.29553	0.636451	1.43299	0.151003	1.43299	ENSG00000161642	ZNF385A	18.0988	GO:2000765	regulation of cytoplasmic translation	Any process that modulates the frequency, rate or extent of cytoplasmic translation. [GOC:obol]	zinc finger protein 385A	negative regulation of intrinsic apoptotic signaling pathway in response to DNA damage by p53 class mediator
ENST00000400379	ICOSLG	2.05743e-14	2.24076e-12	2.89565	0.378665	2.82317	2.79283	0.256527	0.388716	0.238766	0.388716	ENSG00000160223	ICOSLG	18.0952	GO:0042104	positive regulation of activated T cell proliferation	Any process that activates or increases the rate or extent of activated T cell proliferation. [GOC:jl]	ICOS ligand
ENST00000514027	SDHA	3.03669e-06	7.47015e-05	2.88891	0.618833	2.07782	3.73264	0.415937	1.30736	0.462128	1.30736	ENSG00000073578	SDHA	17.9737	GO:0006105	succinate metabolic process	The chemical reactions and pathways involving succinate, also known as butanedioate or ethane dicarboxylate, the dianion of succinic acid. Succinate is an important intermediate in metabolism and a component of the TCA cycle. [ISBN:0198506732]	succinate dehydrogenase complex subunit A, flavoprotein (Fp)	Familial isolated dilated cardiomyopathy
ENST00000537056	NLRC5	0.000177061	0.00253495	2.88788	0.770168	4.22061	4.60755	0.922021	1.74719	0.0507727	1.74719	ENSG00000140853	NLRC5	17.9553	GO:0043549	regulation of kinase activity	Any process that modulates the frequency, rate or extent of kinase activity, the catalysis of the transfer of a phosphate group, usually from ATP, to a substrate molecule. [GOC:bf]	NLR family, CARD domain containing 5	negative regulation of innate immune response
ENST00000442385	ANO7P1	7.70432e-10	4.19844e-08	2.87885	0.468037	1.36774	2.60366	0.192532	0.203662	0.793232	0.793232	ENSG00000237276	ANO7P1	17.7938
ENST00000555931	PSMA3	3.35637e-09	1.63169e-07	2.87595	0.486366	1.39517	2.68845	0.286435	-0.0415034	0.778049	0.778049	ENSG00000100567	PSMA3	17.7423	GO:0051436	negative regulation of ubiquitin-protein ligase activity involved in mitotic cell cycle	Any process that stops, prevents, or reduces the frequency, rate or extent of ubiquitin ligase activity that contributes to the mitotic cell cycle. [GOC:ai, GOC:tb]	proteasome subunit alpha 3
ENST00000474902	MAN1B1	0.000297008	0.00391322	2.87422	0.794446	2.33765	6.4564	1.97689	0.863252	0.371692	0.863252	ENSG00000177239	MAN1B1	17.7116	GO:1904380	endoplasmic reticulum mannose trimming	Any protein alpha-1,2-demannosylation that takes place in the endoplasmic reticulum quality control compartment (ERQC). [GO_REF:0000062, GOC:bf, GOC:PARL, GOC:TermGenie, PMID:24519966]	mannosidase, alpha, class 1B, member 1	Autosomal recessive non-syndromic intellectual disability
ENST00000518185	GFPT2	2.24762e-07	7.34897e-06	2.87308	0.554905	1.91834	3.46071	0.203565	1.18207	0.525733	1.18207	ENSG00000131459	GFPT2	17.6913	GO:1901137	carbohydrate derivative biosynthetic process	The chemical reactions and pathways resulting in the formation of carbohydrate derivative. [GOC:TermGenie]	glutamine-fructose-6-phosphate transaminase 2
ENST00000590596	PMAIP1	7.01285e-15	8.129e-13	2.86865	0.36852	2.65521	2.72078	0.331488	-0.0562812	0.279644	0.279644	ENSG00000141682	PMAIP1	17.6133	GO:0043331	response to dsRNA	Any process that results in a change in state or activity of a cell or an organism (in terms of movement, secretion, enzyme production, gene expression, etc.) as a result of a double-stranded RNA stimulus. [GOC:jl]	phorbol-12-myristate-13-acetate-induced protein 1	retinal cell apoptotic process
ENST00000489304	CD40	7.37636e-07	2.11412e-05	2.86799	0.579253	1.40281	4.14473	0.644311	0.865592	0.773856	0.865592	ENSG00000101017	CD40	17.6016	GO:2000353	positive regulation of endothelial cell apoptotic process	Any process that activates or increases the frequency, rate or extent of endothelial cell apoptotic process. [GOC:BHF, GOC:mah, GOC:mtg_apoptosis]	CD40 molecule, TNF receptor superfamily member 5	Hyper-IgM syndrome type 3
ENST00000478267	PLSCR1	9.32272e-09	4.19789e-07	2.86776	0.499383	2.48951	3.5755	0.418	0.704223	0.325275	0.704223	ENSG00000188313	PLSCR1	17.5976	GO:2000373	positive regulation of DNA topoisomerase (ATP-hydrolyzing) activity	Any process that activates or increases the frequency, rate or extent of DNA topoisomerase (ATP-hydrolyzing) activity. [GOC:mah]	phospholipid scramblase 1	defense response to virus
ENST00000514748	DDX60L	2.63619e-14	2.81837e-12	2.86298	0.375965	3.45913	2.73466	0.229314	0.406758	0.118564	0.406758	ENSG00000181381	DDX60L	17.5137	GO:0004386	helicase activity	Catalysis of the reaction: NTP + H2O = NDP + phosphate, to drive the unwinding of a DNA or RNA helix. [GOC:mah, ISBN:0198506732]	DEAD (Asp-Glu-Ala-Asp) box polypeptide 60-like
ENST00000554065	PNP	4.18537e-09	1.99624e-07	2.86281	0.487146	1.70493	3.16893	0.227324	0.840578	0.620477	0.840578	ENSG00000198805	PNP	17.5107	GO:0009116	nucleoside metabolic process	The chemical reactions and pathways involving a nucleoside, a nucleobase linked to either beta-D-ribofuranose (a ribonucleoside) or 2-deoxy-beta-D-ribofuranose, (a deoxyribonucleoside), e.g. adenosine, guanosine, inosine, cytidine, uridine and deoxyadenosine, deoxyguanosine, deoxycytidine and thymidine (= deoxythymidine). [GOC:ma]	purine nucleoside phosphorylase	PURINE NUCLEOSIDE PHOSPHORYLASE DEFICIENCY
ENST00000539409	FAM60A	0.0040063	0.0329833	2.86064	0.994085	2.59362	6.1169	2.37643	2.0705	0.295989	2.0705	ENSG00000139146	FAM60A	17.4728	GO:0016580	Sin3 complex	A multiprotein complex that functions broadly in eukaryotic organisms as a transcriptional repressor of protein-coding genes, through the gene-specific deacetylation of histones. Amongst its subunits, the Sin3 complex contains Sin3-like proteins, and a number of core proteins that are shared with the NuRD complex (including histone deacetylases and histone binding proteins). The Sin3 complex does…	family with sequence similarity 60 member A	negative regulation of cell migration
ENST00000473341	PARP12	2.63782e-30	1.00334e-27	2.86048	0.250041	5.56406	2.41988	0.0698708	0.211472	0.0210282	0.211472	ENSG00000059378	PARP12	17.4699	GO:0044822	poly(A) RNA binding	Interacting non-covalently with a poly(A) RNA, a RNA molecule which has a tail of adenine bases. [GOC:jl]	poly(ADP-ribose) polymerase family member 12
ENST00000413196	DHX58	2.73992e-13	2.51691e-11	2.85111	0.39021	3.51676	2.88674	0.376214	0.308974	0.110429	0.308974	ENSG00000108771	DHX58	17.307				DEXH (Asp-Glu-X-His) box polypeptide 58	negative regulation of MDA-5 signaling pathway
ENST00000495175	TRIT1	3.41382e-05	0.000615097	2.84677	0.686971	1.48775	3.3615	1.39536	-0.155834	0.728322	0.728322	ENSG00000043514	TRIT1	17.232	GO:0052381	tRNA dimethylallyltransferase activity	Catalysis of the reaction: dimethylallyl diphosphate + tRNA = diphosphate + tRNA containing 6-dimethylallyladenosine. [EC:2.5.1.75]	tRNA isopentenyltransferase 1
ENST00000522226	TNIP1	0.00360563	0.0303887	2.84475	0.977326	2.84298	7.50375	2.88047	1.41778	0.234297	1.41778	ENSG00000145901	TNIP1	17.1973	GO:0085032	modulation by symbiont of host I-kappaB kinase/NF-kappaB cascade	Any process in which an organism modulates the frequency, rate or extent of host NF-kappaB-mediated signal transduction pathways during the host defense response. The host is defined as the larger of the organisms involved in a symbiotic interaction. [GOC:pamgo_curators]	TNFAIP3 interacting protein 1	leukocyte cell-cell adhesion
ENST00000361842	XAF1	1.84981e-14	2.03219e-12	2.84336	0.371163	6.81726	2.70096	0.00409981	0.615831	0.0141754	0.615831	ENSG00000132530	XAF1	17.1733	GO:0005515	protein binding	Interacting selectively and non-covalently with any protein or protein complex (a complex of two or more proteins that may include other nonprotein molecules). [GOC:go_curators]	XIAP associated factor 1
ENST00000267082	ITGB7	6.71411e-06	0.000150432	2.837	0.630086	1.3479	2.94477	0.982188	-0.115505	0.804348	0.804348	ENSG00000139626	ITGB7	17.0644	GO:0034669	integrin alpha4-beta7 complex	An integrin complex that comprises one alpha4 subunit and one beta7 subunit. [PMID:12297042]	integrin beta 7	cell adhesion molecule binding
ENST00000540176	STAT1	0.000110027	0.00169065	2.83451	0.732934	3.52389	4.70516	0.951079	1.46629	0.109465	1.46629	ENSG00000115415	STAT1	17.022	GO:0003700	transcription factor activity, sequence-specific DNA binding	Interacting selectively and non-covalently with a specific DNA sequence in order to modulate transcription. The transcription factor may or may not also interact selectively with a protein or macromolecular complex. [GOC:curators, GOC:txnOH]	signal transducer and activator of transcription 1	Autoimmune enteropathy and endocrinopathy-susceptibility to chronic infections syndrome
ENST00000596238	C3	5.01246e-08	1.89894e-06	2.83429	0.519971	1.5037	2.70559	0.496676	-0.00609954	0.719987	0.719987	ENSG00000125730	C3	17.0183	GO:2000427	positive regulation of apoptotic cell clearance	Any process that activates or increases the frequency, rate or extent of apoptotic cell clearance. [GOC:obol]	complement component 3	Atypical hemolytic uremic syndrome with C3 anomaly
ENST00000519910	TNFRSF10B	1.27699e-09	6.67073e-08	2.83397	0.466861	1.55147	2.99595	0.23744	0.743375	0.695426	0.743375	ENSG00000120889	TNFRSF10B	17.0128	GO:0070059	intrinsic apoptotic signaling pathway in response to endoplasmic reticulum stress	A series of molecular signals in which an intracellular signal is conveyed to trigger the apoptotic death of a cell. The pathway is induced in response to a stimulus indicating endoplasmic reticulum (ER) stress, and ends when the execution phase of apoptosis is triggered. ER stress usually results from the accumulation of unfolded or misfolded proteins in the ER lumen. [GOC:mah, GOC:mtg_apoptosis…	tumor necrosis factor receptor superfamily member 10b	EPILEPSY PROGRESSIVE MYOCLONIC 3 WITH OR WITHOUT INTRACELLULAR INCLUSIONS
ENST00000525972	EIF4G2	1.07436e-08	4.77237e-07	2.8302	0.494915	2.15757	3.19953	0.669574	0.254434	0.432659	0.432659	ENSG00000110321	EIF4G2	16.9488	GO:0005488	binding	The selective, non-covalent, often stoichiometric, interaction of a molecule with one or more specific sites on another molecule. [GOC:ceb, GOC:mah, ISBN:0198506732]	eukaryotic translation initiation factor 4 gamma, 2
ENST00000441486	DYRK3	1.5564e-05	0.000315502	2.8278	0.654499	1.80742	3.91245	1.32122	0.606439	0.573624	0.606439	ENSG00000143479	DYRK3	16.9082	GO:0030218	erythrocyte differentiation	The process in which a myeloid precursor cell acquires specializes features of an erythrocyte. [GOC:mah]	dual specificity tyrosine-(Y)-phosphorylation regulated kinase 3
ENST00000265113	SLC1A3	0.00233376	0.0214259	2.82566	0.92824	5.66259	13.4066	1.02508	2.85225	0.0202689	2.85225	ENSG00000079215	SLC1A3	16.872	GO:0070779	D-aspartate import	The directed movement of D-aspartate, the L-enantiomer of the anion of 2-aminopentanedioic acid, into a cell or organelle. [GOC:rph]	solute carrier family 1 (glial high affinity glutamate transporter), member 3	ALTERNATING HEMIPLEGIA OF CHILDHOOD
ENST00000465778	HLA-F	4.36821e-08	1.67754e-06	2.82537	0.516024	2.48494	7.48672	0.821799	0.376464	0.326609	0.376464	ENSG00000234487	HLA-F	16.8673	GO:0005515	protein binding	Interacting selectively and non-covalently with any protein or protein complex (a complex of two or more proteins that may include other nonprotein molecules). [GOC:go_curators]	major histocompatibility complex, class I, F
ENST00000269389	SECTM1	1.97452e-42	1.3968e-39	2.82291	0.206782	4.56758	2.49911	0.0714884	0.120926	0.0361811	0.120926	ENSG00000141574	SECTM1	16.8257	GO:0007498	mesoderm development	The process whose specific outcome is the progression of the mesoderm over time, from its formation to the mature structure. The mesoderm is the middle germ layer that develops into muscle, bone, cartilage, blood and connective tissue. [GOC:dph, GOC:tb]	secreted and transmembrane 1	positive regulation of I-kappaB kinase/NF-kappaB signaling
ENST00000379883	DDX58	2.23768e-28	7.73408e-26	2.82232	0.255456	8.32008	2.37421	0.00105049	0.29261	0.0121665	0.29261	ENSG00000107201	DDX58	16.8158	GO:0016817	hydrolase activity, acting on acid anhydrides	Catalysis of the hydrolysis of any acid anhydride. [GOC:jl]	DEAD (Asp-Glu-Ala-Asp) box polypeptide 58	Singleton-Merten dysplasia
ENST00000360310	BAZ1A	0.0011955	0.0125577	2.82051	0.870541	4.96686	6.63078	1.59084	1.81945	0.0269525	1.81945	ENSG00000198604	BAZ1A	16.7854	GO:0016590	ACF complex	An ISWI complex that contains an ATPase subunit of the ISWI family (SNF2H in mammals, Isw2 in S. cerevisiae), an ACF1 homolog, and generally no other subunits, though Xenopus is an exception with a third non-conserved subunit. ACF plays roles in regulation of RNA polymerase II transcription and in DNA replication and repair. [GOC:bf, GOC:krc, PMID:12192034, PMID:15284901, PMID:16568949, PMID:2181…	bromodomain adjacent to zinc finger domain 1A
ENST00000442415	RAF1	0.000247552	0.00336513	2.8127	0.767496	1.59045	4.5013	1.5672	1.08352	0.675827	1.08352	ENSG00000132155	RAF1	16.6549	GO:0007190	activation of adenylate cyclase activity	Any process that initiates the activity of the inactive enzyme adenylate cyclase. [GOC:ai]	Raf-1 proto-oncogene, serine/threonine kinase	Familial isolated dilated cardiomyopathy
ENST00000560869	TNFAIP2	9.25324e-10	4.97801e-08	2.80899	0.458851	4.57918	3.61138	0.395296	0.552153	0.0358084	0.552153	ENSG00000185215	TNFAIP2	16.5931				TNF alpha induced protein 2
ENST00000470316	NUB1	4.65489e-06	0.000108681	2.80362	0.612175	3.11478	3.7231	0.340826	1.34559	0.178543	1.34559	ENSG00000013374	NUB1	16.5043	GO:0005515	protein binding	Interacting selectively and non-covalently with any protein or protein complex (a complex of two or more proteins that may include other nonprotein molecules). [GOC:go_curators]	negative regulator of ubiquitin-like proteins 1
ENST00000586615	FOSB	0.000382247	0.00484972	2.80051	0.788422	2.39741	4.54605	1.61448	1.18276	0.352909	1.18276	ENSG00000125740	FOSB	16.4531	GO:0000982	transcription factor activity, RNA polymerase II core promoter proximal region sequence-specific binding	Interacting selectively and non-covalently with a sequence of DNA that is in cis with and relatively close to a core promoter for RNA polymerase II (RNAP II) in order to modulate transcription by RNAP II. [GOC:txnOH]	FBJ murine osteosarcoma viral oncogene homolog B
ENST00000572992	RMI2	8.58817e-15	9.86441e-13	2.79909	0.360774	2.53075	2.91952	0.272283	0.136317	0.313426	0.313426	ENSG00000175643	RMI2	16.4297	GO:0045003	double-strand break repair via synthesis-dependent strand annealing	SDSA is a major mechanism of double-strand break repair in mitosis which allows for the error-free repair of a double-strand break without the exchange of adjacent sequences. The broken DNA searches for and base pairs with a homologous region in an intact chromosome. DNA synthesis initiates from the 3' end of the invading DNA strand, using the intact chromosome as the template. Newly synthesized …	RecQ mediated genome instability 2
ENST00000585785	FAM210A	0.000114829	0.00175131	2.79673	0.725121	2.36422	4.1584	1.22294	1.14316	0.363259	1.14316	ENSG00000177150	FAM210A	16.3909	GO:0005739	mitochondrion	A semiautonomous, self replicating organelle that occurs in varying numbers, shapes, and sizes in the cytoplasm of virtually all eukaryotic cells. It is notably the site of tissue respiration. [GOC:giardia, ISBN:0198506732]	family with sequence similarity 210 member A
ENST00000508066	ARAP2	6.51154e-05	0.00107898	2.78784	0.698101	1.62933	4.05375	0.797908	1.39514	0.656661	1.39514	ENSG00000047365	ARAP2	16.2459	GO:0005547	phosphatidylinositol-3,4,5-trisphosphate binding	Interacting selectively and non-covalently with phosphatidylinositol-3,4,5-trisphosphate, a derivative of phosphatidylinositol in which the inositol ring is phosphorylated at the 3', 4' and 5' positions. [GOC:bf, GOC:jl]	ArfGAP with RhoGAP domain, ankyrin repeat and PH domain 2
ENST00000513901	DDX60L	1.39715e-09	7.25838e-08	2.78095	0.45922	2.26391	3.14165	0.553202	0.323976	0.39577	0.39577	ENSG00000181381	DDX60L	16.1343	GO:0004386	helicase activity	Catalysis of the reaction: NTP + H2O = NDP + phosphate, to drive the unwinding of a DNA or RNA helix. [GOC:mah, ISBN:0198506732]	DEAD (Asp-Glu-Ala-Asp) box polypeptide 60-like
ENST00000260184	DDX60L	3.84025e-24	1.01282e-21	2.77884	0.274167	7.7104	2.42942	0.0500934	0.28816	0.0123789	0.28816	ENSG00000181381	DDX60L	16.1004	GO:0004386	helicase activity	Catalysis of the reaction: NTP + H2O = NDP + phosphate, to drive the unwinding of a DNA or RNA helix. [GOC:mah, ISBN:0198506732]	DEAD (Asp-Glu-Ala-Asp) box polypeptide 60-like
ENST00000628825	ZNF33A	0.000599488	0.00705669	2.77883	0.809719	1.16386	3.82316	2.03753	-0.0296734	0.912873	0.912873	ENSG00000189180	ZNF33A	16.1002	GO:0005622	intracellular	The living contents of a cell; the matter contained within (but not including) the plasma membrane, usually taken to exclude large vacuoles and masses of secretory or ingested material. In eukaryotes it includes the nucleus and cytoplasm. [ISBN:0198506732]	zinc finger protein 33A
ENST00000488726	PARP12	2.45551e-22	5.90047e-20	2.77454	0.28542	6.02673	2.36762	0.0167089	0.349881	0.0174132	0.349881	ENSG00000059378	PARP12	16.0313	GO:0044822	poly(A) RNA binding	Interacting non-covalently with a poly(A) RNA, a RNA molecule which has a tail of adenine bases. [GOC:jl]	poly(ADP-ribose) polymerase family member 12
ENST00000433935	ZMYND15	1.24245e-08	5.42982e-07	2.77213	0.486869	1.94921	5.54775	0.55375	-0.211785	0.512937	0.512937	ENSG00000141497	ZMYND15	15.9927	GO:0006351	transcription, DNA-templated	The cellular synthesis of RNA on a template of DNA. [GOC:jl, GOC:txnOH]	zinc finger, MYND-type containing 15	Male infertility with azoospermia or oligozoospermia due to single gene mutation
ENST00000542502	MDM2	0.00026552	0.0035679	2.77091	0.759819	1.10589	3.53572	1.6488	-0.470193	0.949167	0.949167	ENSG00000135679	MDM2	15.9732	GO:1901797	negative regulation of signal transduction by p53 class mediator	Any process that stops, prevents or reduces the frequency, rate or extent of signal transduction by p53 class mediator. [GOC:TermGenie]	MDM2 proto-oncogene, E3 ubiquitin protein ligase	Dedifferentiated liposarcoma
ENST00000420415	TFRC	0.00512174	0.0401198	2.77022	0.989622	3.72337	6.10957	2.50644	1.90064	0.0864084	1.90064	ENSG00000072274	TFRC	15.9622	GO:0033572	transferrin transport	The directed movement of transferrin into, out of or within a cell, or between cells, by means of some agent such as a transporter or pore. [GOC:mlg]	transferrin receptor
ENST00000600514	MVB12A	3.29133e-05	0.000595587	2.76991	0.667076	3.35153	5.37181	0.820015	1.18244	0.135367	1.18244	ENSG00000141971	MVB12A	15.9572	GO:0005654	nucleoplasm	That part of the nuclear content other than the chromosomes or the nucleolus. [GOC:ma, ISBN:0124325653]	multivesicular body subunit 12A	calcium-dependent phospholipid binding
ENST00000489775	PLSCR1	9.3268e-13	8.0775e-11	2.75924	0.386443	2.12872	4.14035	0.228883	0.314722	0.443138	0.443138	ENSG00000188313	PLSCR1	15.7878	GO:2000373	positive regulation of DNA topoisomerase (ATP-hydrolyzing) activity	Any process that activates or increases the frequency, rate or extent of DNA topoisomerase (ATP-hydrolyzing) activity. [GOC:mah]	phospholipid scramblase 1	defense response to virus
ENST00000569965	PML	1.01823e-05	0.000217106	2.75924	0.625215	2.24574	3.84948	1.09115	0.667871	0.401879	0.667871	ENSG00000140464	PML	15.7878	GO:2000779	regulation of double-strand break repair	Any process that modulates the frequency, rate or extent of double-strand break repair. [GOC:BHF]	promyelocytic leukemia	ACUTE PROMYELOCYTIC LEUKEMIA
ENST00000340369	XIRP1	2.9569e-08	1.18171e-06	2.75605	0.497126	3.2923	3.73781	0.802447	0.309657	0.145451	0.309657	ENSG00000168334	XIRP1	15.7376	GO:0044822	poly(A) RNA binding	Interacting non-covalently with a poly(A) RNA, a RNA molecule which has a tail of adenine bases. [GOC:jl]	xin actin binding repeat containing 1
ENST00000435742	KAT7	4.29744e-05	0.000750718	2.75195	0.672704	2.6882	4.92798	1.01275	1.02364	0.27119	1.02364	ENSG00000136504	KAT7	15.6732	GO:1900182	positive regulation of protein localization to nucleus	Any process that activates or increases the frequency, rate or extent of protein localization to nucleus. [GOC:TermGenie]	K(lysine) acetyltransferase 7
ENST00000477774	OSTM1	9.38651e-06	0.00020242	2.75106	0.620889	1.96173	3.97337	0.909602	0.825162	0.507812	0.825162	ENSG00000081087	OSTM1	15.6593	GO:0005765	lysosomal membrane	The lipid bilayer surrounding the lysosome and separating its contents from the cell cytoplasm. [GOC:ai]	osteopetrosis associated transmembrane protein 1	Infantile osteopetrosis with neuroaxonal dysplasia
ENST00000559994	WDR73	0.00112761	0.0119641	2.74768	0.843732	1.95769	4.89096	2.46315	0.740327	0.509462	0.740327	ENSG00000177082	WDR73	15.6064	GO:0032154	cleavage furrow	In animal cells, the first sign of cleavage, or cytokinesis, is the appearance of a shallow groove in the cell surface near the old metaphase plate. A contractile ring containing actin and myosin is located just inside the plasma membrane at the location of the furrow. Ring contraction is associated with centripetal growth of the membrane that deepens the cleavage furrow and divides the cytoplasm…	WD repeat domain 73	CAMOS syndrome
ENST00000409467	NT5C3A	0.000271636	0.00363319	2.74686	0.754434	1.37132	5.105	1.14629	1.41498	0.791239	1.41498	ENSG00000122643	NT5C3A	15.5935	GO:0008253	5'-nucleotidase activity	Catalysis of the reaction: a 5'-ribonucleotide + H2O = a ribonucleoside + phosphate. [EC:3.1.3.5]	5'-nucleotidase, cytosolic IIIA	Hemolytic anemia due to pyrimidine 5' nucleotidase deficiency
ENST00000343164	SLC6A13	8.34581e-08	3.01681e-06	2.7449	0.512157	2.92458	3.0972	0.963716	0.168184	0.216656	0.216656	ENSG00000010379	SLC6A13	15.5631	GO:0015812	gamma-aminobutyric acid transport	The directed movement of gamma-aminobutyric acid (GABA, 4-aminobutyrate), an amino acid which acts as a neurotransmitter in some organisms, into, out of or within a cell, or between cells, by means of some agent such as a transporter or pore. [GOC:go_curators, ISBN:0198506732]	solute carrier family 6 (neurotransmitter transporter), member 13
ENST00000610832	KLF4	1.18677e-24	3.27847e-22	2.74454	0.267767	5.20948	2.96959	0.274715	0.047931	0.0239842	0.047931	ENSG00000136826	KLF4	15.5574	GO:2000342	negative regulation of chemokine (C-X-C motif) ligand 2 production	Any process that stops, prevents or reduces the frequency, rate or extent of chemokine (C-X-C motif) ligand 2 production. [GOC:BHF, GOC:mah]	Kruppel-like factor 4 (gut)	cellular response to laminar fluid shear stress
ENST00000471652	ZC3HAV1	1.7877e-07	6.00606e-06	2.7444	0.525732	4.29129	3.28835	0.240143	1.00363	0.0472142	1.00363	ENSG00000105939	ZC3HAV1	15.5553	GO:1900246	positive regulation of RIG-I signaling pathway	Any process that activates or increases the frequency, rate or extent of RIG-I signaling pathway. [GOC:TermGenie]	zinc finger CCCH-type, antiviral 1	positive regulation of I-kappaB kinase/NF-kappaB signaling
ENST00000504367	TLR3	1.23961e-28	4.34398e-26	2.74378	0.247164	4.93669	2.35757	0.247482	-0.0544581	0.0274232	0.0274232	ENSG00000164342	TLR3	15.5457	GO:0097527	necroptotic signaling pathway	A series of molecular signals which triggers the necroptotic death of a cell. The pathway starts with reception of a signal, is characterized by activation of receptor-interacting serine/threonine-protein kinase 1 and/or 3 (RIPK1/3, also called RIP1/3), and ends when the execution phase of necroptosis is triggered. [GOC:mtg_apoptosis, PMID:20823910]	toll-like receptor 3	HERPES SIMPLEX ENCEPHALITIS SUSCEPTIBILITY TO 7 (1 patient)
ENST00000478861	HELZ2	1.31957e-124	1.42688e-120	2.74329	0.115544	5.28728	2.05132	0.0181675	0.0419097	0.0232515	0.0419097	ENSG00000130589	HELZ2	15.538	GO:0030374	ligand-dependent nuclear receptor transcription coactivator activity	The function of a transcription cofactor that activates transcription in conjuction with a ligand-dependent nuclear receptor from a RNA polymerase II promoter; does not bind DNA itself. [GOC:dph, GOC:tb]	helicase with zinc finger 2, transcriptional coactivator
ENST00000528163	IL32	6.15418e-05	0.00102809	2.7411	0.684108	1.63432	4.02063	1.02171	1.08431	0.654228	1.08431	ENSG00000008517	IL32	15.504	GO:0006952	defense response	Reactions, triggered in response to the presence of a foreign body or the occurrence of an injury, which result in restriction of damage to the organism attacked or prevention/recovery from the infection caused by the attack. [GOC:go_curators]	interleukin 32
ENST00000511577	DDX60L	0.00555584	0.0426723	2.74028	0.988236	2.83789	5.94076	1.0799	3.31485	0.235438	3.31485	ENSG00000181381	DDX60L	15.4914	GO:0004386	helicase activity	Catalysis of the reaction: NTP + H2O = NDP + phosphate, to drive the unwinding of a DNA or RNA helix. [GOC:mah, ISBN:0198506732]	DEAD (Asp-Glu-Ala-Asp) box polypeptide 60-like
ENST00000489809	PARP12	2.3827e-05	0.000452241	2.73719	0.647759	1.63489	2.82797	1.23421	-0.329102	0.65395	0.65395	ENSG00000059378	PARP12	15.4435	GO:0044822	poly(A) RNA binding	Interacting non-covalently with a poly(A) RNA, a RNA molecule which has a tail of adenine bases. [GOC:jl]	poly(ADP-ribose) polymerase family member 12
ENST00000398992	OOSP1	1.26216e-09	6.59782e-08	2.73319	0.450119	1.42029	2.40523	0.147405	0.331576	0.764327	0.764327	ENSG00000214788	OOSP1	15.3818
ENST00000393743	DDX60	2.1502e-54	2.42918e-51	2.72882	0.175705	7.14001	2.34035	0.00258722	0.136337	0.0133282	0.136337	ENSG00000137628	DDX60	15.3148	GO:1900246	positive regulation of RIG-I signaling pathway	Any process that activates or increases the frequency, rate or extent of RIG-I signaling pathway. [GOC:TermGenie]	DEAD (Asp-Glu-Ala-Asp) box polypeptide 60	positive regulation of MDA-5 signaling pathway
ENST00000445241	PPP2R4	0.000535269	0.0064434	2.72827	0.787959	3.54165	6.46222	1.18618	1.60778	0.107107	1.60778	ENSG00000119383	PPP2R4	15.3064	GO:0030472	mitotic spindle organization in nucleus	A process resulting in the assembly, arrangement of constituent parts, or disassembly of the microtubule spindle in the nucleus. The process occurs during a mitotic cell cycle and takes place at the cellular level. [GOC:mah]	protein phosphatase 2A regulatory subunit 4
ENST00000316660	PMAIP1	7.05727e-184	1.78062e-179	2.7255	0.0942488	7.4307	2.05302	0.00240636	0.0375664	0.0127492	0.0375664	ENSG00000141682	PMAIP1	15.2641	GO:0043331	response to dsRNA	Any process that results in a change in state or activity of a cell or an organism (in terms of movement, secretion, enzyme production, gene expression, etc.) as a result of a double-stranded RNA stimulus. [GOC:jl]	phorbol-12-myristate-13-acetate-induced protein 1	retinal cell apoptotic process
ENST00000545093	GOLT1B	1.50921e-06	4.01111e-05	2.72024	0.565538	2.33432	3.53666	0.683545	0.755702	0.372755	0.755702	ENSG00000111711	GOLT1B	15.184	GO:0016192	vesicle-mediated transport	A cellular transport process in which transported substances are moved in membrane-bounded vesicles; transported substances are enclosed in the vesicle lumen or located in the vesicle membrane. The process begins with a step that directs a substance to the forming vesicle, and includes vesicle budding and coating. Vesicles are then targeted to, and fuse with, an acceptor membrane. [GOC:ai, GOC:ma…	golgi transport 1B	positive regulation of I-kappaB kinase/NF-kappaB signaling
ENST00000468663	HLA-C	9.86304e-09	4.415e-07	2.71979	0.474403	2.34118	2.81717	0.642202	0.0317051	0.370562	0.370562	ENSG00000228299	HLA-C	15.1771	GO:0019882	antigen processing and presentation	The process in which an antigen-presenting cell expresses antigen (peptide or lipid) on its cell surface in association with an MHC protein complex. [GO_REF:0000022, GOC:add, GOC:mtg_15nov05, ISBN:0781735149, PMID:15771591, PMID:15928678]	major histocompatibility complex, class I, C	PSORIASIS 1 SUSCEPTIBILITY TO
ENST00000541118	GNA13	1.937e-07	6.44754e-06	2.71869	0.522295	2.68732	3.18574	0.704118	0.523447	0.271413	0.523447	ENSG00000120063	GNA13	15.1605	GO:0031752	D5 dopamine receptor binding	Interacting selectively and non-covalently with a D5 dopamine receptor. [GOC:mah, GOC:nln]	guanine nucleotide binding protein (G protein), alpha 13
ENST00000489652	PARP9	2.21891e-14	2.39937e-12	2.7166	0.355703	3.46512	2.52165	0.451672	-0.241406	0.11769	0.11769	ENSG00000138496	PARP9	15.1288	GO:0060330	regulation of response to interferon-gamma	Any process that modulates the rate, frequency or extent of a response to interferon-gamma. Response to interferon gamma is a change in state or activity of a cell or an organism (in terms of movement, secretion, enzyme production, gene expression, etc.) as a result of an interferon-gamma stimulus. [GOC:dph]	poly(ADP-ribose) polymerase family member 9	double-strand break repair
ENST00000216879	NSFL1C	2.79902e-06	6.96241e-05	2.71451	0.579398	1.18332	2.56612	0.60974	0.0853485	0.900922	0.900922	ENSG00000088833	NSFL1C	15.0972	GO:0031468	nuclear envelope reassembly	The reformation of the nuclear envelope following its breakdown in the context of a normal process. [GOC:mah]	NSFL1 (p97) cofactor (p47)
ENST00000612534	IRF7	0.000711014	0.00813022	2.71393	0.801682	2.16899	4.58732	1.62646	1.26566	0.428564	1.26566	ENSG00000276561	IRF7	15.0885	GO:0005515	protein binding	Interacting selectively and non-covalently with any protein or protein complex (a complex of two or more proteins that may include other nonprotein molecules). [GOC:go_curators]	interferon regulatory factor 7	DNA binding
ENST00000452684	SOD2	4.43131e-17	6.48481e-15	2.7138	0.323038	3.00707	2.50008	0.105308	0.364283	0.199938	0.364283	ENSG00000112096	SOD2	15.0866	GO:0006801	superoxide metabolic process	The chemical reactions and pathways involving superoxide, the superoxide anion O2- (superoxide free radical), or any compound containing this species. [CHEBI:18421, GOC:jl]	uncharacterized LOC100129518	age-dependent response to reactive oxygen species
ENST00000367468	PTGS2	6.8912e-60	9.65954e-57	2.71337	0.166241	5.31713	2.26536	0.0874249	0.0369373	0.0229888	0.0369373	ENSG00000073756	PTGS2	15.0801	GO:0090362	positive regulation of platelet-derived growth factor production	Any process that increases the rate, frequency, or extent of the appearance of any platelet-derived growth factor due to biosynthesis or secretion following a cellular stimulus, resulting in an increase in its intracellular or extracellular levels. [GOC:BHF]	prostaglandin-endoperoxide synthase 2 (prostaglandin G/H synthase and cyclooxygenase)
ENST00000470323	IFI44	2.73555e-38	1.65649e-35	2.71289	0.209679	4.98348	2.265	0.171138	-0.116811	0.0267048	0.0267048	ENSG00000137965	IFI44	15.0728	GO:0009615	response to virus	Any process that results in a change in state or activity of a cell or an organism (in terms of movement, secretion, enzyme production, gene expression, etc.) as a result of a stimulus from a virus. [GOC:hb]	interferon induced protein 44
ENST00000527748	GPR61	1.09188e-08	4.84736e-07	2.71258	0.474575	1.95529	3.31599	0.0962461	0.917251	0.510444	0.917251	ENSG00000156097	GPR61	15.0681	GO:0043235	receptor complex	Any protein complex that undergoes combination with a hormone, neurotransmitter, drug or intracellular messenger to initiate a change in cell function. [GOC:go_curators]	G protein-coupled receptor 61
ENST00000475315	FXR1	0.000592134	0.00699008	2.71229	0.78956	2.19415	5.98266	1.83587	0.969453	0.419658	0.969453	ENSG00000114416	FXR1	15.0638				fragile X mental retardation, autosomal homolog 1
ENST00000480916	SP110	1.88549e-12	1.56147e-10	2.70931	0.384698	2.28752	2.60177	0.278016	0.333206	0.38795	0.38795	ENSG00000135899	SP110	15.0189	GO:0016032	viral process	A multi-organism process in which a virus is a participant. The other participant is the host. Includes infection of a host cell, replication of the viral genome, and assembly of progeny virus particles. In some cases the viral genetic material may integrate into the host genome and only subsequently, under particular circumstances, 'complete' its life cycle. [GOC:bf, GOC:jl, GOC:mah]	SP110 nuclear body protein	Hepatic veno-occlusive disease - immunodeficiency
ENST00000449261	BRPF3	0.000869654	0.00962379	2.70925	0.813683	2.84796	5.35141	1.70666	1.2727	0.233186	1.2727	ENSG00000096070	BRPF3	15.0181	GO:0002576	platelet degranulation	The regulated exocytosis of secretory granules containing preformed mediators such as histamine and serotonin by a platelet. [GOC:add]	bromodomain and PHD finger containing 3
ENST00000528604	MVB12A	3.40754e-08	1.34617e-06	2.70847	0.490745	2.23732	2.80087	0.679002	-0.0714528	0.404738	0.404738	ENSG00000141971	MVB12A	15.0063	GO:0005654	nucleoplasm	That part of the nuclear content other than the chromosomes or the nucleolus. [GOC:ma, ISBN:0124325653]	multivesicular body subunit 12A	calcium-dependent phospholipid binding
ENST00000537828	EPSTI1	2.64675e-05	0.000495357	2.7059	0.64397	1.59421	3.76192	1.19218	0.263965	0.673954	0.673954	ENSG00000133106	EPSTI1	14.9678				epithelial stromal interaction 1 (breast)
ENST00000393081	ACSL5	0.000210174	0.00292924	2.70518	0.729855	1.30552	3.65663	1.56863	0.375232	0.828465	0.828465	ENSG00000197142	ACSL5	14.957	GO:2001236	regulation of extrinsic apoptotic signaling pathway	Any process that modulates the frequency, rate or extent of extrinsic apoptotic signaling pathway. [GOC:mtg_apoptosis]	acyl-CoA synthetase long-chain family member 5
ENST00000591220	DHX58	3.59562e-09	1.73906e-07	2.70382	0.458135	1.42564	2.58185	0.183071	0.467822	0.761425	0.761425	ENSG00000108771	DHX58	14.9367				DEXH (Asp-Glu-X-His) box polypeptide 58	negative regulation of MDA-5 signaling pathway
ENST00000482953	MX2	4.14004e-19	7.55114e-17	2.70199	0.302468	3.90715	2.46832	0.0611673	0.350523	0.0708445	0.350523	ENSG00000183486	MX2	14.9094	GO:0046822	regulation of nucleocytoplasmic transport	Any process that modulates the frequency, rate or extent of the directed movement of substances between the nucleus and the cytoplasm. [GOC:bf]	MX dynamin-like GTPase 2	GTP binding
ENST00000454223	HELZ2	1.14337e-42	8.24238e-40	2.70085	0.197267	3.68058	2.01767	0.0843929	-0.00604579	0.0907212	0.0907212	ENSG00000130589	HELZ2	14.8925	GO:0030374	ligand-dependent nuclear receptor transcription coactivator activity	The function of a transcription cofactor that activates transcription in conjuction with a ligand-dependent nuclear receptor from a RNA polymerase II promoter; does not bind DNA itself. [GOC:dph, GOC:tb]	helicase with zinc finger 2, transcriptional coactivator
ENST00000519138	MCM4	5.86322e-05	0.000984483	2.69982	0.67189	1.11731	3.62839	1.08953	0.429142	0.941932	0.941932	ENSG00000104738	MCM4	14.8771				minichromosome maintenance complex component 4	Primary immunodeficiency with natural-killer cell deficiency and adrenal insufficiency
ENST00000258381	SP110	5.00873e-07	1.49262e-05	2.69892	0.536995	4.93153	3.39261	0.437632	0.860002	0.0275064	0.860002	ENSG00000135899	SP110	14.8637	GO:0016032	viral process	A multi-organism process in which a virus is a participant. The other participant is the host. Includes infection of a host cell, replication of the viral genome, and assembly of progeny virus particles. In some cases the viral genetic material may integrate into the host genome and only subsequently, under particular circumstances, 'complete' its life cycle. [GOC:bf, GOC:jl, GOC:mah]	SP110 nuclear body protein	Hepatic veno-occlusive disease - immunodeficiency
ENST00000490054	HLA-B	1.03694e-07	3.64557e-06	2.69566	0.506691	1.5587	4.02598	0.463552	0.559922	0.69176	0.69176	ENSG00000206450	HLA-B	14.8153	GO:0019882	antigen processing and presentation	The process in which an antigen-presenting cell expresses antigen (peptide or lipid) on its cell surface in association with an MHC protein complex. [GO_REF:0000022, GOC:add, GOC:mtg_15nov05, ISBN:0781735149, PMID:15771591, PMID:15928678]	major histocompatibility complex, class I, B	SEVERE CUTANEOUS ADVERSE REACTION SUSCEPTIBILITY TO TOXIC EPIDERMAL NECROLYSIS SUSCEPTIBILITY TO INCLUDED
ENST00000577910	RPL17-C18orf32	0.000590431	0.00697651	2.69544	0.784477	3.17838	4.39758	1.25855	1.51077	0.166272	1.51077	ENSG00000215472	RPL17-C18orf32	14.8121	GO:0015934	large ribosomal subunit	The larger of the two subunits of a ribosome. Two sites on the ribosomal large subunit are involved in translation, namely the aminoacyl site (A site) and peptidyl site (P site). [ISBN:0198506732]	RPL17-C18orf32 readthrough
ENST00000447275	PDE4C	1.11951e-08	4.95549e-07	2.69494	0.47184	1.58568	2.57947	0.32365	0.334689	0.678201	0.678201	ENSG00000105650	PDE4C	14.8046	GO:0006198	cAMP catabolic process	The chemical reactions and pathways resulting in the breakdown of the nucleotide cAMP (cyclic AMP, adenosine 3',5'-cyclophosphate). [ISBN:0198506732]	uncharacterized LOC729966
ENST00000422380	PCYOX1	0.000612698	0.00718911	2.6896	0.785072	1.53436	5.78472	0.901128	1.87239	0.704155	1.87239	ENSG00000116005	PCYOX1	14.7258	GO:0016670	oxidoreductase activity, acting on a sulfur group of donors, oxygen as acceptor	Catalysis of an oxidation-reduction (redox) reaction in which a sulfur-containing group acts as a hydrogen or electron donor and reduces oxygen. [GOC:jl]	prenylcysteine oxidase 1
ENST00000298690	RNASE7	1.51289e-07	5.16257e-06	2.68	0.51038	0.987614	2.31265	0.14567	0.179838	1.02652	1.02652	ENSG00000165799	RNASE7	14.585	GO:0051673	membrane disruption in other organism	The disruption of the membranes of another organism, leading to damage to its cells and possibly death of that organism. [GOC:ai]	ribonuclease, RNase A family, 7
ENST00000542657	ANKLE2	0.00207751	0.0195491	2.67964	0.870316	1.43609	5.10875	2.15093	1.2576	0.755781	1.2576	ENSG00000176915	ANKLE2	14.5798	GO:0042326	negative regulation of phosphorylation	Any process that stops, prevents or decreases the rate of addition of phosphate groups to a molecule. [GOC:jl]	ankyrin repeat and LEM domain containing 2	Autosomal recessive primary microcephaly
ENST00000342266	AKAP7	2.92012e-06	7.22559e-05	2.67942	0.572971	1.27341	2.82218	0.630254	0.267847	0.847077	0.847077	ENSG00000118507	AKAP7	14.5766	GO:0051018	protein kinase A binding	Interacting selectively and non-covalently with any subunit of protein kinase A. [GOC:ai]	A-kinase anchoring protein 7
ENST00000536985	PFKFB3	0.00130175	0.013437	2.67699	0.832502	3.10154	4.69149	2.17775	0.941015	0.18114	0.941015	ENSG00000170525	PFKFB3	14.5412	GO:0061621	canonical glycolysis	The glycolytic process that begins with the conversion of glucose to glucose-6-phosphate by glucokinase activity. Glycolytic processes are the chemical reactions and pathways resulting in the breakdown of a carbohydrate into pyruvate, with the concomitant production of a small amount of ATP. [GOC:dph, ISBN:0201090910, ISBN:0879010479]	6-phosphofructo-2-kinase/fructose-2,6-biphosphatase 3
ENST00000397881	C19orf66	2.75414e-07	8.81103e-06	2.6765	0.520766	4.15028	2.9822	0.491186	0.729202	0.0546465	0.729202	ENSG00000130813	C19orf66	14.5341	GO:0005515	protein binding	Interacting selectively and non-covalently with any protein or protein complex (a complex of two or more proteins that may include other nonprotein molecules). [GOC:go_curators]	chromosome 19 open reading frame 66
ENST00000310232	CCDC13	2.50833e-09	1.24664e-07	2.67235	0.448312	2.3274	3.62772	0.109468	0.794957	0.374978	0.794957	ENSG00000244607	CCDC13	14.4739	GO:0034451	centriolar satellite	A small (70-100 nm) cytoplasmic granule that contains a number of centrosomal proteins; centriolar satellites traffic toward microtubule minus ends and are enriched near the centrosome. [GOC:BHF, PMID:10579718, PMID:12403812]	coiled-coil domain containing 13	cellular response to DNA damage stimulus
ENST00000394973	KCNG3	7.45773e-08	2.72836e-06	2.67035	0.496369	1.28364	2.26457	0.267601	0.121699	0.841117	0.841117	ENSG00000171126	KCNG3	14.4451	GO:0005251	delayed rectifier potassium channel activity	Enables the transmembrane transfer of a potassium ion by a delayed rectifying voltage-gated channel. A delayed rectifying current-voltage relation is one where channel activation kinetics are time-dependent, and inactivation is slow. [GOC:mah, PMID:11343411, PMID:2462513]	potassium channel, voltage gated modifier subfamily G, member 3
ENST00000417453	ESAM	5.07783e-05	0.000869759	2.66819	0.658484	1.34459	3.63472	0.650893	1.30031	0.806215	1.30031	ENSG00000149564	ESAM	14.4138	GO:0050900	leukocyte migration	The movement of a leukocyte within or between different tissues and organs of the body. [GOC:add, ISBN:0781735149, PMID:14680625, PMID:14708592, PMID:7507411, PMID:8600538]	endothelial cell adhesion molecule
ENST00000584661	LGALS9	1.6813e-05	0.000337566	2.66437	0.619119	1.61768	3.85391	1.06253	-0.0975635	0.662362	0.662362	ENSG00000168961	LGALS9	14.3589	GO:2001269	positive regulation of cysteine-type endopeptidase activity involved in apoptotic signaling pathway	Any process that activates or increases the frequency, rate or extent of cysteine-type endopeptidase activity involved in apoptotic signaling pathway. [GOC:mtg_apoptosis]	lectin, galactoside-binding, soluble, 9	cellular response to virus
ENST00000549780	TGIF1	3.27512e-07	1.02482e-05	2.66391	0.521631	2.50328	2.47745	0.903164	-0.249	0.321282	0.321282	ENSG00000177426	TGIF1	14.3523	GO:0006355	regulation of transcription, DNA-templated	Any process that modulates the frequency, rate or extent of cellular DNA-templated transcription. [GOC:go_curators, GOC:txnOH]	TGFB-induced factor homeobox 1	Alobar holoprosencephaly
ENST00000462745	MME	0.00111504	0.011864	2.6621	0.816655	2.66677	4.94108	1.41122	1.58994	0.276658	1.58994	ENSG00000196549	MME	14.3264	GO:0071492	cellular response to UV-A	Any process that results in a change in state or activity of a cell (in terms of movement, secretion, enzyme production, gene expression, etc.) as a result of a UV-A radiation stimulus. UV-A radiation (UV-A light) spans the wavelengths 315 to 400 nm. [GOC:mah]	membrane metallo-endopeptidase	creatinine metabolic process
ENST00000496624	PARP12	2.15478e-15	2.63919e-13	2.65987	0.33533	2.90174	2.54733	0.151864	0.354144	0.221469	0.354144	ENSG00000059378	PARP12	14.2944	GO:0044822	poly(A) RNA binding	Interacting non-covalently with a poly(A) RNA, a RNA molecule which has a tail of adenine bases. [GOC:jl]	poly(ADP-ribose) polymerase family member 12
ENST00000484111	PARP12	2.09473e-12	1.72719e-10	2.65973	0.378446	2.26969	2.28782	0.250655	0.215771	0.393843	0.393843	ENSG00000059378	PARP12	14.2925	GO:0044822	poly(A) RNA binding	Interacting non-covalently with a poly(A) RNA, a RNA molecule which has a tail of adenine bases. [GOC:jl]	poly(ADP-ribose) polymerase family member 12
ENST00000528548	NDUFV1	0.000444591	0.00553768	2.6595	0.757241	1.66839	4.26666	1.94258	0.372384	0.637785	0.637785	ENSG00000167792	NDUFV1	14.2892	GO:0009060	aerobic respiration	The enzymatic release of energy from inorganic and organic compounds (especially carbohydrates and fats) which requires oxygen as the terminal electron acceptor. [GOC:das, GOC:jl, ISBN:0140513590]	NADH:ubiquinone oxidoreductase core subunit V1	Isolated NADH-CoQ reductase deficiency
ENST00000513490	PDZD2	3.57447e-08	1.40188e-06	2.65817	0.482367	3.60524	2.81956	0.285779	0.761272	0.0991524	0.761272	ENSG00000133401	PDZD2	14.2702	GO:0005515	protein binding	Interacting selectively and non-covalently with any protein or protein complex (a complex of two or more proteins that may include other nonprotein molecules). [GOC:go_curators]	PDZ domain containing 2
ENST00000444643	DNAJB12	0.00533886	0.0414009	2.65778	0.95403	1.55772	5.53965	1.79488	2.3009	0.69226	2.3009	ENSG00000148719	DNAJB12	14.2646	GO:0016020	membrane	A lipid bilayer along with all the proteins and protein complexes embedded in it an attached to it. [GOC:dos, GOC:mah, ISBN:0815316194]	DnaJ heat shock protein family (Hsp40) member B12
ENST00000421365	IFIH1	2.25759e-20	4.54477e-18	2.65699	0.287261	3.75666	2.80454	0.210206	0.161129	0.0832888	0.161129	ENSG00000115267	IFIH1	14.2534	GO:0039530	MDA-5 signaling pathway	Any series of molecular signals generated as a consequence of the cytoplasmic pattern recognition receptor (PRR) MDA-5 (also known as IFIH1) binding to viral RNA. MDA-5 detects RNA synthesized during active viral replication and triggers a signaling pathway to protect the host against viral infection, for example by inducing the expression of antiviral cytokines. [GOC:bf, PMID:19620789]	interferon induced, with helicase C domain 1	Aicardi-Goutieres Syndrome
ENST00000582719	PER1	4.91767e-05	0.000845867	2.65636	0.654355	2.61672	4.60338	1.47518	0.451626	0.289774	0.451626	ENSG00000179094	PER1	14.2443	GO:1900744	regulation of p38MAPK cascade	Any process that modulates the frequency, rate or extent of p38MAPK cascade. [GOC:TermGenie]	period circadian clock 1	regulation of hair cycle by canonical Wnt signaling pathway
ENST00000417972	NR4A2	2.75458e-05	0.00051204	2.65617	0.633497	1.459	3.46645	0.926384	0.879551	0.743515	0.879551	ENSG00000153234	NR4A2	14.2416	GO:0031668	cellular response to extracellular stimulus	Any process that results in a change in state or activity of a cell (in terms of movement, secretion, enzyme production, gene expression, etc.) as a result of an extracellular stimulus. [GOC:mah]	nuclear receptor subfamily 4 group A member 2	negative regulation of apoptotic signaling pathway
ENST00000531912	IRF7	6.9568e-08	2.55746e-06	2.65605	0.492564	3.11431	3.14939	0.724473	0.367315	0.178634	0.367315	ENSG00000185507	IRF7	14.2399	GO:0005515	protein binding	Interacting selectively and non-covalently with any protein or protein complex (a complex of two or more proteins that may include other nonprotein molecules). [GOC:go_curators]	interferon regulatory factor 7	DNA binding
ENST00000477868	CDC73	3.62895e-06	8.73129e-05	2.65505	0.57325	2.01702	3.2292	0.993131	-0.0998833	0.48564	0.48564	ENSG00000134371	CDC73	14.2257	GO:0001711	endodermal cell fate commitment	The cell differentiation process that results in commitment of a cell to become part of the endoderm. [GOC:go_curators, ISBN:0878932437]	cell division cycle 73	Familial isolated hyperparathyroidism
ENST00000452106	L3MBTL2	0.000246927	0.00335921	2.65434	0.724156	3.72464	4.59478	1.38995	0.969856	0.086286	0.969856	ENSG00000100395	L3MBTL2	14.2156	GO:0005515	protein binding	Interacting selectively and non-covalently with any protein or protein complex (a complex of two or more proteins that may include other nonprotein molecules). [GOC:go_curators]	l(3)mbt-like 2 (Drosophila)
ENST00000540313	RGAG1	0.00368713	0.0309241	2.65399	0.913984	1.98594	5.18655	2.09211	1.66704	0.498014	1.66704	ENSG00000243978	RGAG1	14.2106				retrotransposon gag domain containing 1
ENST00000368020	USF1	0.000212905	0.00295824	2.65204	0.716149	3.48755	4.38711	1.13904	1.16888	0.114476	1.16888	ENSG00000158773	USF1	14.1829	GO:0045990	carbon catabolite regulation of transcription	A transcription regulation process in which the presence of one carbon source leads to the modulation of the frequency, rate, or extent of transcription of specific genes involved in the metabolism of other carbon sources. [GOC:go_curators, GOC:mah, PMID:18359269, PMID:9618445]	upstream transcription factor 1	positive regulation of transcription from RNA polymerase II promoter
ENST00000483180	NFKBIZ	0.000194071	0.0027386	2.65071	0.711294	2.73268	3.92315	1.32091	0.955809	0.26012	0.955809	ENSG00000144802	NFKBIZ	14.1642				nuclear factor of kappa light polypeptide gene enhancer in B-cells inhibitor, zeta
ENST00000403527	ETV1	0.000126351	0.00189836	2.64888	0.690989	1.26998	4.28066	0.994725	1.15387	0.849085	1.15387	ENSG00000006468	ETV1	14.1382	GO:0048935	peripheral nervous system neuron development	The process whose specific outcome is the progression of a neuron whose cell body is located in the peripheral nervous system, from initial commitment of the cell to a neuronal fate, to the fully functional differentiated neuron. [GOC:dgh]	ets variant 1	Ewing sarcoma
ENST00000466597	PARP12	3.58528e-12	2.85064e-10	2.64714	0.380739	2.09375	2.58281	0.196213	0.289083	0.456115	0.456115	ENSG00000059378	PARP12	14.1136	GO:0044822	poly(A) RNA binding	Interacting non-covalently with a poly(A) RNA, a RNA molecule which has a tail of adenine bases. [GOC:jl]	poly(ADP-ribose) polymerase family member 12
ENST00000334529	BTLA	3.19325e-11	2.18871e-09	2.64427	0.398392	1.84172	2.43124	0.155722	0.461777	0.558499	0.558499	ENSG00000186265	BTLA	14.0732	GO:0031295	T cell costimulation	The process of providing, via surface-bound receptor-ligand pairs, a second, antigen-independent, signal in addition to that provided by the T cell receptor to augment T cell activation. [ISBN:0781735149]	B and T lymphocyte associated
ENST00000381718	NUP58	0.000721904	0.00823807	2.64274	0.781617	3.7105	4.45955	0.783005	1.96616	0.0876696	1.96616	ENSG00000139496	NUP58	14.0517	GO:1900034	regulation of cellular response to heat	Any process that modulates the frequency, rate or extent of cellular response to heat. [GOC:TermGenie, GOC:yaf]	nucleoporin 58kDa
ENST00000422202	COL20A1	2.99153e-08	1.19492e-06	2.63976	0.476326	1.33977	2.30507	0.212055	0.30188	0.808933	0.808933	ENSG00000101203	COL20A1	14.0099	GO:0005788	endoplasmic reticulum lumen	The volume enclosed by the membranes of the endoplasmic reticulum. [ISBN:0198547684]	collagen, type XX, alpha 1
ENST00000555410	WARS	1.01656e-06	2.81143e-05	2.63148	0.538311	2.97598	3.04579	0.802074	0.501932	0.206166	0.501932	ENSG00000140105	WARS	13.8944	GO:0006436	tryptophanyl-tRNA aminoacylation	The process of coupling tryptophan to tryptophanyl-tRNA, catalyzed by tryptophanyl-tRNA synthetase. In tRNA aminoacylation, the amino acid is first activated by linkage to AMP and then transferred to either the 2'- or the 3'-hydroxyl group of the 3'-adenosine residue of the tRNA. [GOC:mcc, ISBN:0716730510]	tryptophanyl-tRNA synthetase
ENST00000430339	BCL6	5.60008e-06	0.000128684	2.63109	0.579414	2.21564	3.71171	1.09857	0.0481549	0.412173	0.412173	ENSG00000113916	BCL6	13.8889	GO:0002903	negative regulation of B cell apoptotic process	Any process that stops, prevents, or reduces the frequency, rate, or extent of B cell apoptotic process. [GOC:add, GOC:mtg_apoptosis]	B-cell CLL/lymphoma 6	Follicular lymphoma
ENST00000465926	TAF8	2.50636e-06	6.29652e-05	2.62714	0.558063	1.31856	3.61293	0.580462	0.639831	0.82099	0.82099	ENSG00000137413	TAF8	13.8342	GO:0046982	protein heterodimerization activity	Interacting selectively and non-covalently with a nonidentical protein to form a heterodimer. [GOC:ai]	TATA-box binding protein associated factor 8
ENST00000264553	GZMM	1.46183e-06	3.90025e-05	2.62575	0.545171	1.66617	2.72993	0.698599	0.267255	0.638851	0.638851	ENSG00000197540	GZMM	13.8149	GO:0004252	serine-type endopeptidase activity	Catalysis of the hydrolysis of internal, alpha-peptide bonds in a polypeptide chain by a catalytic mechanism that involves a catalytic triad consisting of a serine nucleophile that is activated by a proton relay involving an acidic residue (e.g. aspartate or glutamate) and a basic residue (usually histidine). [GOC:mah, http://merops.sanger.ac.uk/about/glossary.htm#CATTYPE, ISBN:0716720094]	granzyme M	regulation of mitochondrial membrane permeability involved in programmed necrotic cell death
ENST00000490329	SLC9A1	1.53408e-07	5.22118e-06	2.62455	0.500065	1.91766	2.8177	0.599276	0.464275	0.526018	0.526018	ENSG00000090020	SLC9A1	13.7984	GO:0098719	sodium ion import across plasma membrane	The directed movement of sodium ions from outside of a cell, across the plasma membrane and into the cytosol. [GOC:dos]	solute carrier family 9, subfamily A (NHE1, cation proton antiporter 1), member 1	cellular response to epinephrine stimulus
ENST00000613104	ATF3	2.31188e-11	1.62482e-09	2.62186	0.39221	4.48368	2.48449	0.653149	-0.232365	0.0390818	0.0390818	ENSG00000162772	ATF3	13.7613	GO:0043565	sequence-specific DNA binding	Interacting selectively and non-covalently with DNA of a specific nucleotide composition, e.g. GC-rich DNA binding, or with a specific sequence motif or type of DNA e.g. promotor binding or rDNA binding. [GOC:jl]	activating transcription factor 3	positive regulation of TRAIL-activated apoptotic signaling pathway
ENST00000458069	IRF1	5.16906e-07	1.53677e-05	2.61329	0.520582	1.34886	2.44856	0.415717	0.301817	0.803809	0.803809	ENSG00000125347	IRF1	13.6438	GO:2000564	regulation of CD8-positive, alpha-beta T cell proliferation	Any process that modulates the frequency, rate or extent of CD8-positive, alpha-beta T cell proliferation. [GOC:obol]	interferon regulatory factor 1	RNA polymerase II core promoter proximal region sequence-specific DNA binding
ENST00000512371	DDX60L	1.28253e-09	6.69506e-08	2.61104	0.430185	2.51665	2.54832	0.308778	0.52399	0.31744	0.52399	ENSG00000181381	DDX60L	13.6132	GO:0004386	helicase activity	Catalysis of the reaction: NTP + H2O = NDP + phosphate, to drive the unwinding of a DNA or RNA helix. [GOC:mah, ISBN:0198506732]	DEAD (Asp-Glu-Ala-Asp) box polypeptide 60-like
ENST00000566524	TIPIN	0.000130481	0.0019515	2.59821	0.679174	2.2263	3.81142	1.09227	0.983481	0.408503	0.983481	ENSG00000075131	TIPIN	13.4397	GO:0033262	regulation of nuclear cell cycle DNA replication	Any process that modulates the frequency, rate or extent of The DNA-dependent DNA replication that occurs in the nucleus of eukaryotic organisms as part of the cell cycle. [GOC:mtg_cell_cycle]	TIMELESS interacting protein	DNA replication checkpoint
ENST00000429576	MCTP1	0.00013659	0.00203162	2.59666	0.680776	2.1397	3.80994	1.0071	1.07845	0.439126	1.07845	ENSG00000175471	MCTP1	13.4188	GO:0005515	protein binding	Interacting selectively and non-covalently with any protein or protein complex (a complex of two or more proteins that may include other nonprotein molecules). [GOC:go_curators]	multiple C2 domains, transmembrane 1
ENST00000361548	GRHL3	1.80316e-06	4.69671e-05	2.5962	0.543785	2.38273	3.39294	0.973197	0.294786	0.357463	0.357463	ENSG00000158055	GRHL3	13.4127	GO:0001228	transcriptional activator activity, RNA polymerase II transcription regulatory region sequence-specific binding	Interacting selectively and non-covalently with a sequence of DNA that is in the transcription regulatory region for RNA polymerase II (RNAP II) in order to activate or increase the frequency, rate or extent of transcription from the RNAP II promoter. [GOC:krc]	grainyhead-like transcription factor 3	Van der Woude syndrome
ENST00000479990	HLA-B	2.51415e-12	2.04408e-10	2.59391	0.370425	2.53984	2.63954	0.306611	0.206317	0.310857	0.310857	ENSG00000206450	HLA-B	13.382	GO:0019882	antigen processing and presentation	The process in which an antigen-presenting cell expresses antigen (peptide or lipid) on its cell surface in association with an MHC protein complex. [GO_REF:0000022, GOC:add, GOC:mtg_15nov05, ISBN:0781735149, PMID:15771591, PMID:15928678]	major histocompatibility complex, class I, B	SEVERE CUTANEOUS ADVERSE REACTION SUSCEPTIBILITY TO TOXIC EPIDERMAL NECROLYSIS SUSCEPTIBILITY TO INCLUDED
ENST00000532469	POLA2	4.38508e-05	0.000765145	2.59202	0.634335	1.21981	3.44694	0.415599	1.39511	0.878823	1.39511	ENSG00000014138	POLA2	13.3567	GO:0032201	telomere maintenance via semi-conservative replication	The process in which telomeric DNA is synthesized semi-conservatively by the conventional replication machinery and telomeric accessory factors as part of cell cycle DNA replication. [GOC:vw, PMID:16598261]	polymerase (DNA directed), alpha 2, accessory subunit
ENST00000457205	SMOX	4.95455e-05	0.000850589	2.58959	0.638181	3.44119	4.08592	1.49395	0.338787	0.121223	0.338787	ENSG00000088826	SMOX	13.3243	GO:0052895	N1-acetylspermine:oxygen oxidoreductase (N1-acetylspermidine-forming) activity	Catalysis of the reaction: N1-acetylspermine + oxygen + H2O = N1-acetylspermidine + 3-aminopropanal + hydrogen peroxide. [MetaCyc:POLYAMINE-OXIDASE-RXN]	spermine oxidase
ENST00000527022	UBE2L6	3.73666e-06	8.95342e-05	2.58841	0.559594	1.3347	2.2274	0.597348	-0.0857056	0.811806	0.811806	ENSG00000156587	UBE2L6	13.3086	GO:0032480	negative regulation of type I interferon production	Any process that stops, prevents, or reduces the frequency, rate, or extent of type I interferon production. Type I interferons include the interferon-alpha, beta, delta, episilon, zeta, kappa, tau, and omega gene families. [GOC:add, GOC:mah]	ubiquitin conjugating enzyme E2L 6
ENST00000529993	LRP5	0.000243813	0.00332102	2.58828	0.705509	1.35713	3.75228	1.24341	0.996433	0.799164	0.996433	ENSG00000162337	LRP5	13.3069	GO:0061304	retinal blood vessel morphogenesis	The process whose specific outcome is the progression of a blood vessel of the retina over time, from its formation to the mature structure. [GOC:BHF, GOC:dph]	LDL receptor related protein 5	Autosomal dominant osteopetrosis type 1
ENST00000379958	SAMD9	1.01553e-25	2.9679e-23	2.58628	0.246671	8.26695	2.03147	0.00245197	0.271358	0.0121532	0.271358	ENSG00000205413	SAMD9	13.2802	GO:0005515	protein binding	Interacting selectively and non-covalently with any protein or protein complex (a complex of two or more proteins that may include other nonprotein molecules). [GOC:go_curators]	sterile alpha motif domain containing 9	Normocalcemic tumoral calcinosis
ENST00000492877	THEMIS2	3.8876e-17	5.74735e-15	2.58515	0.307162	3.11391	1.93974	0.245855	-0.067818	0.178714	0.178714	ENSG00000130775	THEMIS2	13.2653	GO:0005515	protein binding	Interacting selectively and non-covalently with any protein or protein complex (a complex of two or more proteins that may include other nonprotein molecules). [GOC:go_curators]	thymocyte selection associated family member 2
ENST00000395473	LGALS9	1.85631e-07	6.21174e-06	2.58416	0.495698	3.28734	3.17517	0.662987	0.442737	0.14632	0.442737	ENSG00000168961	LGALS9	13.2522	GO:2001269	positive regulation of cysteine-type endopeptidase activity involved in apoptotic signaling pathway	Any process that activates or increases the frequency, rate or extent of cysteine-type endopeptidase activity involved in apoptotic signaling pathway. [GOC:mtg_apoptosis]	lectin, galactoside-binding, soluble, 9	cellular response to virus
ENST00000592131	ATP4A	2.37805e-07	7.72207e-06	2.58219	0.49974	1.55572	2.27722	0.43056	0.142816	0.693269	0.693269	ENSG00000105675	ATP4A	13.226	GO:0008900	hydrogen:potassium-exchanging ATPase activity	Catalysis of the transfer of a solute or solutes from one side of a membrane to the other according to the reaction: ATP + H2O + H+(in) + K+(out) = ADP + phosphate + H+(out) + K+(in). [EC:3.6.3.10]	ATPase, H+/K+ exchanging, alpha polypeptide
ENST00000223293	GIMAP2	2.78531e-09	1.37599e-07	2.58163	0.434342	1.76341	2.52644	0.187507	0.661432	0.593441	0.661432	ENSG00000106560	GIMAP2	13.2187	GO:0005811	lipid particle	An intracellular non-membrane-bounded organelle comprising a matrix of coalesced lipids surrounded by a phospholipid monolayer. May include associated proteins. [GOC:mah, GOC:tb]	GTPase, IMAP family member 2
ENST00000370471	FMR1	0.000469391	0.00578847	2.57813	0.737104	1.42227	3.99593	1.6817	0.760158	0.763251	0.763251	ENSG00000102081	FMR1	13.1724	GO:0042788	polysomal ribosome	A ribosome bound to mRNA that forms part of a polysome. [GOC:jl]	fragile X mental retardation 1	Fragile X syndrome
ENST00000568746	IL4R	7.76451e-05	0.00125501	2.57787	0.652368	1.69061	3.53215	1.11245	0.802678	0.627221	0.802678	ENSG00000077238	IL4R	13.169	GO:0002532	production of molecular mediator involved in inflammatory response	The synthesis or release of any molecular mediator of the inflammatory response following an inflammatory stimulus, resulting in an increase in its intracellular or extracellular levels. [GOC:add, GOC:dph, GOC:tb, ISBN:0781735149]	interleukin 4 receptor
ENST00000531688	IFITM3	1.18108e-20	2.4493e-18	2.57777	0.276633	3.79081	1.8896	0.264081	-0.158229	0.0802839	0.0802839	ENSG00000142089	IFITM3	13.1678	GO:0035455	response to interferon-alpha	Any process that results in a change in state or activity of a cell or an organism (in terms of movement, secretion, enzyme production, gene expression, etc.) as a result of an interferon-alpha stimulus. Interferon-alpha is a type I interferon. [GOC:sl, PMID:11356686]	interferon induced transmembrane protein 3	negative regulation of viral entry into host cell
ENST00000263464	BIRC3	3.44337e-50	3.52215e-47	2.57773	0.173036	5.6816	2.00755	0.0112635	0.123473	0.0201192	0.123473	ENSG00000023445	BIRC3	13.1672	GO:2000116	regulation of cysteine-type endopeptidase activity	Any process that modulates the frequency, rate or extent of cysteine-type endopeptidase activity. [GOC:obol, GOC:yaf]	baculoviral IAP repeat containing 3	MALT lymphoma
ENST00000547837	SPRYD3	0.00176812	0.0171707	2.57733	0.824312	2.54144	4.69789	1.36505	1.69265	0.310407	1.69265	ENSG00000167778	SPRYD3	13.162	GO:0005515	protein binding	Interacting selectively and non-covalently with any protein or protein complex (a complex of two or more proteins that may include other nonprotein molecules). [GOC:go_curators]	SPRY domain containing 3
ENST00000543406	SLC15A3	9.99195e-13	8.60433e-11	2.57696	0.361393	2.43685	2.39928	0.246843	0.100054	0.340879	0.340879	ENSG00000110446	SLC15A3	13.157	GO:0006810	transport	The directed movement of substances (such as macromolecules, small molecules, ions) into, out of or within a cell, or between cells, or within a multicellular organism by means of some agent such as a transporter or pore. [GOC:dph, GOC:jl, GOC:mah]	solute carrier family 15 (oligopeptide transporter), member 3
ENST00000548476	IL32	6.80433e-05	0.00112038	2.57533	0.646576	1.41328	3.30779	1.11314	0.468172	0.768136	0.768136	ENSG00000008517	IL32	13.1356	GO:0006952	defense response	Reactions, triggered in response to the presence of a foreign body or the occurrence of an injury, which result in restriction of damage to the organism attacked or prevention/recovery from the infection caused by the attack. [GOC:go_curators]	interleukin 32
ENST00000523847	LY6E	4.71654e-07	1.4167e-05	2.57396	0.510959	2.47668	2.86709	0.462226	0.71263	0.32903	0.71263	ENSG00000160932	LY6E	13.1176				lymphocyte antigen 6 complex, locus E
ENST00000489383	PARP12	6.86642e-11	4.46896e-09	2.56936	0.393859	2.37136	2.41381	0.147811	0.550253	0.361016	0.550253	ENSG00000059378	PARP12	13.0575	GO:0044822	poly(A) RNA binding	Interacting non-covalently with a poly(A) RNA, a RNA molecule which has a tail of adenine bases. [GOC:jl]	poly(ADP-ribose) polymerase family member 12
ENST00000446033	SAMD9L	5.27167e-06	0.000121729	2.56834	0.564015	2.36562	3.11818	0.854564	0.576942	0.362817	0.576942	ENSG00000177409	SAMD9L	13.0441	GO:0005515	protein binding	Interacting selectively and non-covalently with any protein or protein complex (a complex of two or more proteins that may include other nonprotein molecules). [GOC:go_curators]	sterile alpha motif domain containing 9-like
ENST00000313059	PARP10	7.57087e-27	2.35828e-24	2.56314	0.238935	4.56934	1.93277	0.22078	-0.0666677	0.036124	0.036124	ENSG00000178685	PARP10	12.9765	GO:0005794	Golgi apparatus	A compound membranous cytoplasmic organelle of eukaryotic cells, consisting of flattened, ribosome-free vesicles arranged in a more or less regular stack. The Golgi apparatus differs from the endoplasmic reticulum in often having slightly thicker membranes, appearing in sections as a characteristic shallow semicircle so that the convex side (cis or entry face) abuts the endoplasmic reticulum, sec…	poly(ADP-ribose) polymerase family member 10	K63-linked polyubiquitin binding
ENST00000341491	ATF3	1.47323e-10	9.11053e-09	2.56289	0.399944	6.07501	2.43618	0.702689	-0.371794	0.0171112	0.0171112	ENSG00000162772	ATF3	12.9733	GO:0043565	sequence-specific DNA binding	Interacting selectively and non-covalently with DNA of a specific nucleotide composition, e.g. GC-rich DNA binding, or with a specific sequence motif or type of DNA e.g. promotor binding or rDNA binding. [GOC:jl]	activating transcription factor 3	positive regulation of TRAIL-activated apoptotic signaling pathway
ENST00000526811	IFITM3	0.000523705	0.00632937	2.56196	0.738673	4.85399	5.45652	1.43021	1.02517	0.0288681	1.02517	ENSG00000142089	IFITM3	12.9612	GO:0035455	response to interferon-alpha	Any process that results in a change in state or activity of a cell or an organism (in terms of movement, secretion, enzyme production, gene expression, etc.) as a result of an interferon-alpha stimulus. Interferon-alpha is a type I interferon. [GOC:sl, PMID:11356686]	interferon induced transmembrane protein 3	negative regulation of viral entry into host cell
ENST00000548747	PMEL	1.13469e-05	0.000238975	2.56053	0.583295	1.71979	3.22545	0.386093	1.14495	0.613529	1.14495	ENSG00000185664	PMEL	12.9427	GO:0032438	melanosome organization	A process that is carried out at the cellular level which results in the assembly, arrangement of constituent parts, or disassembly of a melanosome. A melanosome is a tissue-specific, membrane-bounded cytoplasmic organelle within which melanin pigments are synthesized and stored. [GOC:vk]	premelanosome protein
ENST00000452355	SRSF2	1.35078e-06	3.63213e-05	2.55938	0.529658	1.30436	2.91694	0.433289	0.373561	0.829131	0.829131	ENSG00000161547	SRSF2	12.9278	GO:0006369	termination of RNA polymerase II transcription	The process in which the synthesis of an RNA molecule by RNA polymerase II using a DNA template is completed. [GOC:mah, GOC:txnOH]	serine/arginine-rich splicing factor 2
ENST00000379727	CYP1A1	0.000122846	0.00185378	2.55901	0.666342	3.07434	3.55482	0.510588	1.48747	0.186514	1.48747	ENSG00000140465	CYP1A1	12.923	GO:0097267	omega-hydroxylase P450 pathway	The chemical reactions and pathways by which arachidonic acid is converted to other compounds initially by omega-hydroxylation. [GOC:mw, PMID:10681399]	cytochrome P450 family 1 subfamily A member 1
ENST00000483067	SP110	6.15828e-08	2.28164e-06	2.55871	0.472597	1.53953	2.05068	0.303557	0.0391078	0.701511	0.701511	ENSG00000135899	SP110	12.9191	GO:0016032	viral process	A multi-organism process in which a virus is a participant. The other participant is the host. Includes infection of a host cell, replication of the viral genome, and assembly of progeny virus particles. In some cases the viral genetic material may integrate into the host genome and only subsequently, under particular circumstances, 'complete' its life cycle. [GOC:bf, GOC:jl, GOC:mah]	SP110 nuclear body protein	Hepatic veno-occlusive disease - immunodeficiency
ENST00000587311	LGALS3BP	0.000979595	0.0106596	2.55538	0.77522	5.06004	8.6986	1.47952	1.22483	0.0256597	1.22483	ENSG00000108679	LGALS3BP	12.8761	GO:0006898	receptor-mediated endocytosis	An endocytosis process in which cell surface receptors ensure specificity of transport. A specific receptor on the cell surface binds tightly to the extracellular macromolecule (the ligand) that it recognizes; the plasma-membrane region containing the receptor-ligand complex then undergoes endocytosis, forming a transport vesicle containing the receptor-ligand complex and excluding most other pla…	lectin, galactoside-binding, soluble, 3 binding protein
ENST00000413643	DBF4	8.62349e-05	0.0013713	2.55492	0.650707	2.32928	4.13872	1.53101	-0.0877725	0.374375	0.374375	ENSG00000006634	DBF4	12.8703	GO:0000082	G1/S transition of mitotic cell cycle	The mitotic cell cycle transition by which a cell in G1 commits to S phase. The process begins with the build up of G1 cyclin-dependent kinase (G1 CDK), resulting in the activation of transcription of G1 cyclins. The process ends with the positive feedback of the G1 cyclins on the G1 CDK which commits the cell to S phase, in which DNA replication is initiated. [GOC:mtg_cell_cycle]	DBF4 zinc finger
ENST00000505863	DDX60L	0.00426042	0.0346832	2.55027	0.892263	2.59372	4.92808	1.45023	2.13237	0.295961	2.13237	ENSG00000181381	DDX60L	12.8106	GO:0004386	helicase activity	Catalysis of the reaction: NTP + H2O = NDP + phosphate, to drive the unwinding of a DNA or RNA helix. [GOC:mah, ISBN:0198506732]	DEAD (Asp-Glu-Ala-Asp) box polypeptide 60-like
ENST00000295903	ADAMTS9	9.75441e-05	0.00152235	2.54661	0.653543	4.46029	4.63012	0.852788	1.06924	0.0399569	1.06924	ENSG00000163638	ADAMTS9	12.7637	GO:0006516	glycoprotein catabolic process	The chemical reactions and pathways resulting in the breakdown of glycoproteins, any protein that contains covalently bound glycose (i.e. monosaccharide) residues; the glycose occurs most commonly as oligosaccharide or fairly small polysaccharide but occasionally as monosaccharide. [GOC:go_curators, ISBN:0198506732]	ADAM metallopeptidase with thrombospondin type 1 motif 9
ENST00000255695	HRASLS2	4.05287e-12	3.20224e-10	2.54587	0.367088	2.29507	2.74274	0.220918	-0.0344706	0.385472	0.385472	ENSG00000133328	HRASLS2	12.7543	GO:0016746	transferase activity, transferring acyl groups	Catalysis of the transfer of an acyl group from one compound (donor) to another (acceptor). [GOC:jl, ISBN:0198506732]	HRAS-like suppressor 2
ENST00000355522	C2CD4A	7.78651e-20	1.48459e-17	2.54301	0.278958	3.72298	2.29649	0.0820441	0.268135	0.086446	0.268135	ENSG00000198535	C2CD4A	12.7179	GO:0005515	protein binding	Interacting selectively and non-covalently with any protein or protein complex (a complex of two or more proteins that may include other nonprotein molecules). [GOC:go_curators]	C2 calcium-dependent domain containing 4A
ENST00000515115	PDZD2	3.3939e-06	8.24172e-05	2.54144	0.547086	1.30453	2.22876	0.51783	-0.0380533	0.829035	0.829035	ENSG00000133401	PDZD2	12.698	GO:0005515	protein binding	Interacting selectively and non-covalently with any protein or protein complex (a complex of two or more proteins that may include other nonprotein molecules). [GOC:go_curators]	PDZ domain containing 2
ENST00000373927	THEMIS2	4.63084e-10	2.60418e-08	2.54141	0.407857	3.53707	3.01289	0.640853	-0.0257114	0.10771	0.10771	ENSG00000130775	THEMIS2	12.6975	GO:0005515	protein binding	Interacting selectively and non-covalently with any protein or protein complex (a complex of two or more proteins that may include other nonprotein molecules). [GOC:go_curators]	thymocyte selection associated family member 2
ENST00000379792	HERPUD1	0.00333423	0.0285721	2.54048	0.865548	3.59415	5.75775	2.226	1.14528	0.100485	1.14528	ENSG00000051108	HERPUD1	12.6858	GO:1990037	Lewy body core	The center portion of a Lewy body. In Parkinson's disease, it contains a matted meshwork of filaments. [NIF_Subcellular:sao6587439252]	homocysteine-inducible, endoplasmic reticulum stress-inducible, ubiquitin-like domain member 1	positive regulation of ER-associated ubiquitin-dependent protein catabolic process
ENST00000600588	RPL7P50	3.34601e-07	1.04226e-05	2.53949	0.497662	1.16001	2.16175	0.19925	0.140033	0.915254	0.915254	ENSG00000268785	RPL7P50	12.6732
ENST00000550863	CPNE8	1.15789e-08	5.11044e-07	2.5368	0.4446	1.67793	2.56884	0.256276	0.408747	0.633234	0.633234	ENSG00000139117	CPNE8	12.6392	GO:0070062	extracellular exosome	A membrane-bounded vesicle that is released into the extracellular region by fusion of the limiting endosomal membrane of a multivesicular body with the plasma membrane. Extracellular exosomes, also simply called exosomes, have a diameter of about 40-100 nm. [GOC:BHF, GOC:mah, PMID:15908444, PMID:17641064, PMID:19442504, PMID:19498381, PMID:22418571, PMID:24009894]	copine VIII
ENST00000587757	LDLRAD4	2.2125e-07	7.24981e-06	2.53527	0.489384	1.48034	2.78004	0.345521	0.694224	0.732215	0.732215	ENSG00000168675	LDLRAD4	12.6199	GO:0005515	protein binding	Interacting selectively and non-covalently with any protein or protein complex (a complex of two or more proteins that may include other nonprotein molecules). [GOC:go_curators]	low density lipoprotein receptor class A domain containing 4	negative regulation of cell migration
ENST00000395097	NR4A3	2.08348e-06	5.33689e-05	2.53511	0.534253	2.54506	3.92796	0.467164	0.817254	0.309389	0.817254	ENSG00000119508	NR4A3	12.6178	GO:2000253	positive regulation of feeding behavior	Any process that activates or increases the frequency, rate or extent of feeding behavior. [GOC:obol]	nuclear receptor subfamily 4 group A member 3	Extraskeletal myxoid chondrosarcoma
ENST00000236877	SLC8A2	9.39566e-13	8.12784e-11	2.53498	0.355085	3.05696	2.61484	0.377416	-0.0867793	0.189968	0.189968	ENSG00000118160	SLC8A2	12.6162	GO:0007613	memory	The activities involved in the mental information processing system that receives (registers), modifies, stores, and retrieves informational stimuli. The main stages involved in the formation and retrieval of memory are encoding (processing of received information by acquisition), storage (building a permanent record of received information as a result of consolidation) and retrieval (calling bac…	solute carrier family 8 (sodium/calcium exchanger), member 2
ENST00000360356	PARP9	4.80767e-08	1.8296e-06	2.53068	0.46364	5.94361	2.65748	0.949346	-0.696121	0.0179842	0.0179842	ENSG00000138496	PARP9	12.562	GO:0060330	regulation of response to interferon-gamma	Any process that modulates the rate, frequency or extent of a response to interferon-gamma. Response to interferon gamma is a change in state or activity of a cell or an organism (in terms of movement, secretion, enzyme production, gene expression, etc.) as a result of an interferon-gamma stimulus. [GOC:dph]	poly(ADP-ribose) polymerase family member 9	double-strand break repair
ENST00000302071	SESN1	0.00425958	0.03468	2.5302	0.885222	2.44767	4.11051	3.18865	-0.534791	0.337631	0.337631	ENSG00000080546	SESN1	12.5561	GO:1901031	regulation of response to reactive oxygen species	Any process that modulates the frequency, rate or extent of response to reactive oxygen species. [GOC:kmv, GOC:TermGenie]	sestrin 1
ENST00000614035	TNFAIP3	0.00130038	0.0134265	2.5297	0.786623	2.08797	4.69389	2.21415	0.570341	0.45829	0.570341	ENSG00000118503	TNFAIP3	12.5497				TNF alpha induced protein 3	negative regulation of CD40 signaling pathway
ENST00000525159	TOLLIP	0.000874291	0.00966258	2.52911	0.759917	1.43251	4.00501	1.29788	1.30076	0.757712	1.30076	ENSG00000078902	TOLLIP	12.5423	GO:0045092	interleukin-18 receptor complex	A protein complex that binds interleukin-18; comprises an alpha and a beta subunit. [GOC:mah, PMID:12759435]	toll interacting protein
ENST00000477922	MGAM2	4.90755e-08	1.86386e-06	2.52624	0.463137	2.10736	2.82663	0.117042	0.848187	0.451032	0.848187	ENSG00000257743	MGAM2	12.5064	GO:0004339	glucan 1,4-alpha-glucosidase activity	Catalysis of the hydrolysis of terminal (1->4)-linked alpha-D-glucose residues successively from non-reducing ends of the chains with release of beta-D-glucose. [EC:3.2.1.3]	maltase-glucoamylase 2 (putative)
ENST00000567791	RRAD	2.1809e-07	7.16488e-06	2.52432	0.487019	1.41445	2.45705	0.299842	0.547287	0.7675	0.7675	ENSG00000166592	RRAD	12.4825	GO:0005515	protein binding	Interacting selectively and non-covalently with any protein or protein complex (a complex of two or more proteins that may include other nonprotein molecules). [GOC:go_curators]	Ras-related associated with diabetes
ENST00000493262	PARP12	2.80214e-10	1.63845e-08	2.52378	0.400007	2.23472	2.468	0.314402	0.14579	0.405624	0.405624	ENSG00000059378	PARP12	12.4757	GO:0044822	poly(A) RNA binding	Interacting non-covalently with a poly(A) RNA, a RNA molecule which has a tail of adenine bases. [GOC:jl]	poly(ADP-ribose) polymerase family member 12
ENST00000525246	TDH	7.84367e-07	2.23284e-05	2.52097	0.5104	1.68724	2.73039	0.543469	0.39225	0.628816	0.628816	ENSG00000154316	TDH	12.4407
ENST00000448787	PLSCR1	1.86477e-25	5.32641e-23	2.51958	0.241637	5.67933	2.53875	0.242611	-0.0348597	0.0201372	0.0201372	ENSG00000188313	PLSCR1	12.4233	GO:2000373	positive regulation of DNA topoisomerase (ATP-hydrolyzing) activity	Any process that activates or increases the frequency, rate or extent of DNA topoisomerase (ATP-hydrolyzing) activity. [GOC:mah]	phospholipid scramblase 1	defense response to virus
ENST00000595618	MYO9B	0.00150124	0.0151168	2.51869	0.793429	4.68385	4.46927	2.80014	0.0300553	0.0327401	0.0327401	ENSG00000099331	MYO9B	12.4124	GO:0000146	microfilament motor activity	Catalysis of movement along a microfilament, coupled to the hydrolysis of a nucleoside triphosphate (usually ATP). [GOC:mah, ISBN:0815316194]	myosin IXB
ENST00000503467	LAP3	4.7103e-13	4.2094e-11	2.51774	0.348071	3.8608	1.91152	0.470722	-0.214021	0.0744672	0.0744672	ENSG00000002549	LAP3	12.4005	GO:0008235	metalloexopeptidase activity	Catalysis of the hydrolysis of a peptide bond not more than three residues from the N- or C-terminus of a polypeptide chain by a mechanism in which water acts as a nucleophile, one or two metal ions hold the water molecule in place, and charged amino acid side chains are ligands for the metal ions. [GOC:mah, http://merops.sanger.ac.uk/about/glossary.htm#CATTYPE, http://merops.sanger.ac.uk/about/g…	leucine aminopeptidase 3
ENST00000535259	GRIN2A	0.000335888	0.00433789	2.51765	0.702092	1.6828	3.56157	1.58728	0.346438	0.630919	0.630919	ENSG00000183454	GRIN2A	12.3994	GO:0045471	response to ethanol	Any process that results in a change in state or activity of a cell or an organism (in terms of movement, secretion, enzyme production, gene expression, etc.) as a result of an ethanol stimulus. [GOC:go_curators]	glutamate receptor, ionotropic, N-methyl D-aspartate 2A	Continuous spikes and waves during sleep
ENST00000540115	ACSL3	7.76787e-07	2.21626e-05	2.51542	0.509079	1.44106	2.70943	0.413115	0.746869	0.753112	0.753112	ENSG00000123983	ACSL3	12.3718	GO:2001247	positive regulation of phosphatidylcholine biosynthetic process	Any process that activates or increases the frequency, rate or extent of phosphatidylcholine biosynthetic process. [GOC:obol]	acyl-CoA synthetase long-chain family member 3	very long-chain fatty acid metabolic process
ENST00000525750	IRF7	5.92474e-07	1.73419e-05	2.51389	0.503417	1.36026	2.24604	0.343014	0.235315	0.797414	0.797414	ENSG00000185507	IRF7	12.3529	GO:0005515	protein binding	Interacting selectively and non-covalently with any protein or protein complex (a complex of two or more proteins that may include other nonprotein molecules). [GOC:go_curators]	interferon regulatory factor 7	DNA binding
ENST00000342380	ASTL	3.30005e-08	1.3078e-06	2.51328	0.454916	1.46229	2.05987	0.189504	0.200803	0.741764	0.741764	ENSG00000188886	ASTL	12.3454	GO:0070002	glutamic-type peptidase activity	Catalysis of the hydrolysis of peptide bonds in a polypeptide chain by a mechanism involving a glutamate/glutamine catalytic dyad. [GOC:mah, http://merops.sanger.ac.uk/about/glossary.htm#CATTYPE]	astacin-like metallo-endopeptidase (M12 family)
ENST00000315588	MED29	0.0061008	0.0459125	2.51296	0.916364	4.0367	5.11465	1.56102	2.21773	0.0616482	2.21773	ENSG00000063322	MED29	12.3414				mediator complex subunit 29
ENST00000556330	SRSF5	3.23306e-06	7.8993e-05	2.51086	0.53934	2.46269	2.82647	0.331147	0.977848	0.333158	0.977848	ENSG00000100650	SRSF5	12.3155	GO:0006369	termination of RNA polymerase II transcription	The process in which the synthesis of an RNA molecule by RNA polymerase II using a DNA template is completed. [GOC:mah, GOC:txnOH]	serine/arginine-rich splicing factor 5
ENST00000436863	CASP1	0.00566972	0.0433624	2.50959	0.907202	2.57434	8.19063	1.70432	1.99924	0.301254	1.99924	ENSG00000137752	CASP1	12.2999	GO:0008234	cysteine-type peptidase activity	Catalysis of the hydrolysis of peptide bonds in a polypeptide chain by a mechanism in which the sulfhydryl group of a cysteine residue at the active center acts as a nucleophile. [GOC:mah, http://merops.sanger.ac.uk/about/glossary.htm#CATTYPE]	caspase 1
ENST00000504902	HSPA9	0.000538929	0.00648437	2.5089	0.724986	1.13989	2.53648	1.43747	-0.498633	0.927754	0.927754	ENSG00000113013	HSPA9	12.2914	GO:0042645	mitochondrial nucleoid	The region of a mitochondrion to which the DNA is confined. [GOC:jl]	heat shock protein family A (Hsp70) member 9
ENST00000514949	SNX2	7.4212e-07	2.1259e-05	2.50764	0.506593	2.9179	2.84015	0.431256	0.723609	0.218053	0.723609	ENSG00000205302	SNX2	12.2759	GO:1990460	leptin receptor binding	Interacting selectively and non-covalently with the leptin receptor. [GOC:pm, PMID:22405007]	sorting nexin 2	retrograde transport endosome to Golgi
ENST00000469280	NCF2	4.56097e-07	1.37653e-05	2.50657	0.496949	1.09762	2.47889	0.15688	0.697737	0.954433	0.954433	ENSG00000116701	NCF2	12.2628	GO:0032010	phagolysosome	A membrane-bounded intracellular vesicle formed by maturation of an early phagosome following the ingestion of particulate material by phagocytosis; during maturation, phagosomes acquire markers of late endosomes and lysosomes. [GOC:mah, PMID:12388753]	neutrophil cytosolic factor 2	Chronic granulomatous disease
ENST00000459917	MFSD2A	1.94213e-09	9.85291e-08	2.50311	0.417007	2.13958	2.36457	0.327792	0.454734	0.439171	0.454734	ENSG00000168389	MFSD2A	12.2205	GO:1990379	lipid transport across blood brain barrier	The directed movement of lipid molecules passing through the blood-brain barrier. [GOC:sjp, PMID:24345162]	major facilitator superfamily domain containing 2A	Autosomal recessive primary microcephaly
ENST00000543567	TAPBPL	0.000207198	0.00289362	2.49853	0.673444	2.66958	3.2084	1.76494	-0.0100325	0.275935	0.275935	ENSG00000139192	TAPBPL	12.1646				TAP binding protein-like
ENST00000544382	CLPB	0.00102302	0.0110449	2.49736	0.760435	1.66035	3.99825	1.29121	1.31097	0.64164	1.31097	ENSG00000162129	CLPB	12.1504	GO:0034605	cellular response to heat	Any process that results in a change in state or activity of a cell (in terms of movement, secretion, enzyme production, gene expression, etc.) as a result of a heat stimulus, a temperature stimulus above the optimal temperature for that organism. [GOC:mah]	ClpB homolog, mitochondrial AAA ATPase chaperonin	3-Methylglutaconic aciduria type vii with cataracts neurologic involvement and neutropenia
ENST00000308611	CD200R1	4.05453e-06	9.61767e-05	2.4928	0.540906	1.59909	2.10481	0.645078	-0.316184	0.67153	0.67153	ENSG00000163606	CD200R1	12.0951	GO:0016032	viral process	A multi-organism process in which a virus is a participant. The other participant is the host. Includes infection of a host cell, replication of the viral genome, and assembly of progeny virus particles. In some cases the viral genetic material may integrate into the host genome and only subsequently, under particular circumstances, 'complete' its life cycle. [GOC:bf, GOC:jl, GOC:mah]	CD200 receptor 1
ENST00000556097	LGMN	0.000239544	0.00326935	2.4925	0.678566	2.14524	3.50725	0.71273	1.3593	0.437112	1.3593	ENSG00000100600	LGMN	12.0914	GO:1901185	negative regulation of ERBB signaling pathway	Any process that stops, prevents or reduces the frequency, rate or extent of ERBB signaling pathway. [GOC:BHF, GOC:TermGenie]	legumain
ENST00000515654	MAP9	2.74675e-05	0.000510834	2.4897	0.593704	2.55269	3.01584	1.27892	0.205047	0.307254	0.307254	ENSG00000164114	MAP9	12.0577	GO:0000910	cytokinesis	The division of the cytoplasm and the plasma membrane of a cell and its partitioning into two daughter cells. [GOC:mtg_cell_cycle]	microtubule associated protein 9
ENST00000242315	PHF24	5.37821e-19	9.62395e-17	2.48672	0.279276	3.50361	2.08106	0.162672	0.188306	0.112231	0.188306	ENSG00000122733	PHF24	12.0218	GO:0005509	calcium ion binding	Interacting selectively and non-covalently with calcium ions (Ca2+). [GOC:ai]	PHD finger protein 24
ENST00000521182	LY6E	9.40288e-06	0.000202657	2.48518	0.560929	2.43255	3.11919	1.07371	0.0966602	0.342176	0.342176	ENSG00000160932	LY6E	12.0033				lymphocyte antigen 6 complex, locus E
ENST00000581193	MYL12B	1.80614e-07	6.06262e-06	2.48505	0.476222	2.54891	3.43917	0.278922	0.741622	0.308311	0.741622	ENSG00000118680	MYL12B	12.0017	GO:0006936	muscle contraction	A process in which force is generated within muscle tissue, resulting in a change in muscle geometry. Force generation involves a chemo-mechanical energy conversion step that is carried out by the actin/myosin complex activity, which generates force through ATP hydrolysis. [GOC:ef, GOC:mtg_muscle, ISBN:0198506732]	myosin light chain 12B
ENST00000549985	ELK3	0.000613747	0.00719918	2.4845	0.725303	2.25678	3.78684	0.963902	1.40339	0.398156	1.40339	ENSG00000111145	ELK3	11.9951	GO:0032422	purine-rich negative regulatory element binding	Interacting selectively and non-covalently with a 30-bp purine-rich negative regulatory element; the best characterized such element is found in the first intronic region of the rat cardiac alpha-myosin heavy chain gene, and contains two palindromic high-affinity Ets-binding sites (CTTCCCTGGAAG). The presence of this element restricts expression of the gene containing it to cardiac myocytes. [GOC…	ELK3, ETS-domain protein (SRF accessory protein 2)
ENST00000557135	WARS	0.00128146	0.0132728	2.48367	0.771303	6.65825	4.46783	0.269177	2.40791	0.014634	2.40791	ENSG00000140105	WARS	11.9852	GO:0006436	tryptophanyl-tRNA aminoacylation	The process of coupling tryptophan to tryptophanyl-tRNA, catalyzed by tryptophanyl-tRNA synthetase. In tRNA aminoacylation, the amino acid is first activated by linkage to AMP and then transferred to either the 2'- or the 3'-hydroxyl group of the 3'-adenosine residue of the tRNA. [GOC:mcc, ISBN:0716730510]	tryptophanyl-tRNA synthetase
ENST00000528911	MVB12A	0.00010155	0.00157707	2.48365	0.638986	3.10942	4.74221	0.494479	1.34288	0.179594	1.34288	ENSG00000141971	MVB12A	11.9849	GO:0005654	nucleoplasm	That part of the nuclear content other than the chromosomes or the nucleolus. [GOC:ma, ISBN:0124325653]	multivesicular body subunit 12A	calcium-dependent phospholipid binding
ENST00000377918	PCDH17	3.8234e-35	1.98222e-32	2.48323	0.200755	4.28992	1.82357	0.0567181	0.124643	0.0472803	0.124643	ENSG00000118946	PCDH17	11.9799	GO:0005515	protein binding	Interacting selectively and non-covalently with any protein or protein complex (a complex of two or more proteins that may include other nonprotein molecules). [GOC:go_curators]	protocadherin 17
ENST00000474669	PARP14	2.69542e-73	6.80082e-70	2.48316	0.137121	5.03771	1.72887	0.0568611	0.0277492	0.0259493	0.0277492	ENSG00000173193	PARP14	11.9791	GO:0016020	membrane	A lipid bilayer along with all the proteins and protein complexes embedded in it an attached to it. [GOC:dos, GOC:mah, ISBN:0815316194]	poly(ADP-ribose) polymerase family member 14
ENST00000333486	UBA7	2.41911e-23	6.10367e-21	2.48255	0.249399	6.87589	1.93709	0.00329675	0.276603	0.0140152	0.276603	ENSG00000182179	UBA7	11.9718	GO:0019782	ISG15 activating enzyme activity	Catalysis of the activation of the small ubiquitin-related modifier ISG15, through the formation of an ATP-dependent high-energy thiolester bond. [GOC:mah]	ubiquitin-like modifier activating enzyme 7
ENST00000559627	PTGS2	2.86742e-06	7.10687e-05	2.47807	0.529491	2.80612	2.89369	0.587872	0.673751	0.242671	0.673751	ENSG00000073756	PTGS2	11.9182	GO:0090362	positive regulation of platelet-derived growth factor production	Any process that increases the rate, frequency, or extent of the appearance of any platelet-derived growth factor due to biosynthesis or secretion following a cellular stimulus, resulting in an increase in its intracellular or extracellular levels. [GOC:BHF]	prostaglandin-endoperoxide synthase 2 (prostaglandin G/H synthase and cyclooxygenase)
ENST00000439603	LONRF3	4.04796e-06	9.60508e-05	2.47477	0.536955	1.69116	2.42738	0.670482	0.227801	0.626961	0.626961	ENSG00000175556	LONRF3	11.879	GO:0004176	ATP-dependent peptidase activity	Catalysis of the reaction: ATP + H2O = ADP + phosphate, to drive the hydrolysis of peptide bonds. [GOC:mah]	LON peptidase N-terminal domain and ring finger 3
ENST00000419590	HLA-C	0.000224721	0.00309719	2.47379	0.6705	0.8687	2.61305	0.914082	0.184252	1.10899	1.10899	ENSG00000237022	HLA-C	11.8674	GO:0019882	antigen processing and presentation	The process in which an antigen-presenting cell expresses antigen (peptide or lipid) on its cell surface in association with an MHC protein complex. [GO_REF:0000022, GOC:add, GOC:mtg_15nov05, ISBN:0781735149, PMID:15771591, PMID:15928678]	major histocompatibility complex, class I, C	PSORIASIS 1 SUSCEPTIBILITY TO
ENST00000465155	ATF3	6.2354e-20	1.2071e-17	2.47171	0.270422	4.56819	1.91278	0.0437828	0.285294	0.0361612	0.285294	ENSG00000162772	ATF3	11.8426	GO:0043565	sequence-specific DNA binding	Interacting selectively and non-covalently with DNA of a specific nucleotide composition, e.g. GC-rich DNA binding, or with a specific sequence motif or type of DNA e.g. promotor binding or rDNA binding. [GOC:jl]	activating transcription factor 3	positive regulation of TRAIL-activated apoptotic signaling pathway
ENST00000489826	UBA7	3.67055e-07	1.13454e-05	2.47156	0.486022	3.01641	2.68398	0.39504	0.667936	0.198068	0.667936	ENSG00000182179	UBA7	11.8409	GO:0019782	ISG15 activating enzyme activity	Catalysis of the activation of the small ubiquitin-related modifier ISG15, through the formation of an ATP-dependent high-energy thiolester bond. [GOC:mah]	ubiquitin-like modifier activating enzyme 7
ENST00000558996	DUOXA1	4.87382e-06	0.000113407	2.47081	0.540642	0.972853	1.97132	0.278822	0.116825	1.0365	1.0365	ENSG00000140254	DUOXA1	11.8321	GO:0005789	endoplasmic reticulum membrane	The lipid bilayer surrounding the endoplasmic reticulum. [GOC:mah]	dual oxidase maturation factor 1
ENST00000366983	ATF3	8.67084e-16	1.10865e-13	2.47017	0.30707	3.80174	1.99397	0.204286	0.220026	0.079347	0.220026	ENSG00000162772	ATF3	11.8245	GO:0043565	sequence-specific DNA binding	Interacting selectively and non-covalently with DNA of a specific nucleotide composition, e.g. GC-rich DNA binding, or with a specific sequence motif or type of DNA e.g. promotor binding or rDNA binding. [GOC:jl]	activating transcription factor 3	positive regulation of TRAIL-activated apoptotic signaling pathway
ENST00000373925	THEMIS2	2.40795e-06	6.07348e-05	2.46995	0.523764	3.24163	2.64402	1.07998	-0.251722	0.1545	0.1545	ENSG00000130775	THEMIS2	11.8219	GO:0005515	protein binding	Interacting selectively and non-covalently with any protein or protein complex (a complex of two or more proteins that may include other nonprotein molecules). [GOC:go_curators]	thymocyte selection associated family member 2
ENST00000468609	TAP1	1.89494e-10	1.14199e-08	2.4694	0.387685	1.709	1.7462	0.057779	0.0190387	0.618568	0.618568	ENSG00000232367	TAP1	11.8154	GO:0046967	cytosol to ER transport	The directed movement of substances from the cytosol to the endoplasmic reticulum of a cell. [GOC:ai]	transporter 1, ATP-binding cassette, sub-family B (MDR/TAP)	ATP binding
ENST00000469192	TAP1	1.89494e-10	1.14199e-08	2.4694	0.387685	1.709	1.7462	0.057779	0.0190387	0.618568	0.618568	ENSG00000224212	TAP1	11.8154	GO:0046967	cytosol to ER transport	The directed movement of substances from the cytosol to the endoplasmic reticulum of a cell. [GOC:ai]	transporter 1, ATP-binding cassette, sub-family B (MDR/TAP)	ATP binding
ENST00000470021	TAP1	1.89494e-10	1.14199e-08	2.4694	0.387685	1.709	1.7462	0.057779	0.0190387	0.618568	0.618568	ENSG00000224748	TAP1	11.8154	GO:0015197	peptide transporter activity	Enables the directed movement of peptides, compounds of two or more amino acids where the alpha carboxyl group of one is bound to the alpha amino group of another, into, out of or within a cell, or between cells. [GOC:ai]	transporter 1, ATP-binding cassette, sub-family B (MDR/TAP)	BARE LYMPHOCYTE SYNDROME TYPE II COMPLEMENTATION GROUP D
ENST00000481178	TAP1	1.89494e-10	1.14199e-08	2.4694	0.387685	1.709	1.7462	0.057779	0.0190387	0.618568	0.618568	ENSG00000230705	TAP1	11.8154	GO:0046967	cytosol to ER transport	The directed movement of substances from the cytosol to the endoplasmic reticulum of a cell. [GOC:ai]	transporter 1, ATP-binding cassette, sub-family B (MDR/TAP)	ATP binding
ENST00000486849	TAP1	1.89494e-10	1.14199e-08	2.4694	0.387685	1.709	1.7462	0.057779	0.0190387	0.618568	0.618568	ENSG00000226173	TAP1	11.8154	GO:0046967	cytosol to ER transport	The directed movement of substances from the cytosol to the endoplasmic reticulum of a cell. [GOC:ai]	transporter 1, ATP-binding cassette, sub-family B (MDR/TAP)	ATP binding
ENST00000487296	TAP1	1.89494e-10	1.14199e-08	2.4694	0.387685	1.709	1.7462	0.057779	0.0190387	0.618568	0.618568	ENSG00000168394	TAP1	11.8154	GO:0046967	cytosol to ER transport	The directed movement of substances from the cytosol to the endoplasmic reticulum of a cell. [GOC:ai]	transporter 1, ATP-binding cassette, sub-family B (MDR/TAP)	Immunodeficiency by defective expression of HLA class 1
ENST00000490601	TAP1	1.89494e-10	1.14199e-08	2.4694	0.387685	1.709	1.7462	0.057779	0.0190387	0.618568	0.618568	ENSG00000206297	TAP1	11.8154	GO:0046967	cytosol to ER transport	The directed movement of substances from the cytosol to the endoplasmic reticulum of a cell. [GOC:ai]	transporter 1, ATP-binding cassette, sub-family B (MDR/TAP)	ATP binding
ENST00000494196	TAP1	1.89494e-10	1.14199e-08	2.4694	0.387685	1.709	1.7462	0.057779	0.0190387	0.618568	0.618568	ENSG00000227816	TAP1	11.8154	GO:0046967	cytosol to ER transport	The directed movement of substances from the cytosol to the endoplasmic reticulum of a cell. [GOC:ai]	transporter 1, ATP-binding cassette, sub-family B (MDR/TAP)	ATP binding
ENST00000366987	ATF3	1.35118e-37	7.74812e-35	2.46884	0.192653	7.05255	1.79764	0.0327006	0.134317	0.0135435	0.134317	ENSG00000162772	ATF3	11.8088	GO:0043565	sequence-specific DNA binding	Interacting selectively and non-covalently with DNA of a specific nucleotide composition, e.g. GC-rich DNA binding, or with a specific sequence motif or type of DNA e.g. promotor binding or rDNA binding. [GOC:jl]	activating transcription factor 3	positive regulation of TRAIL-activated apoptotic signaling pathway
ENST00000530538	IL32	6.15687e-05	0.00102831	2.46569	0.61539	3.21043	3.02374	1.54393	-0.584067	0.160245	0.160245	ENSG00000008517	IL32	11.7716	GO:0006952	defense response	Reactions, triggered in response to the presence of a foreign body or the occurrence of an injury, which result in restriction of damage to the organism attacked or prevention/recovery from the infection caused by the attack. [GOC:go_curators]	interleukin 32
ENST00000311069	PCP2	1.66159e-06	4.37007e-05	2.46498	0.514529	1.09517	1.95327	0.235333	0.14494	0.955996	0.955996	ENSG00000174788	PCP2	11.7632	GO:0030695	GTPase regulator activity	Modulates the rate of GTP hydrolysis by a GTPase. [GOC:mah]	Purkinje cell protein 2
ENST00000444921	GRM8	3.71022e-06	8.89854e-05	2.46466	0.53267	1.31105	2.16603	0.451534	0.172469	0.825286	0.825286	ENSG00000179603	GRM8	11.7595	GO:0030818	negative regulation of cAMP biosynthetic process	Any process that stops, prevents, or reduces the frequency, rate or extent of the chemical reactions and pathways resulting in the formation of the nucleotide cAMP (cyclic AMP, adenosine 3',5'-cyclophosphate). [GOC:mah]	glutamate receptor, metabotropic 8	G-protein coupled receptor activity
ENST00000486949	NAMPT	2.25692e-14	2.43005e-12	2.46307	0.322599	2.98699	1.78082	0.264353	-0.145629	0.203962	0.203962	ENSG00000105835	NAMPT	11.7407	GO:0047280	nicotinamide phosphoribosyltransferase activity	Catalysis of the reaction: diphosphate + nicotinamide mononucleotide = 5-phospho-alpha-D-ribose 1-diphosphate + H(+) + nicotinamide. [EC:2.4.2.12, RHEA:16152]	nicotinamide phosphoribosyltransferase
ENST00000554056	PNP	0.00023707	0.00324025	2.46305	0.670064	2.47864	3.31087	1.69198	0.20561	0.328454	0.328454	ENSG00000198805	PNP	11.7405	GO:0009116	nucleoside metabolic process	The chemical reactions and pathways involving a nucleoside, a nucleobase linked to either beta-D-ribofuranose (a ribonucleoside) or 2-deoxy-beta-D-ribofuranose, (a deoxyribonucleoside), e.g. adenosine, guanosine, inosine, cytidine, uridine and deoxyadenosine, deoxyguanosine, deoxycytidine and thymidine (= deoxythymidine). [GOC:ma]	purine nucleoside phosphorylase	PURINE NUCLEOSIDE PHOSPHORYLASE DEFICIENCY
ENST00000528413	IRF7	2.42174e-06	6.09606e-05	2.46203	0.522213	2.69982	2.52237	0.95892	-0.0127824	0.268261	0.268261	ENSG00000185507	IRF7	11.7286	GO:0005515	protein binding	Interacting selectively and non-covalently with any protein or protein complex (a complex of two or more proteins that may include other nonprotein molecules). [GOC:go_curators]	interferon regulatory factor 7	DNA binding
ENST00000513189	TLR3	3.77626e-23	9.46479e-21	2.45883	0.248122	4.13	1.90914	0.139182	0.137859	0.0558275	0.137859	ENSG00000164342	TLR3	11.6911	GO:0097527	necroptotic signaling pathway	A series of molecular signals which triggers the necroptotic death of a cell. The pathway starts with reception of a signal, is characterized by activation of receptor-interacting serine/threonine-protein kinase 1 and/or 3 (RIPK1/3, also called RIP1/3), and ends when the execution phase of necroptosis is triggered. [GOC:mtg_apoptosis, PMID:20823910]	toll-like receptor 3	HERPES SIMPLEX ENCEPHALITIS SUSCEPTIBILITY TO 7 (1 patient)
ENST00000241261	TNFSF10	1.69961e-12	1.4184e-10	2.45413	0.347752	4.94468	3.92771	0.516894	-0.21487	0.0272957	0.0272957	ENSG00000121858	TNFSF10	11.6363	GO:2001238	positive regulation of extrinsic apoptotic signaling pathway	Any process that activates or increases the frequency, rate or extent of extrinsic apoptotic signaling pathway. [GOC:mtg_apoptosis]	tumor necrosis factor superfamily member 10
ENST00000535653	MYEOV	0.00154634	0.0154776	2.4536	0.775024	1.82176	4.4086	0.787077	1.9159	0.567265	1.9159	ENSG00000172927	MYEOV	11.6302				myeloma overexpressed
ENST00000425718	APOE	4.58708e-06	0.000107495	2.45228	0.5351	1.41817	2.64612	0.523018	0.667808	0.765476	0.765476	ENSG00000130203	APOE	11.6148	GO:1903002	positive regulation of lipid transport across blood brain barrier	Any process that activates or increases the frequency, rate or extent of lipid transport across blood brain barrier. [GO_REF:0000058, GOC:sjp, GOC:TermGenie, PMID:24345162]	apolipoprotein E	Hyperlipoproteinemia type 3
ENST00000476296	TTC26	0.0003979	0.00502009	2.45082	0.692034	2.50811	4.50812	1.48195	0.67315	0.319892	0.67315	ENSG00000105948	TTC26	11.5978	GO:0005515	protein binding	Interacting selectively and non-covalently with any protein or protein complex (a complex of two or more proteins that may include other nonprotein molecules). [GOC:go_curators]	tetratricopeptide repeat domain 26
ENST00000425394	PAN2	0.00213006	0.0199345	2.45048	0.797819	2.07881	5.07881	2.20083	0.663487	0.461751	0.663487	ENSG00000135473	PAN2	11.5939	GO:0000175	3'-5'-exoribonuclease activity	Catalysis of the sequential cleavage of mononucleotides from a free 3' terminus of an RNA molecule. [GOC:mah, ISBN:0198547684]	PAN2 poly(A) specific ribonuclease subunit
ENST00000439781	TAP1	0.00051097	0.00619722	2.44988	0.705015	4.96523	3.96511	0.456412	1.7803	0.0269773	1.7803	ENSG00000224212	TAP1	11.587	GO:0046967	cytosol to ER transport	The directed movement of substances from the cytosol to the endoplasmic reticulum of a cell. [GOC:ai]	transporter 1, ATP-binding cassette, sub-family B (MDR/TAP)	ATP binding
ENST00000503190	DDX60L	3.30321e-10	1.89848e-08	2.44786	0.38955	2.34508	1.96775	0.313551	0.0637221	0.369319	0.369319	ENSG00000181381	DDX60L	11.5636	GO:0004386	helicase activity	Catalysis of the reaction: NTP + H2O = NDP + phosphate, to drive the unwinding of a DNA or RNA helix. [GOC:mah, ISBN:0198506732]	DEAD (Asp-Glu-Ala-Asp) box polypeptide 60-like
ENST00000486276	PHF11	5.89156e-06	0.000134444	2.44565	0.53985	1.6561	2.65877	0.66779	0.330489	0.643682	0.643682	ENSG00000136147	PHF11	11.5381	GO:0005515	protein binding	Interacting selectively and non-covalently with any protein or protein complex (a complex of two or more proteins that may include other nonprotein molecules). [GOC:go_curators]	PHD finger protein 11	IgE RESPONSIVENESS ATOPIC
ENST00000559255	TNFAIP2	6.32617e-10	3.49523e-08	2.44531	0.395549	4.08302	2.78924	0.300467	0.403598	0.0586777	0.403598	ENSG00000185215	TNFAIP2	11.5342				TNF alpha induced protein 2
ENST00000398155	TXLNG	0.00501919	0.0394992	2.43831	0.869026	1.77604	5.59876	2.81072	0.436913	0.587706	0.587706	ENSG00000086712	TXLNG	11.4537	GO:0010564	regulation of cell cycle process	Any process that modulates a cellular process that is involved in the progression of biochemical and morphological phases and events that occur in a cell during successive cell replication or nuclear replication events. [GOC:dph, GOC:tb]	taxilin gamma	positive regulation of cell cycle process
ENST00000331849	ACSM5	1.67289e-08	7.08199e-07	2.43696	0.431869	2.80098	3.37309	0.140607	0.698692	0.243859	0.698692	ENSG00000183549	ACSM5	11.4382	GO:0047760	butyrate-CoA ligase activity	Catalysis of the reaction: ATP + an acid + CoA = AMP + diphosphate + an acyl-CoA. [EC:6.2.1.2, MetaCyc:BUTYRATE--COA-LIGASE-RXN]	acyl-CoA synthetase medium-chain family member 5
ENST00000239144	HOXB8	5.99445e-07	1.75053e-05	2.43642	0.488125	1.22419	1.83189	0.195999	0.099284	0.876197	0.876197	ENSG00000120068	HOXB8	11.4321	GO:0043565	sequence-specific DNA binding	Interacting selectively and non-covalently with DNA of a specific nucleotide composition, e.g. GC-rich DNA binding, or with a specific sequence motif or type of DNA e.g. promotor binding or rDNA binding. [GOC:jl]	homeobox B8
ENST00000612003	CD83	2.07268e-14	2.25413e-12	2.43606	0.318605	5.83288	2.4415	0.205899	0.250891	0.018859	0.250891	ENSG00000112149	CD83	11.428	GO:0001817	regulation of cytokine production	Any process that modulates the frequency, rate, or extent of production of a cytokine. [GOC:add, ISBN:0781735149]	CD83 molecule
ENST00000484800	MCM10	1.49566e-06	3.9807e-05	2.43375	0.505787	3.2356	2.82872	0.572378	0.578812	0.1556	0.578812	ENSG00000065328	MCM10	11.4016	GO:0031298	replication fork protection complex	A protein complex conserved in eukaryotes and associated with the replication fork; the complex stabilizes stalled replication forks and is thought to be involved in coordinating leading- and lagging-strand synthesis and in replication checkpoint signaling. [PMID:15367656]	minichromosome maintenance 10 replication initiation factor	cellular response to DNA damage stimulus
ENST00000475519	APOL1	6.14593e-09	2.85433e-07	2.43181	0.418359	3.09495	2.29552	0.254194	0.533415	0.182437	0.533415	ENSG00000100342	APOL1	11.3795	GO:0034361	very-low-density lipoprotein particle	A triglyceride-rich lipoprotein particle that is typically composed of APOB100, APOE and APOCs and has a density of about 1.006 g/ml and a diameter of between 20-80 nm. It is found in blood and transports endogenous products (newly synthesized cholesterol and triglycerides) from the liver. [GOC:BHF, GOC:expert_pt, GOC:mah, GOC:rl]	apolipoprotein L1	Sporadic idiopathic steroid-resistant nephrotic syndrome with focal segmental hyalinosis
ENST00000427870	PSMB9	3.19164e-05	0.000580454	2.4316	0.584613	1.98925	5.53637	0.286539	1.25143	0.496686	1.25143	ENSG00000242711	PSMB9	11.3771	GO:1990111	spermatoproteasome complex	A proteasome specifically found in mammalian testis. Contains the proteasome activator PA200 in the regulatory particle, and beta1i, beta2i, beta5i and/or alpha4s in the core (20S) subunit. Beta1i, beta2i and beta5i are inducible catalytic subunits, closely related to beta1, beta2 and beta5. Alpha4s is a sperm-specific 20S subunit, but unlike other alternative 20S subunits alpha4s lies in the out…	proteasome subunit beta 9
ENST00000434471	PSMB9	3.19164e-05	0.000580454	2.4316	0.584613	1.98925	5.53637	0.286539	1.25143	0.496686	1.25143	ENSG00000243958	PSMB9	11.3771	GO:0004175	endopeptidase activity	Catalysis of the hydrolysis of internal, alpha-peptide bonds in a polypeptide chain. [http://merops.sanger.ac.uk/about/glossary.htm#ENDOPEPTIDASE]	proteasome subunit beta 9
ENST00000453059	PSMB9	3.19164e-05	0.000580454	2.4316	0.584613	1.98925	5.53637	0.286539	1.25143	0.496686	1.25143	ENSG00000240508	PSMB9	11.3771	GO:1990111	spermatoproteasome complex	A proteasome specifically found in mammalian testis. Contains the proteasome activator PA200 in the regulatory particle, and beta1i, beta2i, beta5i and/or alpha4s in the core (20S) subunit. Beta1i, beta2i and beta5i are inducible catalytic subunits, closely related to beta1, beta2 and beta5. Alpha4s is a sperm-specific 20S subunit, but unlike other alternative 20S subunits alpha4s lies in the out…	proteasome subunit beta 9
ENST00000599899	C3	6.58206e-12	5.0072e-10	2.43112	0.354058	2.62777	1.97777	0.277272	0.187769	0.286836	0.286836	ENSG00000125730	C3	11.3716	GO:2000427	positive regulation of apoptotic cell clearance	Any process that activates or increases the frequency, rate or extent of apoptotic cell clearance. [GOC:obol]	complement component 3	Atypical hemolytic uremic syndrome with C3 anomaly
ENST00000556698	WARS	1.31674e-05	0.000272242	2.42749	0.557108	1.45143	2.6595	0.649112	0.241027	0.747551	0.747551	ENSG00000140105	WARS	11.3304	GO:0006436	tryptophanyl-tRNA aminoacylation	The process of coupling tryptophan to tryptophanyl-tRNA, catalyzed by tryptophanyl-tRNA synthetase. In tRNA aminoacylation, the amino acid is first activated by linkage to AMP and then transferred to either the 2'- or the 3'-hydroxyl group of the 3'-adenosine residue of the tRNA. [GOC:mcc, ISBN:0716730510]	tryptophanyl-tRNA synthetase
ENST00000534302	TDH	1.15673e-09	6.09722e-08	2.42521	0.398482	2.52929	3.49961	0.231106	0.483438	0.313839	0.483438	ENSG00000154316	TDH	11.3046
ENST00000557700	IFI27	2.61157e-08	1.06278e-06	2.42488	0.435686	1.66324	1.92346	0.213948	0.120337	0.640254	0.640254	ENSG00000165949	IFI27	11.3009	GO:0016021	integral component of membrane	The component of a membrane consisting of the gene products and protein complexes having at least some part of their peptide sequence embedded in the hydrophobic region of the membrane. [GOC:dos, GOC:go_curators]	interferon, alpha-inducible protein 27
ENST00000626591	IFI27	2.61157e-08	1.06278e-06	2.42488	0.435686	1.66324	1.92346	0.213948	0.120337	0.640254	0.640254	ENSG00000275214	IFI27	11.3009	GO:0016021	integral component of membrane	The component of a membrane consisting of the gene products and protein complexes having at least some part of their peptide sequence embedded in the hydrophobic region of the membrane. [GOC:dos, GOC:go_curators]	interferon, alpha-inducible protein 27
ENST00000623960	CH507-9B2.1	2.59942e-20	5.20523e-18	2.42446	0.262549	3.94539	1.85906	0.242203	-0.137268	0.0679901	0.0679901	ENSG00000277117	CH507-9B2.1	11.2961	GO:0042104	positive regulation of activated T cell proliferation	Any process that activates or increases the rate or extent of activated T cell proliferation. [GOC:jl]	ICOS ligand
ENST00000474771	KCNK2	0.000226314	0.00311518	2.42441	0.657437	1.4041	3.24703	1.17186	0.590349	0.773149	0.773149	ENSG00000082482	KCNK2	11.2956	GO:0005267	potassium channel activity	Enables the facilitated diffusion of a potassium ion (by an energy-independent process) involving passage through a transmembrane aqueous pore or channel without evidence for a carrier-mediated mechanism. [GOC:BHF, GOC:mtg_transport, GOC:pr, ISBN:0815340729]	potassium channel, two pore domain subfamily K, member 2
ENST00000525554	IFITM1	2.64439e-07	8.48863e-06	2.42421	0.470979	1.25722	2.16452	0.141617	0.0736231	0.856579	0.856579	ENSG00000185885	IFITM1	11.2933	GO:0035455	response to interferon-alpha	Any process that results in a change in state or activity of a cell or an organism (in terms of movement, secretion, enzyme production, gene expression, etc.) as a result of an interferon-alpha stimulus. Interferon-alpha is a type I interferon. [GOC:sl, PMID:11356686]	interferon induced transmembrane protein 1	negative regulation of cell migration
ENST00000617480	GOLGA4	0.0022397	0.0207528	2.42321	0.792816	1.53655	3.58773	2.12547	0.165508	0.703034	0.703034	ENSG00000144674	GOLGA4	11.282	GO:0051020	GTPase binding	Interacting selectively and non-covalently with a GTPase, any enzyme that catalyzes the hydrolysis of GTP. [GOC:ai]	golgin A4	Golgi to plasma membrane protein transport
ENST00000517371	YTHDF3	0.00506026	0.0397578	2.42315	0.864433	4.1593	4.52216	2.0958	1.2668	0.0541307	1.2668	ENSG00000185728	YTHDF3	11.2814	GO:1990247	N6-methyladenosine-containing RNA binding	Interacting selectively and non-covalently with an RNA molecule modified by N6-methyladenosine (m6A), a modification present at internal sites of mRNAs and some non-coding RNAs. [PMID:22575960, PMID:24284625]	YTH N(6)-methyladenosine RNA binding protein 3
ENST00000296795	TLR3	2.83163e-32	1.21093e-29	2.42298	0.204869	5.59602	1.85679	0.0256066	0.163265	0.020784	0.163265	ENSG00000164342	TLR3	11.2795	GO:0097527	necroptotic signaling pathway	A series of molecular signals which triggers the necroptotic death of a cell. The pathway starts with reception of a signal, is characterized by activation of receptor-interacting serine/threonine-protein kinase 1 and/or 3 (RIPK1/3, also called RIP1/3), and ends when the execution phase of necroptosis is triggered. [GOC:mtg_apoptosis, PMID:20823910]	toll-like receptor 3	HERPES SIMPLEX ENCEPHALITIS SUSCEPTIBILITY TO 7 (1 patient)
ENST00000353689	CCNB1IP1	0.000859569	0.0095303	2.42261	0.726886	3.31342	5.09165	2.05121	0.326423	0.141792	0.326423	ENSG00000100814	CCNB1IP1	11.2753	GO:0051026	chiasma assembly	The cell cycle process in which a connection between chromatids assembles, indicating where an exchange of homologous segments has taken place by the crossing-over of non-sister chromatids. [http://www.onelook.com]	cyclin B1 interacting protein 1, E3 ubiquitin protein ligase
ENST00000453839	PAPOLG	7.72335e-05	0.00124969	2.42058	0.612367	2.41233	3.20775	0.762034	0.925438	0.348326	0.925438	ENSG00000115421	PAPOLG	11.2524	GO:0006378	mRNA polyadenylation	The enzymatic addition of a sequence of 40-200 adenylyl residues at the 3' end of a eukaryotic mRNA primary transcript. [ISBN:0198506732]	poly(A) polymerase gamma
ENST00000395127	EIF2AK2	0.00220689	0.0205191	2.42056	0.790805	3.15901	4.46193	1.90954	0.904628	0.169968	0.904628	ENSG00000055332	EIF2AK2	11.2521	GO:1902036	regulation of hematopoietic stem cell differentiation	Any process that modulates the frequency, rate or extent of hematopoietic stem cell differentiation. [GOC:TermGenie, PMID:23403623]	eukaryotic translation initiation factor 2 alpha kinase 2	activation of MAPKK activity
ENST00000540242	C1R	0.00186031	0.0178855	2.41881	0.777333	2.22512	6.38505	1.35652	1.36259	0.40891	1.36259	ENSG00000159403	C1R	11.2324	GO:0070062	extracellular exosome	A membrane-bounded vesicle that is released into the extracellular region by fusion of the limiting endosomal membrane of a multivesicular body with the plasma membrane. Extracellular exosomes, also simply called exosomes, have a diameter of about 40-100 nm. [GOC:BHF, GOC:mah, PMID:15908444, PMID:17641064, PMID:19442504, PMID:19498381, PMID:22418571, PMID:24009894]	complement component 1, r subcomponent	Immunodeficiency due to an early component of complement deficiency
ENST00000263640	ACVR1	0.000128591	0.00192742	2.4171	0.631237	3.21	3.68918	1.13103	0.662047	0.160325	0.662047	ENSG00000115170	ACVR1	11.2133	GO:2000017	positive regulation of determination of dorsal identity	Any process that activates or increases the frequency, rate or extent of determination of dorsal identity. [GOC:obol]	activin A receptor type I	FIBRODYSPLASIA OSSIFICANS PROGRESSIVA
ENST00000563432	GLG1	0.000391529	0.00495171	2.41604	0.681394	1.33288	3.53418	1.03062	1.05871	0.812834	1.05871	ENSG00000090863	GLG1	11.2014	GO:0017134	fibroblast growth factor binding	Interacting selectively and non-covalently with a fibroblast growth factor. [PMID:9806903]	golgi glycoprotein 1
ENST00000481145	GBP5	2.22157e-31	9.08957e-29	2.41593	0.207327	3.77046	2.3859	0.111374	-0.00468525	0.0820549	0.0820549	ENSG00000154451	GBP5	11.2001	GO:0072616	interleukin-18 secretion	The regulated release of interleukin-18 from a cell. [GOC:BHF, GOC:mah, http://www.copewithcytokines.de/cope.cgi?key=interleukins]	guanylate binding protein 5	interleukin-1 beta secretion
ENST00000454075	STAT6	0.00126192	0.0131227	2.41569	0.749166	2.07298	3.44761	2.06166	-0.846944	0.463965	0.463965	ENSG00000166888	STAT6	11.1975	GO:0035771	interleukin-4-mediated signaling pathway	A series of molecular signals initiated by the binding of interleukin-4 to a receptor on the surface of a cell, and ending with regulation of a downstream cellular process, e.g. transcription. [GOC:BHF, GOC:signaling]	signal transducer and activator of transcription 6, interleukin-4 induced	Solitary fibrous tumor
ENST00000367128	FAM72A	1.12481e-05	0.000237226	2.41492	0.549885	2.9552	3.53253	1.15033	0.196272	0.21035	0.21035	ENSG00000196550	FAM72A	11.1888				family with sequence similarity 72 member A
ENST00000471642	DAP3	0.000434604	0.00542577	2.40994	0.685006	2.5158	5.81404	1.05425	1.05731	0.317685	1.05731	ENSG00000132676	DAP3	11.1333	GO:0070126	mitochondrial translational termination	The process resulting in the release of a polypeptide chain from the ribosome in a mitochondrion, usually in response to a termination codon (note that mitochondria use variants of the universal genetic code that differ between different taxa). [GOC:mah, http://mitogenome.org/index.php/Genetic_Code_of_mitochondria]	death associated protein 3
ENST00000497535	HBP1	2.71392e-06	6.76853e-05	2.40961	0.513627	1.46718	2.22683	0.447988	0.287713	0.73917	0.73917	ENSG00000105856	HBP1	11.1296	GO:0005515	protein binding	Interacting selectively and non-covalently with any protein or protein complex (a complex of two or more proteins that may include other nonprotein molecules). [GOC:go_curators]	HMG-box transcription factor 1
ENST00000519543	TG	0.00044902	0.00557632	2.40924	0.6865	1.39775	2.58054	1.34414	-0.188504	0.776631	0.776631	ENSG00000042832	TG	11.1255				thyroglobulin	Familial thyroid dyshormonogenesis
ENST00000513103	DDX60L	1.77576e-06	4.63013e-05	2.40817	0.504076	1.27554	2.39458	0.297585	0.447591	0.845833	0.845833	ENSG00000181381	DDX60L	11.1136	GO:0004386	helicase activity	Catalysis of the reaction: NTP + H2O = NDP + phosphate, to drive the unwinding of a DNA or RNA helix. [GOC:mah, ISBN:0198506732]	DEAD (Asp-Glu-Ala-Asp) box polypeptide 60-like
ENST00000377708	BTN3A2	0.00113585	0.0120381	2.40486	0.738929	1.77004	4.00675	1.86665	0.254564	0.590425	0.590425	ENSG00000186470	BTN3A2	11.0769	GO:0072643	interferon-gamma secretion	The regulated release of interferon-gamma from a cell. [GOC:BHF, GOC:mah, PMID:15546383]	butyrophilin subfamily 3 member A2	T cell mediated immunity
ENST00000368702	S100A14	3.47816e-06	8.42202e-05	2.40299	0.517846	1.40667	2.02312	0.434996	0.0999285	0.771744	0.771744	ENSG00000189334	S100A14	11.0562	GO:0071624	positive regulation of granulocyte chemotaxis	Any process that increases the rate, frequency or extent of granulocyte chemotaxis. Granulocyte chemotaxis is the movement of a granulocyte in response to an external stimulus. [GOC:mah]	S100 calcium binding protein A14	chemokine receptor binding
ENST00000222339	ZNF574	0.000631292	0.00736154	2.40264	0.702977	2.08757	3.51013	0.792194	1.4316	0.458442	1.4316	ENSG00000105732	ZNF574	11.0523	GO:0046872	metal ion binding	Interacting selectively and non-covalently with any metal ion. [GOC:ai]	zinc finger protein 574
ENST00000451316	IP6K3	0.000179618	0.00256381	2.40119	0.640988	2.44475	4.39924	0.397997	1.4509	0.338504	1.4509	ENSG00000161896	IP6K3	11.0363	GO:0000831	inositol hexakisphosphate 6-kinase activity	Catalysis of the reaction: ATP + 1D-myo-inositol hexakisphosphate = ADP + 6-diphospho-1D-myo-inositol (1,2,3,4,5)pentakisphosphate. [GOC:elh, PMID:16429326]	inositol hexakisphosphate kinase 3
ENST00000359357	DNAH8	0.00160111	0.0159004	2.40118	0.760901	1.49384	4.80613	1.2737	1.33167	0.725129	1.33167	ENSG00000124721	DNAH8	11.0362	GO:0030286	dynein complex	Any of several large complexes that contain two or three dynein heavy chains and several light chains, and have microtubule motor activity. [ISBN:0815316194]	dynein, axonemal, heavy chain 8
ENST00000528362	PSMC3	1.96291e-05	0.000383825	2.40084	0.562381	1.10539	2.23273	0.473736	0.327111	0.949488	0.949488	ENSG00000165916	PSMC3	11.0325	GO:0030163	protein catabolic process	The chemical reactions and pathways resulting in the breakdown of a protein by the destruction of the native, active configuration, with or without the hydrolysis of peptide bonds. [GOC:mah]	proteasome 26S subunit, ATPase 3
ENST00000443632	HIC2	0.0052592	0.040951	2.39781	0.859212	3.39119	5.39689	3.19317	-0.469845	0.128938	0.128938	ENSG00000169635	HIC2	10.9991	GO:0005515	protein binding	Interacting selectively and non-covalently with any protein or protein complex (a complex of two or more proteins that may include other nonprotein molecules). [GOC:go_curators]	hypermethylated in cancer 2
ENST00000620709	CD40	9.48913e-07	2.64163e-05	2.39767	0.489126	2.64752	3.4348	0.794956	-0.384898	0.281645	0.281645	ENSG00000101017	CD40	10.9975	GO:2000353	positive regulation of endothelial cell apoptotic process	Any process that activates or increases the frequency, rate or extent of endothelial cell apoptotic process. [GOC:BHF, GOC:mah, GOC:mtg_apoptosis]	CD40 molecule, TNF receptor superfamily member 5	Hyper-IgM syndrome type 3
ENST00000420065	RHEBL1	6.13616e-05	0.00102599	2.39384	0.597337	1.99575	2.43339	1.11157	-0.0939689	0.494084	0.494084	ENSG00000167550	RHEBL1	10.9554	GO:0031929	TOR signaling	A series of molecular signals mediated by TOR (Target of rapamycin) proteins, members of the phosphoinositide (PI) 3-kinase related kinase (PIKK) family that act as serine/threonine kinases in response to nutrient availability or growth factors. [PMID:12372295]	Ras homolog enriched in brain like 1	insulin receptor signaling pathway
ENST00000470564	AK9	0.00196759	0.0187102	2.39152	0.772683	1.04778	2.26869	1.70007	-0.848351	0.98661	0.98661	ENSG00000155085	AK9	10.9301	GO:0019205	nucleobase-containing compound kinase activity	Catalysis of the transfer of a phosphate group, usually from ATP or GTP, to a nucleobase, nucleoside, nucleotide or polynucleotide substrate. [GOC:jl]	adenylate kinase 9
ENST00000443266	DNAJB5	3.10178e-05	0.000567109	2.3902	0.573758	1.29726	2.27607	0.648168	0.053581	0.833224	0.833224	ENSG00000137094	DNAJB5	10.9156	GO:0051087	chaperone binding	Interacting selectively and non-covalently with a chaperone protein, a class of proteins that bind to nascent or unfolded polypeptides and ensure correct folding or transport. [http://www.onelook.com]	DnaJ heat shock protein family (Hsp40) member B5
ENST00000523609	AGO2	0.00100184	0.0108516	2.38988	0.726406	3.05366	3.63138	0.903691	1.4708	0.190624	1.4708	ENSG00000123908	AGO2	10.9122	GO:0090625	mRNA cleavage involved in gene silencing by siRNA	The process in which small interfering RNAs (siRNAs) direct the cleavage of target mRNAs. Once incorporated into a RNA-induced silencing complex (RISC), a siRNA will typically direct cleavage by base pairing with perfect or near-perfect complementarity to the target mRNA. [GOC:BHF, GOC:BHF_miRNA, GOC:rph, PMID:15260970]	argonaute 2, RISC catalytic component	RNA secondary structure unwinding
ENST00000407997	APOBEC3G	3.00245e-12	2.41258e-10	2.38447	0.341731	3.92099	2.37769	0.261498	0.264014	0.069798	0.264014	ENSG00000239713	APOBEC3G	10.8533	GO:0030895	apolipoprotein B mRNA editing enzyme complex	Protein complex that mediates editing of the mRNA encoding apolipoprotein B; catalyzes the deamination of C to U (residue 6666 in the human mRNA). Contains a catalytic subunit, APOBEC-1, and other proteins (e.g. human ASP; rat ASP and KSRP). [PMID:10781591]	apolipoprotein B mRNA editing enzyme, catalytic polypeptide-like 3G
ENST00000584176	GRIN2C	3.66313e-08	1.43146e-06	2.38351	0.432863	2.3988	2.32606	0.180383	0.662786	0.352481	0.662786	ENSG00000161509	GRIN2C	10.8428	GO:0007215	glutamate receptor signaling pathway	A series of molecular signals initiated by the binding of glutamate to a glutamate receptor on the surface of a target cell, and ending with regulation of a downstream cellular process, e.g. transcription. [GOC:mah, GOC:signaling, PMID:9131252]	glutamate receptor, ionotropic, N-methyl D-aspartate 2C
ENST00000615675	ZNF274	0.000303699	0.00398404	2.38332	0.65981	1.44591	3.28366	1.20857	0.721734	0.750509	0.750509	ENSG00000171606	ZNF274	10.8408	GO:0005166	neurotrophin p75 receptor binding	Interacting selectively and non-covalently with the neurotrophin p75 receptor. [GOC:ai]	zinc finger protein 274
ENST00000370399	TGFBR3	8.11678e-05	0.00130304	2.37866	0.60358	1.28007	2.9493	0.796198	0.800817	0.843192	0.843192	ENSG00000069702	TGFBR3	10.7905				transforming growth factor beta receptor III	Familial cerebral saccular aneurysm
ENST00000617438	RBM48	0.0053171	0.0412575	2.37557	0.852324	1.62297	4.8259	2.0429	1.22615	0.659768	1.22615	ENSG00000127993	RBM48	10.7571	GO:0003723	RNA binding	Interacting selectively and non-covalently with an RNA molecule or a portion thereof. [GOC:mah]	RNA binding motif protein 48
ENST00000275080	CD164	0.00322709	0.0278829	2.37414	0.806095	1.75459	4.14021	1.35688	1.56718	0.597466	1.56718	ENSG00000135535	CD164	10.7418	GO:0007162	negative regulation of cell adhesion	Any process that stops, prevents, or reduces the frequency, rate or extent of cell adhesion. [GOC:go_curators]	CD164 molecule, sialomucin
ENST00000403687	RASGRP3	8.17586e-05	0.0013103	2.37302	0.602413	4.80873	3.23105	0.445544	1.18751	0.0297682	1.18751	ENSG00000152689	RASGRP3	10.7297	GO:0019992	diacylglycerol binding	Interacting selectively and non-covalently with diacylglycerol, a diester of glycerol and two fatty acids. [GOC:ma]	RAS guanyl releasing protein 3 (calcium and DAG-regulated)
ENST00000555357	CDK2	0.000208783	0.00291312	2.37261	0.639837	0.933325	1.93044	0.778688	-0.326186	1.06357	1.06357	ENSG00000123374	CDK2	10.7253	GO:0060968	regulation of gene silencing	Any process that modulates the rate, frequency, or extent of gene silencing, the transcriptional or post-transcriptional process carried out at the cellular level that results in long-term gene inactivation. [GOC:dph, GOC:tb]	cyclin-dependent kinase 2
ENST00000548159	CNOT2	0.00152407	0.0152999	2.36905	0.747319	1.38094	3.85368	1.72729	0.427439	0.785902	0.785902	ENSG00000111596	CNOT2	10.6872				CCR4-NOT transcription complex subunit 2	RNA phosphodiester bond hydrolysis exonucleolytic
ENST00000511430	CD38	9.94768e-10	5.31383e-08	2.36771	0.387498	1.93308	4.62929	0.156103	0.0115271	0.519594	0.519594	ENSG00000004468	CD38	10.6729	GO:0050135	NAD(P)+ nucleosidase activity	Catalysis of the reaction: NAD(P)+ + H2O = ADP-ribose(P) + nicotinamide. [EC:3.2.2.6, MetaCyc:NADP+-NUCLEOSIDASE-RXN]	CD38 molecule	B cell receptor signaling pathway
ENST00000498485	PSMB7	4.08357e-10	2.31015e-08	2.3671	0.378687	2.82073	1.89379	0.405996	0.0371689	0.239322	0.239322	ENSG00000136930	PSMB7	10.6664	GO:1903955	positive regulation of protein targeting to mitochondrion	Any process that activates or increases the frequency, rate or extent of protein targeting to mitochondrion. [GO_REF:0000058, GOC:pad, GOC:PARL, GOC:TermGenie, PMID:24270810]	proteasome subunit beta 7	positive regulation of protein targeting to mitochondrion
ENST00000255688	RARRES3	5.5807e-15	6.51883e-13	2.36466	0.302655	5.53225	4.73977	0.390928	-0.0510952	0.0212707	0.0212707	ENSG00000133321	RARRES3	10.6405	GO:0005515	protein binding	Interacting selectively and non-covalently with any protein or protein complex (a complex of two or more proteins that may include other nonprotein molecules). [GOC:go_curators]	retinoic acid receptor responder (tazarotene induced) 3
ENST00000374897	TAP2	0.000548638	0.00657818	2.36432	0.684157	4.15082	9.08741	2.0517	-1.07381	0.0546152	0.0546152	ENSG00000204267	TAP2	10.6368	GO:0046980	tapasin binding	Interacting selectively and non-covalently with tapasin, a member of the MHC class I loading complex which bridges the TAP peptide transporter to class I molecules. [PMID:12594855]	transporter 2, ATP-binding cassette, sub-family B (MDR/TAP)	Immunodeficiency by defective expression of HLA class 1
ENST00000519442	SOX30	1.58846e-05	0.000321141	2.36359	0.547628	1.13712	1.79536	0.420048	-0.0815947	0.929487	0.929487	ENSG00000039600	SOX30	10.629	GO:0031960	response to corticosteroid	Any process that results in a change in state or activity of a cell or an organism (in terms of movement, secretion, enzyme production, gene expression, etc.) as a result of a corticosteroid hormone stimulus. A corticosteroid is a steroid hormone that is produced in the adrenal cortex. Corticosteroids are involved in a wide range of physiologic systems such as stress response, immune response and…	SRY-box 30
ENST00000366731	MRPL55	0.00429766	0.0349187	2.35975	0.826403	2.54061	4.6568	0.717822	2.35542	0.310641	2.35542	ENSG00000162910	MRPL55	10.5883	GO:0005840	ribosome	An intracellular organelle, about 200 A in diameter, consisting of RNA and protein. It is the site of protein biosynthesis resulting from translation of messenger RNA (mRNA). It consists of two subunits, one large and one small, each containing only protein and RNA. Both the ribosome and its subunits are characterized by their sedimentation coefficients, expressed in Svedberg units (symbol: S). H…	mitochondrial ribosomal protein L55
ENST00000508256	PPM1K	0.000128264	0.00192404	2.35847	0.615827	3.64787	2.99734	0.280296	1.42629	0.0942503	1.42629	ENSG00000163644	PPM1K	10.5748	GO:0009083	branched-chain amino acid catabolic process	The chemical reactions and pathways resulting in the breakdown of amino acids containing a branched carbon skeleton, comprising isoleucine, leucine and valine. [GOC:ai]	protein phosphatase, Mg2+/Mn2+ dependent 1K	Intermediate maple syrup urine disease
ENST00000263339	IL1A	8.31015e-34	4.05819e-31	2.35833	0.194587	3.77062	2.20962	0.0522555	0.118133	0.082041	0.118133	ENSG00000115008	IL1A	10.5733	GO:0046688	response to copper ion	Any process that results in a change in state or activity of a cell or an organism (in terms of movement, secretion, enzyme production, gene expression, etc.) as a result of a copper ion stimulus. [GOC:ai]	interleukin 1 alpha	cytokine activity
ENST00000537108	CAPRIN2	0.00675986	0.049798	2.3574	0.870389	3.38494	4.56874	1.55083	1.85827	0.129933	1.85827	ENSG00000110888	CAPRIN2	10.5635				caprin family member 2
ENST00000393915	HMMR	0.000675695	0.0077883	2.357	0.693388	4.33312	3.98076	1.08265	1.08089	0.0452585	1.08089	ENSG00000072571	HMMR	10.5593	GO:0030203	glycosaminoglycan metabolic process	The chemical reactions and pathways involving glycosaminoglycans, any one of a group of polysaccharides that contain amino sugars. Formerly known as mucopolysaccharides, they include hyaluronic acid and chondroitin, which provide lubrication in joints and form part of the matrix of cartilage. The three-dimensional structure of these molecules enables them to trap water, which forms a gel and give…	hyaluronan-mediated motility receptor (RHAMM)
ENST00000601645	HNRNPM	1.95187e-05	0.000382501	2.3555	0.551598	1.60204	2.37517	0.699104	0.0981974	0.670069	0.670069	ENSG00000099783	HNRNPM	10.5434	GO:0000380	alternative mRNA splicing, via spliceosome	The process of generating multiple mRNA molecules from a given set of exons by differential use of exons from the primary transcript(s) to form multiple mature mRNAs that vary in their exon composition. [GOC:krc, PMID:12110900]	heterogeneous nuclear ribonucleoprotein M	alternative mRNA splicing via spliceosome
ENST00000553808	WARS	2.78483e-05	0.000516648	2.35495	0.561989	2.60007	2.75236	1.127	-0.0882998	0.294243	0.294243	ENSG00000140105	WARS	10.5376	GO:0006436	tryptophanyl-tRNA aminoacylation	The process of coupling tryptophan to tryptophanyl-tRNA, catalyzed by tryptophanyl-tRNA synthetase. In tRNA aminoacylation, the amino acid is first activated by linkage to AMP and then transferred to either the 2'- or the 3'-hydroxyl group of the 3'-adenosine residue of the tRNA. [GOC:mcc, ISBN:0716730510]	tryptophanyl-tRNA synthetase
ENST00000496156	LRRC41	9.16852e-08	3.2751e-06	2.35463	0.440737	1.80469	2.28953	0.299282	0.435681	0.57484	0.57484	ENSG00000132128	LRRC41	10.5342				leucine rich repeat containing 41
ENST00000522100	TNIP1	3.58384e-05	0.000641911	2.35415	0.569628	1.85146	2.4478	0.905888	0.205012	0.554253	0.554253	ENSG00000145901	TNIP1	10.5292	GO:0085032	modulation by symbiont of host I-kappaB kinase/NF-kappaB cascade	Any process in which an organism modulates the frequency, rate or extent of host NF-kappaB-mediated signal transduction pathways during the host defense response. The host is defined as the larger of the organisms involved in a symbiotic interaction. [GOC:pamgo_curators]	TNFAIP3 interacting protein 1	leukocyte cell-cell adhesion
ENST00000450302	ZNF92	0.00316781	0.0274632	2.35382	0.797644	2.85703	5.71163	1.86213	1.00094	0.231172	1.00094	ENSG00000146757	ZNF92	10.5257	GO:0000978	RNA polymerase II core promoter proximal region sequence-specific DNA binding	Interacting selectively and non-covalently with a sequence of DNA that is in cis with and relatively close to a core promoter for RNA polymerase II. [GOC:txnOH]	zinc finger protein 92
ENST00000356116	ACSL5	0.00114057	0.0120729	2.35358	0.723436	2.96928	4.74441	0.683736	1.67138	0.207507	1.67138	ENSG00000197142	ACSL5	10.5232	GO:2001236	regulation of extrinsic apoptotic signaling pathway	Any process that modulates the frequency, rate or extent of extrinsic apoptotic signaling pathway. [GOC:mtg_apoptosis]	acyl-CoA synthetase long-chain family member 5
ENST00000262426	FOXF1	4.566e-39	2.8329e-36	2.35288	0.17995	3.79464	1.61418	0.0657656	-0.00356148	0.0799542	0.0799542	ENSG00000103241	FOXF1	10.5158	GO:0060446	branching involved in open tracheal system development	The process in which the anatomical structures of branches in the open tracheal system are generated and organized. [GOC:dph]	forkhead box F1	Congenital alveolar capillary dysplasia
ENST00000525587	TIMM10	0.000213712	0.00296599	2.34909	0.634507	2.09722	3.16306	1.03234	0.779356	0.454817	0.779356	ENSG00000134809	TIMM10	10.476	GO:0045039	protein import into mitochondrial inner membrane	The process comprising the import of proteins into the mitochondrion from outside the organelle and their insertion into the mitochondrial inner membrane. The translocase of the outer membrane complex mediates the passage of these proteins across the outer membrane, after which they are guided by either of two inner membrane translocase complexes into their final destination in the inner membrane…	translocase of inner mitochondrial membrane 10 homolog (yeast)
ENST00000496719	BTN3A3	4.29655e-05	0.000750718	2.34665	0.573624	2.17178	2.64125	1.05313	-0.0749346	0.42757	0.42757	ENSG00000111801	BTN3A3	10.4505	GO:0005515	protein binding	Interacting selectively and non-covalently with any protein or protein complex (a complex of two or more proteins that may include other nonprotein molecules). [GOC:go_curators]	butyrophilin subfamily 3 member A3	T cell mediated immunity
ENST00000528796	ZNF195	3.14519e-12	2.51925e-10	2.34492	0.336378	2.75939	1.91181	0.138825	0.370352	0.253656	0.370352	ENSG00000005801	ZNF195	10.4324	GO:0005622	intracellular	The living contents of a cell; the matter contained within (but not including) the plasma membrane, usually taken to exclude large vacuoles and masses of secretory or ingested material. In eukaryotes it includes the nucleus and cytoplasm. [ISBN:0198506732]	zinc finger protein 195
ENST00000339711	PRDM8	0.0028756	0.0253982	2.34321	0.786118	1.60224	5.75913	2.11095	0.570434	0.669971	0.669971	ENSG00000152784	PRDM8	10.4146	GO:0014003	oligodendrocyte development	The process aimed at the progression of an oligodendrocyte over time, from initial commitment of the cell to a specific fate, to the fully functional differentiated cell. An oligodendrocyte is a type of glial cell involved in myelinating the axons in the central nervous system. [GOC:dgh, GOC:ef]	PR domain containing 8	Early-onset Lafora body disease
ENST00000510590	DDX60L	1.06248e-27	3.46648e-25	2.34255	0.214767	5.75345	1.66021	0.0150626	0.1925	0.0195376	0.1925	ENSG00000181381	DDX60L	10.4078	GO:0004386	helicase activity	Catalysis of the reaction: NTP + H2O = NDP + phosphate, to drive the unwinding of a DNA or RNA helix. [GOC:mah, ISBN:0198506732]	DEAD (Asp-Glu-Ala-Asp) box polypeptide 60-like
ENST00000523421	CHTF8	0.000118705	0.00180062	2.34206	0.60852	1.39439	2.20027	0.88786	-0.184182	0.778476	0.778476	ENSG00000168802	CHTF8	10.4027	GO:0070062	extracellular exosome	A membrane-bounded vesicle that is released into the extracellular region by fusion of the limiting endosomal membrane of a multivesicular body with the plasma membrane. Extracellular exosomes, also simply called exosomes, have a diameter of about 40-100 nm. [GOC:BHF, GOC:mah, PMID:15908444, PMID:17641064, PMID:19442504, PMID:19498381, PMID:22418571, PMID:24009894]	chromosome transmission fidelity factor 8
ENST00000313735	NOS2	2.10926e-07	6.95064e-06	2.33704	0.450345	1.54595	3.7951	0.214411	0.500196	0.698235	0.698235	ENSG00000007171	NOS2	10.3505	GO:0043457	regulation of cellular respiration	Any process that modulates the frequency, rate or extent of cellular respiration, the enzymatic release of energy from organic compounds. [GOC:jl]	nitric oxide synthase 2	positive regulation of calcium ion transport into cytosol
ENST00000392323	STAT1	3.94237e-21	8.69999e-19	2.3356	0.247569	5.90688	1.7834	0.0682624	0.207545	0.0182589	0.207545	ENSG00000115415	STAT1	10.3357	GO:0003700	transcription factor activity, sequence-specific DNA binding	Interacting selectively and non-covalently with a specific DNA sequence in order to modulate transcription. The transcription factor may or may not also interact selectively with a protein or macromolecular complex. [GOC:curators, GOC:txnOH]	signal transducer and activator of transcription 1	Autoimmune enteropathy and endocrinopathy-susceptibility to chronic infections syndrome
ENST00000615337	SLC35B2	0.000980703	0.0106686	2.3348	0.708373	6.11979	4.48394	1.75941	0.498659	0.0168488	0.498659	ENSG00000157593	SLC35B2	10.3274	GO:0016021	integral component of membrane	The component of a membrane consisting of the gene products and protein complexes having at least some part of their peptide sequence embedded in the hydrophobic region of the membrane. [GOC:dos, GOC:go_curators]	solute carrier family 35 (adenosine 3'-phospho 5'-phosphosulfate transporter), member B2	positive regulation of I-kappaB kinase/NF-kappaB signaling
ENST00000577944	HEXDC	0.00369523	0.030968	2.33259	0.80349	1.31567	4.60635	1.72684	1.17834	0.822642	1.17834	ENSG00000169660	HEXDC	10.3046	GO:0004563	beta-N-acetylhexosaminidase activity	Catalysis of the hydrolysis of terminal non-reducing N-acetyl-D-hexosamine residues in N-acetyl-beta-D-hexosaminides. [EC:3.2.1.52]	hexosaminidase (glycosyl hydrolase family 20, catalytic domain) containing
ENST00000341469	TRIM14	3.41687e-28	1.16501e-25	2.33213	0.211817	7.20806	1.63236	0.00109903	0.200801	0.0131741	0.200801	ENSG00000106785	TRIM14	10.2998	GO:0032897	negative regulation of viral transcription	Any process that stops, prevents, or reduces the frequency, rate or extent of viral transcription. [GOC:mah]	tripartite motif containing 14
ENST00000559913	STARD5	2.61212e-05	0.000490337	2.33002	0.554122	0.98082	1.87676	0.350626	0.138505	1.03111	1.03111	ENSG00000172345	STARD5	10.2782	GO:0006700	C21-steroid hormone biosynthetic process	The chemical reactions and pathways resulting in the formation of C21-steroid hormones, steroid compounds containing 21 carbons which function as hormones. [GOC:ai]	StAR related lipid transfer domain containing 5
ENST00000544855	NDUFC1	0.000124215	0.00187109	2.32985	0.607103	2.43273	2.59566	1.31646	-0.0144515	0.342123	0.342123	ENSG00000109390	NDUFC1	10.2764	GO:0005747	mitochondrial respiratory chain complex I	A protein complex located in the mitochondrial inner membrane that forms part of the mitochondrial respiratory chain. It contains about 25 different polypeptide subunits, including NADH dehydrogenase (ubiquinone), flavin mononucleotide and several different iron-sulfur clusters containing non-heme iron. The iron undergoes oxidation-reduction between Fe(II) and Fe(III), and catalyzes proton transl…	NADH:ubiquinone oxidoreductase subunit C1
ENST00000333007	TNFAIP2	1.29544e-120	1.2257e-116	2.32897	0.0997303	6.10536	1.54212	0.0242628	0.0204949	0.0169316	0.0204949	ENSG00000185215	TNFAIP2	10.2673				TNF alpha induced protein 2
ENST00000418040	BPGM	0.000130697	0.00195395	2.3288	0.608814	1.80114	2.78064	1.09152	0.0715312	0.576424	0.576424	ENSG00000172331	BPGM	10.2656	GO:0046538	2,3-bisphosphoglycerate-dependent phosphoglycerate mutase activity	Catalysis of the reaction: 2-phospho-D-glycerate = 3-phospho-D-glycerate; this reaction requires the cofactor 2,3-bisphosphoglycerate. [EC:5.4.2.1]	bisphosphoglycerate mutase	Hemolytic anemia due to diphosphoglycerate mutase deficiency
ENST00000490299	RPS6KC1	0.00471886	0.0375944	2.32774	0.823798	2.43409	5.4195	1.76019	1.29371	0.341711	1.29371	ENSG00000136643	RPS6KC1	10.2548	GO:0005515	protein binding	Interacting selectively and non-covalently with any protein or protein complex (a complex of two or more proteins that may include other nonprotein molecules). [GOC:go_curators]	ribosomal protein S6 kinase, 52kDa, polypeptide 1
ENST00000370924	PTGER3	5.38433e-21	1.16445e-18	2.32522	0.247327	3.09984	2.32699	0.0937939	0.166303	0.181475	0.181475	ENSG00000050628	PTGER3	10.229	GO:0031622	positive regulation of fever generation	Any process that activates or increases the frequency, rate, or extent of fever generation. [GOC:add]	prostaglandin E receptor 3
ENST00000482151	KIF5C	1.8894e-05	0.00037306	2.32494	0.543518	4.09748	8.21339	1.08313	0.246223	0.0577832	0.246223	ENSG00000168280	KIF5C	10.2261	GO:0008104	protein localization	Any process in which a protein is transported to, or maintained in, a specific location. [GOC:ai]	kinesin family member 5C	CORTICAL DYSPLASIA COMPLEX WITH OTHER BRAIN MALFORMATIONS 2
ENST00000488273	HLA-C	0.000355326	0.00455627	2.32424	0.650826	4.29961	5.10568	0.520846	1.38524	0.0468166	1.38524	ENSG00000237022	HLA-C	10.2189	GO:0019882	antigen processing and presentation	The process in which an antigen-presenting cell expresses antigen (peptide or lipid) on its cell surface in association with an MHC protein complex. [GO_REF:0000022, GOC:add, GOC:mtg_15nov05, ISBN:0781735149, PMID:15771591, PMID:15928678]	major histocompatibility complex, class I, C	PSORIASIS 1 SUSCEPTIBILITY TO
ENST00000409897	SP100	0.00126558	0.0131587	2.32356	0.72078	1.8814	3.71177	1.14902	1.18884	0.541352	1.18884	ENSG00000067066	SP100	10.212	GO:1902044	regulation of Fas signaling pathway	Any process that modulates the frequency, rate or extent of Fas signaling pathway. [GOC:TermGenie, PMID:17245429]	SP100 nuclear antigen	negative regulation of cellular component movement
ENST00000559907	B2M	2.907e-05	0.000535636	2.32354	0.555786	2.30349	2.16737	1.00732	-0.1861	0.382721	0.382721	ENSG00000166710	B2M	10.2117	GO:0005515	protein binding	Interacting selectively and non-covalently with any protein or protein complex (a complex of two or more proteins that may include other nonprotein molecules). [GOC:go_curators]	beta-2-microglobulin	Immunodeficiency by defective expression of HLA class 1
ENST00000316436	LSMEM2	2.5232e-08	1.03461e-06	2.32302	0.416935	1.73403	2.11711	0.175334	0.595178	0.606923	0.606923	ENSG00000179564	LSMEM2	10.2065	GO:0005515	protein binding	Interacting selectively and non-covalently with any protein or protein complex (a complex of two or more proteins that may include other nonprotein molecules). [GOC:go_curators]	leucine-rich single-pass membrane protein 2
ENST00000421412	IL17RE	0.00658199	0.0487988	2.31953	0.85362	2.00647	4.56103	1.38929	1.88971	0.489815	1.88971	ENSG00000163701	IL17RE	10.1709	GO:0016021	integral component of membrane	The component of a membrane consisting of the gene products and protein complexes having at least some part of their peptide sequence embedded in the hydrophobic region of the membrane. [GOC:dos, GOC:go_curators]	interleukin 17 receptor E
ENST00000470940	SP100	7.18371e-06	0.000159553	2.31736	0.516326	1.59059	2.48347	0.398332	0.801333	0.675755	0.801333	ENSG00000067066	SP100	10.1488	GO:1902044	regulation of Fas signaling pathway	Any process that modulates the frequency, rate or extent of Fas signaling pathway. [GOC:TermGenie, PMID:17245429]	SP100 nuclear antigen	negative regulation of cellular component movement
ENST00000382357	OLIG2	4.56715e-08	1.7442e-06	2.31724	0.423829	2.09999	1.96305	0.354563	0.0610549	0.453778	0.453778	ENSG00000205927	OLIG2	10.1476	GO:0046983	protein dimerization activity	The formation of a protein dimer, a macromolecular structure consists of two noncovalently associated identical or nonidentical subunits. [ISBN:0198506732]	oligodendrocyte lineage transcription factor 2
ENST00000273691	ILDR1	7.56725e-05	0.00122731	2.31388	0.584652	1.20504	2.25173	0.650461	-0.524612	0.887722	0.887722	ENSG00000145103	ILDR1	10.1136	GO:0005515	protein binding	Interacting selectively and non-covalently with any protein or protein complex (a complex of two or more proteins that may include other nonprotein molecules). [GOC:go_curators]	immunoglobulin-like domain containing receptor 1	Autosomal recessive nonsyndromic sensorineural deafness type DFNB
ENST00000546318	IFIT1	4.10783e-17	6.0493e-15	2.31158	0.274868	5.64909	1.94157	0.0127099	0.327276	0.0203744	0.327276	ENSG00000185745	IFIT1	10.0904	GO:0071357	cellular response to type I interferon	Any process that results in a change in state or activity of a cell (in terms of movement, secretion, enzyme production, gene expression, etc.) as a result of a type I interferon stimulus. Type I interferons include the interferon-alpha, beta, delta, episilon, zeta, kappa, tau, and omega gene families. [GOC:mah, PR:000025848]	interferon induced protein with tetratricopeptide repeats 1	negative regulation of viral genome replication
ENST00000526490	LBHD1	0.000163461	0.00236892	2.31055	0.61293	1.86671	2.91152	1.13988	0.550692	0.547658	0.550692	ENSG00000162194	LBHD1	10.0799				LBH domain containing 1
ENST00000395770	LNPEP	3.17655e-05	0.000578405	2.31043	0.555336	4.29071	5.83881	0.0667518	1.32104	0.0472422	1.32104	ENSG00000113441	LNPEP	10.0788	GO:0031905	early endosome lumen	The volume enclosed by the membrane of an early endosome. [GOC:mah]	leucyl/cystinyl aminopeptidase
ENST00000494762	ACTN2	1.91304e-05	0.000376798	2.31023	0.54043	2.103	2.98323	0.0896228	1.22467	0.452655	1.22467	ENSG00000077522	ACTN2	10.0768	GO:2001137	positive regulation of endocytic recycling	Any process that activates or increases the frequency, rate or extent of endocytic recycling. [GOC:obol]	actinin, alpha 2	Familial isolated dilated cardiomyopathy
ENST00000343381	ZNF669	1.97606e-06	5.08756e-05	2.31021	0.485761	3.44312	2.27231	0.940901	0.011908	0.120935	0.120935	ENSG00000188295	ZNF669	10.0765	GO:0005622	intracellular	The living contents of a cell; the matter contained within (but not including) the plasma membrane, usually taken to exclude large vacuoles and masses of secretory or ingested material. In eukaryotes it includes the nucleus and cytoplasm. [ISBN:0198506732]	zinc finger protein 669
ENST00000461428	GTPBP1	1.93361e-06	4.99524e-05	2.30829	0.48491	1.48261	1.99063	0.327096	0.157967	0.731022	0.731022	ENSG00000100226	GTPBP1	10.0572	GO:0000177	cytoplasmic exosome (RNase complex)	Complex of 3'-5' exoribonucleases found in the cytoplasm. [PMID:10465791]	GTP binding protein 1
ENST00000568612	VPS35	0.00451678	0.0363364	2.30777	0.812706	1.77364	4.17323	1.55692	1.41528	0.588792	1.41528	ENSG00000069329	VPS35	10.052	GO:0005488	binding	The selective, non-covalent, often stoichiometric, interaction of a molecule with one or more specific sites on another molecule. [GOC:ceb, GOC:mah, ISBN:0198506732]	VPS35 retromer complex component	Hereditary late-onset Parkinson disease
ENST00000564974	MT1X	1.87569e-06	4.86554e-05	2.30703	0.484022	2.02256	2.54911	0.420473	0.633776	0.483462	0.633776	ENSG00000187193	MT1X	10.0446	GO:0071276	cellular response to cadmium ion	Any process that results in a change in state or activity of a cell (in terms of movement, secretion, enzyme production, gene expression, etc.) as a result of a cadmium (Cd) ion stimulus. [GOC:mah]	metallothionein 1X
ENST00000461367	ACTN2	6.14661e-09	2.85433e-07	2.30345	0.396278	2.80021	2.27868	0.230597	0.476067	0.244037	0.476067	ENSG00000077522	ACTN2	10.0087	GO:2001137	positive regulation of endocytic recycling	Any process that activates or increases the frequency, rate or extent of endocytic recycling. [GOC:obol]	actinin, alpha 2	Familial isolated dilated cardiomyopathy
ENST00000559178	WDR73	4.95075e-06	0.000114857	2.30279	0.50424	1.49161	1.98159	0.417864	0.209108	0.726296	0.726296	ENSG00000177082	WDR73	10.0021	GO:0032154	cleavage furrow	In animal cells, the first sign of cleavage, or cytokinesis, is the appearance of a shallow groove in the cell surface near the old metaphase plate. A contractile ring containing actin and myosin is located just inside the plasma membrane at the location of the furrow. Ring contraction is associated with centripetal growth of the membrane that deepens the cleavage furrow and divides the cytoplasm…	WD repeat domain 73	CAMOS syndrome
ENST00000493208	IRF1	2.79116e-08	1.12498e-06	2.30187	0.414449	1.79576	1.85696	0.194128	0.286173	0.578828	0.578828	ENSG00000125347	IRF1	9.99288	GO:2000564	regulation of CD8-positive, alpha-beta T cell proliferation	Any process that modulates the frequency, rate or extent of CD8-positive, alpha-beta T cell proliferation. [GOC:obol]	interferon regulatory factor 1	RNA polymerase II core promoter proximal region sequence-specific DNA binding
ENST00000426362	TXNL4B	3.25273e-05	0.000589864	2.30137	0.553878	3.12814	2.65919	0.511324	0.869191	0.175936	0.869191	ENSG00000140830	TXNL4B	9.98785	GO:0005681	spliceosomal complex	Any of a series of ribonucleoprotein complexes that contain snRNA(s) and small nuclear ribonucleoproteins (snRNPs), and are formed sequentially during the spliceosomal splicing of one or more substrate RNAs, and which also contain the RNA substrate(s) from the initial target RNAs of splicing, the splicing intermediate RNA(s), to the final RNA products. During cis-splicing, the initial target RNA …	thioredoxin like 4B
ENST00000301068	RHEBL1	4.91202e-06	0.000114156	2.29999	0.503444	2.99945	2.64824	0.939085	-0.0862774	0.201464	0.201464	ENSG00000167550	RHEBL1	9.97406	GO:0031929	TOR signaling	A series of molecular signals mediated by TOR (Target of rapamycin) proteins, members of the phosphoinositide (PI) 3-kinase related kinase (PIKK) family that act as serine/threonine kinases in response to nutrient availability or growth factors. [PMID:12372295]	Ras homolog enriched in brain like 1	insulin receptor signaling pathway
ENST00000436941	TLDC2	2.32082e-13	2.16608e-11	2.29904	0.313695	2.78183	1.70066	0.194492	0.139086	0.248329	0.248329	ENSG00000101342	TLDC2	9.96458				TBC/LysM-associated domain containing 2
ENST00000261454	PROX1	0.0023236	0.0213473	2.2987	0.754808	1.76123	6.77334	1.62591	0.937896	0.594432	0.937896	ENSG00000117707	PROX1	9.96126				prospero homeobox 1	DNA binding
ENST00000459640	NECAP2	4.51075e-05	0.00078436	2.29785	0.563249	1.40034	2.41033	0.652414	0.435171	0.77521	0.77521	ENSG00000157191	NECAP2	9.95274	GO:0030125	clathrin vesicle coat	A clathrin coat found on a vesicle. [GOC:mah]	NECAP endocytosis associated 2
ENST00000328880	HCAR2	5.91187e-06	0.000134826	2.29699	0.507115	1.06984	1.80354	0.184977	0.25143	0.972268	0.972268	ENSG00000182782	HCAR2	9.94416	GO:0070553	nicotinic acid receptor activity	Combining with nicotinic acid to initiate a change in cell activity. [CHEBI:15940, GOC:mah, PMID:12522134]	hydroxycarboxylic acid receptor 2
ENST00000540394	C1R	5.31871e-07	1.57446e-05	2.29577	0.457832	2.65229	3.36415	0.318439	0.624805	0.280402	0.624805	ENSG00000159403	C1R	9.93209	GO:0070062	extracellular exosome	A membrane-bounded vesicle that is released into the extracellular region by fusion of the limiting endosomal membrane of a multivesicular body with the plasma membrane. Extracellular exosomes, also simply called exosomes, have a diameter of about 40-100 nm. [GOC:BHF, GOC:mah, PMID:15908444, PMID:17641064, PMID:19442504, PMID:19498381, PMID:22418571, PMID:24009894]	complement component 1, r subcomponent	Immunodeficiency due to an early component of complement deficiency
ENST00000379100	P4HA2	0.00205562	0.0193817	2.29316	0.74403	1.53794	3.88809	1.78879	0.412664	0.702322	0.702322	ENSG00000072682	P4HA2	9.90616	GO:0005788	endoplasmic reticulum lumen	The volume enclosed by the membranes of the endoplasmic reticulum. [ISBN:0198547684]	prolyl 4-hydroxylase, alpha polypeptide II
ENST00000598277	DDX49	0.000279042	0.0037127	2.29222	0.630768	1.63276	2.72247	1.13542	0.33021	0.654985	0.654985	ENSG00000105671	DDX49	9.89689	GO:0010501	RNA secondary structure unwinding	The process in which a secondary structure of RNA are broken or 'melted'. [PMID:17169986]	DEAD (Asp-Glu-Ala-Asp) box polypeptide 49
ENST00000346141	TUBD1	0.00112324	0.0119254	2.29211	0.7036	1.80434	3.02311	1.65275	0.147504	0.574994	0.574994	ENSG00000108423	TUBD1	9.8958	GO:0007283	spermatogenesis	The process of formation of spermatozoa, including spermatocytogenesis and spermiogenesis. [GOC:jid, ISBN:9780878933846]	tubulin, delta 1
ENST00000436894	NCL	2.23909e-06	5.68355e-05	2.29193	0.484495	2.63396	2.45918	0.771106	0.176796	0.285202	0.285202	ENSG00000115053	NCL	9.89399	GO:1901838	positive regulation of transcription of nuclear large rRNA transcript from RNA polymerase I promoter	Any process that activates or increases the frequency, rate or extent of transcription of nuclear large rRNA transcript from RNA polymerase I promoter. [GOC:sart, GOC:TermGenie]	nucleolin	positive regulation of transcription of nuclear large rRNA transcript from RNA polymerase I promoter
ENST00000311946	NIPAL4	1.97207e-60	2.87062e-57	2.29018	0.139661	5.17591	1.49247	0.0102584	0.0775153	0.024326	0.0775153	ENSG00000172548	NIPAL4	9.87676	GO:1903830	magnesium ion transmembrane transport	The directed movement of magnesium ion across a membrane. [GO_REF:0000069, GOC:TermGenie, PMID:11254124]	NIPA-like domain containing 4	Congenital nonbullous ichthyosiform erythroderma
ENST00000483751	UBA7	3.93775e-12	3.11778e-10	2.29017	0.330024	3.72249	1.84507	0.403628	-0.177532	0.0864939	0.0864939	ENSG00000182179	UBA7	9.87661	GO:0019782	ISG15 activating enzyme activity	Catalysis of the activation of the small ubiquitin-related modifier ISG15, through the formation of an ATP-dependent high-energy thiolester bond. [GOC:mah]	ubiquitin-like modifier activating enzyme 7
ENST00000595047	GTF2F1	4.18917e-06	9.8998e-05	2.28924	0.49747	3.14366	2.69804	0.684708	0.428937	0.172924	0.428937	ENSG00000125651	GTF2F1	9.86747	GO:0005674	transcription factor TFIIF complex	A general transcription initiation factor which in humans consists of a heterodimer of an alpha and a beta subunit. Helps recruit RNA polymerase II to the initiation complex and promotes translation elongation. [GOC:jl, PMID:7597077]	general transcription factor IIF subunit 1
ENST00000320356	EZH2	0.000163777	0.00237213	2.28736	0.606856	2.27137	3.75197	1.26395	0.166367	0.393286	0.393286	ENSG00000106462	EZH2	9.84885	GO:0034968	histone lysine methylation	The modification of a histone by addition of one or more methyl groups to a lysine residue. [GOC:mah, GOC:pr]	enhancer of zeste 2 polycomb repressive complex 2 subunit	Weaver syndrome
ENST00000551241	OAS1	1.8331e-09	9.33104e-08	2.28615	0.380269	2.7247	2.13381	0.240517	0.410203	0.26208	0.410203	ENSG00000089127	OAS1	9.83704	GO:0060700	regulation of ribonuclease activity	Any process that modulates the rate, frequency, or extent of ribonuclease activity, catalysis of the hydrolysis of phosphodiester bonds in chains of RNA. [GOC:dph, GOC:tb]	2'-5'-oligoadenylate synthetase 1	glucose homeostasis
ENST00000250383	DHRS2	1.80508e-05	0.00035862	2.28493	0.532899	1.49523	3.09843	0.55351	0.408657	0.724404	0.724404	ENSG00000100867	DHRS2	9.82496	GO:0016491	oxidoreductase activity	Catalysis of an oxidation-reduction (redox) reaction, a reversible chemical reaction in which the oxidation state of an atom or atoms within a molecule is altered. One substrate acts as a hydrogen or electron donor and becomes oxidized, while the other acts as hydrogen or electron acceptor and becomes reduced. [GOC:go_curators]	dehydrogenase/reductase (SDR family) member 2	canonical Wnt signaling pathway involved in negative regulation of apoptotic process
ENST00000590840	ZCCHC2	0.000147132	0.00216544	2.28417	0.601753	2.00927	2.61418	1.14078	0.247606	0.488705	0.488705	ENSG00000141664	ZCCHC2	9.81754	GO:0035091	phosphatidylinositol binding	Interacting selectively and non-covalently with any inositol-containing glycerophospholipid, i.e. phosphatidylinositol (PtdIns) and its phosphorylated derivatives. [GOC:bf, ISBN:0198506732, PMID:11395417]	zinc finger, CCHC domain containing 2
ENST00000561217	TNFAIP2	4.06002e-24	1.06707e-21	2.28206	0.225274	4.10704	1.56456	0.171168	-0.0920538	0.0572003	0.0572003	ENSG00000185215	TNFAIP2	9.79687				TNF alpha induced protein 2
ENST00000361339	IFT140	0.00098529	0.0107091	2.28154	0.692489	1.16479	3.10161	1.24563	0.685853	0.912299	0.912299	ENSG00000187535	IFT140	9.79173	GO:0035721	intraciliary retrograde transport	The directed movement of large protein complexes along microtubules from the tip of a cilium (also called flagellum) toward the cell body, mediated by motor proteins. [GOC:BHF, GOC:cilia]	intraflagellar transport 140	Jeune syndrome
ENST00000519293	MTDH	0.000142875	0.00211305	2.28	0.599506	1.15496	2.68733	0.698951	0.309504	0.918381	0.918381	ENSG00000147649	MTDH	9.77671	GO:0046581	intercellular canaliculus	An extremely narrow tubular channel located between adjacent cells. An instance of this is the secretory canaliculi occurring between adjacent parietal cells in the gastric mucosa of vertebrates. [ISBN:0721662544]	metadherin	lipopolysaccharide-mediated signaling pathway
ENST00000498707	ADAMTS9	0.00179264	0.0173562	2.27792	0.729497	4.11409	5.67605	1.31234	1.0824	0.056775	1.0824	ENSG00000163638	ADAMTS9	9.75639	GO:0006516	glycoprotein catabolic process	The chemical reactions and pathways resulting in the breakdown of glycoproteins, any protein that contains covalently bound glycose (i.e. monosaccharide) residues; the glycose occurs most commonly as oligosaccharide or fairly small polysaccharide but occasionally as monosaccharide. [GOC:go_curators, ISBN:0198506732]	ADAM metallopeptidase with thrombospondin type 1 motif 9
ENST00000376014	TMEM51	0.00576481	0.0438819	2.27684	0.824684	2.58503	6.0044	1.7199	1.34057	0.298326	1.34057	ENSG00000171729	TMEM51	9.74587	GO:0008150	biological_process	Any process specifically pertinent to the functioning of integrated living units: cells, tissues, organs, and organisms. A process is a collection of molecular events with a defined beginning and end. [GOC:go_curators, GOC:isa_complete]	transmembrane protein 51
ENST00000560981	KNSTRN	0.000263388	0.00354365	2.27634	0.623847	1.33143	2.42419	0.937675	-0.102056	0.813657	0.813657	ENSG00000128944	KNSTRN	9.74098	GO:0035371	microtubule plus-end	The growing (plus) end of a microtubule. In vitro, microtubules polymerize more quickly at the plus end than at the minus end. In vivo, microtubule growth occurs only at the plus end, and the plus end switches between periods of growth and shortening, a behavior known as dynamic instability. [GOC:bf, GOC:lb, PMID:12700769, PMID:16643273]	kinetochore-localized astrin/SPAG5 binding protein	chromosome segregation
ENST00000466670	THAP7	0.0048014	0.0381036	2.27503	0.80673	1.63643	4.6253	1.44632	1.48234	0.653202	1.48234	ENSG00000184436	THAP7	9.72823	GO:0070742	C2H2 zinc finger domain binding	Interacting selectively and non-covalently with a C2H2-type zinc finger domain of a protein. The C2H2 zinc finger is the classical zinc finger domain, in which two conserved cysteines and histidines co-ordinate a zinc ion. [GOC:BHF, GOC:mah, Pfam:PF00096]	THAP domain containing 7
ENST00000504751	TRAPPC13	0.000307932	0.00403188	2.27411	0.630204	1.11012	2.86723	0.840719	0.8276	0.946486	0.946486	ENSG00000113597	TRAPPC13	9.71928	GO:0005515	protein binding	Interacting selectively and non-covalently with any protein or protein complex (a complex of two or more proteins that may include other nonprotein molecules). [GOC:go_curators]	trafficking protein particle complex 13
ENST00000613424	IRF1	1.76585e-09	9.01905e-08	2.27306	0.37771	3.72893	2.29881	0.55612	0.0796277	0.0858728	0.0858728	ENSG00000125347	IRF1	9.70907	GO:2000564	regulation of CD8-positive, alpha-beta T cell proliferation	Any process that modulates the frequency, rate or extent of CD8-positive, alpha-beta T cell proliferation. [GOC:obol]	interferon regulatory factor 1	RNA polymerase II core promoter proximal region sequence-specific DNA binding
ENST00000380498	CD68	0.00100904	0.0109172	2.27178	0.690933	3.30762	3.26487	1.10736	1.04089	0.142789	1.04089	ENSG00000129226	CD68	9.69669	GO:0005765	lysosomal membrane	The lipid bilayer surrounding the lysosome and separating its contents from the cell cytoplasm. [GOC:ai]	CD68 molecule
ENST00000518626	RNF185	0.00114446	0.0121056	2.2709	0.698228	1.79077	2.86281	1.61279	0.0816899	0.581064	0.581064	ENSG00000138942	RNF185	9.6881	GO:0036513	Derlin-1 retrotranslocation complex	A protein complex that functions in the retrotranslocation step of ERAD (ER-associated protein degradation), and includes at its core Derlin-1 oligomers forming a retrotranslocation channel. [GOC:bf, GOC:PARL, PMID:15215856, PMID:16186510]	ring finger protein 185	ER-associated ubiquitin-dependent protein catabolic process
ENST00000482211	HBEGF	1.32417e-05	0.000273554	2.26875	0.520825	1.47084	2.69857	0.483436	0.662365	0.737229	0.737229	ENSG00000113070	HBEGF	9.66734	GO:0090303	positive regulation of wound healing	Any process that increases the rate, frequency, or extent of the series of events that restore integrity to a damaged tissue, following an injury. [GOC:BHF]	heparin-binding EGF-like growth factor	positive regulation of endothelial cell chemotaxis by VEGF-activated vascular endothelial growth factor receptor signaling pathway
ENST00000583774	C17orf75	2.34687e-05	0.000446785	2.26855	0.536421	2.02176	2.65414	0.811089	0.451556	0.483777	0.483777	ENSG00000108666	C17orf75	9.66537				chromosome 17 open reading frame 75
ENST00000316170	GCNT2	3.60666e-05	0.000645387	2.26453	0.548136	2.32377	2.92843	0.237267	1.11477	0.376146	1.11477	ENSG00000111846	GCNT2	9.62663				glucosaminyl (N-acetyl) transferase 2, I-branching enzyme (I blood group)	Early-onset non-syndromic cataract
ENST00000534407	ROBO4	3.75471e-07	1.1586e-05	2.26124	0.44504	2.30165	2.88216	0.507951	-0.213857	0.38332	0.38332	ENSG00000154133	ROBO4	9.595	GO:0070062	extracellular exosome	A membrane-bounded vesicle that is released into the extracellular region by fusion of the limiting endosomal membrane of a multivesicular body with the plasma membrane. Extracellular exosomes, also simply called exosomes, have a diameter of about 40-100 nm. [GOC:BHF, GOC:mah, PMID:15908444, PMID:17641064, PMID:19442504, PMID:19498381, PMID:22418571, PMID:24009894]	roundabout guidance receptor 4
ENST00000487220	CHAC1	0.00200613	0.0190141	2.26009	0.73158	1.2125	3.59835	1.52522	0.583596	0.883218	0.883218	ENSG00000128965	CHAC1	9.58392	GO:0010955	negative regulation of protein processing	Any process that decreases the rate, frequency or extent of protein maturation by peptide bond cleavage. [GOC:dph, GOC:mah, GOC:tb]	ChaC glutathione-specific gamma-glutamylcyclotransferase 1	intrinsic apoptotic signaling pathway in response to endoplasmic reticulum stress
ENST00000614737	RPS9	0.000960238	0.0104776	2.25941	0.68427	2.44474	4.25827	1.44577	0.66125	0.338508	0.66125	ENSG00000278270	RPS9	9.57743	GO:0045903	positive regulation of translational fidelity	Any process that increases the ability of the translational apparatus to interpret the genetic code. [GOC:dph, GOC:tb]	ribosomal protein S9	positive regulation of cell proliferation
ENST00000392807	ISCU	1.2912e-05	0.000267839	2.25825	0.517757	3.6524	3.06855	0.73502	0.471307	0.0937497	0.471307	ENSG00000136003	ISCU	9.56629	GO:0016226	iron-sulfur cluster assembly	The incorporation of iron and exogenous sulfur into a metallo-sulfur cluster. [GOC:jl, GOC:mah, GOC:pde, GOC:vw]	iron-sulfur cluster assembly enzyme	Hereditary myopathy with lactic acidosis due to ISCU deficiency
ENST00000355478	RIC8B	0.000831447	0.009266	2.25723	0.67539	2.90915	3.29495	1.64185	0.410833	0.219897	0.410833	ENSG00000111785	RIC8B	9.55653	GO:0005488	binding	The selective, non-covalent, often stoichiometric, interaction of a molecule with one or more specific sites on another molecule. [GOC:ceb, GOC:mah, ISBN:0198506732]	RIC8 guanine nucleotide exchange factor B
ENST00000546919	ZNF385A	6.11852e-06	0.000138953	2.25704	0.499097	2.68644	2.26907	0.849303	-0.264601	0.271636	0.271636	ENSG00000161642	ZNF385A	9.55477	GO:2000765	regulation of cytoplasmic translation	Any process that modulates the frequency, rate or extent of cytoplasmic translation. [GOC:obol]	zinc finger protein 385A	negative regulation of intrinsic apoptotic signaling pathway in response to DNA damage by p53 class mediator
ENST00000441246	POLR2B	0.00475914	0.0378516	2.25643	0.79933	3.73057	3.98463	2.72848	0.146701	0.0857159	0.146701	ENSG00000047315	POLR2B	9.54893	GO:0032549	ribonucleoside binding	Interacting selectively and non-covalently with a ribonucleoside, a compound consisting of a purine or pyrimidine nitrogenous base linked to ribose. [GOC:mah]	polymerase (RNA) II (DNA directed) polypeptide B, 140kDa
ENST00000472769	SLC25A25	7.50634e-06	0.000166085	2.2561	0.503728	2.64979	2.3549	0.269695	0.872145	0.281054	0.872145	ENSG00000148339	SLC25A25	9.54578	GO:0070062	extracellular exosome	A membrane-bounded vesicle that is released into the extracellular region by fusion of the limiting endosomal membrane of a multivesicular body with the plasma membrane. Extracellular exosomes, also simply called exosomes, have a diameter of about 40-100 nm. [GOC:BHF, GOC:mah, PMID:15908444, PMID:17641064, PMID:19442504, PMID:19498381, PMID:22418571, PMID:24009894]	solute carrier family 25 (mitochondrial carrier; phosphate carrier), member 25
ENST00000452371	TAP2	1.24681e-06	3.38381e-05	2.25584	0.465308	4.46416	4.03546	0.181161	0.793141	0.0398103	0.793141	ENSG00000223481	TAP2	9.54328	GO:0015197	peptide transporter activity	Enables the directed movement of peptides, compounds of two or more amino acids where the alpha carboxyl group of one is bound to the alpha amino group of another, into, out of or within a cell, or between cells. [GOC:ai]	transporter 2, ATP-binding cassette, sub-family B (MDR/TAP)	ATP binding
ENST00000455842	TAP2	1.24681e-06	3.38381e-05	2.25584	0.465308	4.46416	4.03546	0.181161	0.793141	0.0398103	0.793141	ENSG00000225967	TAP2	9.54328	GO:0046980	tapasin binding	Interacting selectively and non-covalently with tapasin, a member of the MHC class I loading complex which bridges the TAP peptide transporter to class I molecules. [PMID:12594855]	transporter 2, ATP-binding cassette, sub-family B (MDR/TAP)	ATP binding
ENST00000409652	APOL6	3.00443e-26	9.1331e-24	2.25524	0.212774	7.47243	1.63273	0.00109351	0.202634	0.0126826	0.202634	ENSG00000221963	APOL6	9.53757	GO:0042157	lipoprotein metabolic process	The chemical reactions and pathways involving any conjugated, water-soluble protein in which the nonprotein group consists of a lipid or lipids. [ISBN:0198506732]	apolipoprotein L, 6
ENST00000265007	SOX30	0.000111492	0.00170764	2.25411	0.583345	1.53196	2.03422	0.825923	-0.0474998	0.705387	0.705387	ENSG00000039600	SOX30	9.52683	GO:0031960	response to corticosteroid	Any process that results in a change in state or activity of a cell or an organism (in terms of movement, secretion, enzyme production, gene expression, etc.) as a result of a corticosteroid hormone stimulus. A corticosteroid is a steroid hormone that is produced in the adrenal cortex. Corticosteroids are involved in a wide range of physiologic systems such as stress response, immune response and…	SRY-box 30
ENST00000407280	IFI30	4.89883e-26	1.47732e-23	2.25373	0.213554	5.39519	1.6634	0.0115697	0.193655	0.0223379	0.193655	ENSG00000216490	IFI30	9.52316				interferon, gamma-inducible protein 30	oxidoreductase activity acting on a sulfur group of donors
ENST00000553486	ABCD4	0.00314782	0.027318	2.25279	0.762902	3.87657	6.50574	1.38586	1.23322	0.073214	1.23322	ENSG00000119688	ABCD4	9.51423	GO:0043190	ATP-binding cassette (ABC) transporter complex	A complex for the transport of metabolites into and out of the cell, typically comprised of four domains; two membrane-associated domains and two ATP-binding domains at the intracellular face of the membrane, that form a central pore through the plasma membrane. Each of the four core domains may be encoded as a separate polypeptide or the domains can be fused in any one of a number of ways into m…	ATP binding cassette subfamily D member 4	Methylmalonic acidemia with homocystinuria type cblJ
ENST00000463022	SP110	1.32611e-05	0.00027388	2.2522	0.517064	1.08752	2.43659	0.168597	1.0345	0.960889	1.0345	ENSG00000135899	SP110	9.50867	GO:0016032	viral process	A multi-organism process in which a virus is a participant. The other participant is the host. Includes infection of a host cell, replication of the viral genome, and assembly of progeny virus particles. In some cases the viral genetic material may integrate into the host genome and only subsequently, under particular circumstances, 'complete' its life cycle. [GOC:bf, GOC:jl, GOC:mah]	SP110 nuclear body protein	Hepatic veno-occlusive disease - immunodeficiency
ENST00000451303	RAB14	0.00102848	0.0110816	2.25016	0.685477	2.98572	4.31841	1.667	0.447449	0.204216	0.447449	ENSG00000119396	RAB14	9.48924	GO:0090387	phagolysosome assembly involved in apoptotic cell clearance	The process in which a phagosome, a vesicle formed by phagocytosis, fuses with a lysosome as a part of apoptotic cell clearance. [GOC:kmv, GOC:tb]	RAB14, member RAS oncogene family
ENST00000622433	MECP2	0.00572507	0.0436578	2.24345	0.811925	2.31748	3.95743	1.86298	1.10352	0.378177	1.10352	ENSG00000169057	MECP2	9.42581	GO:0007626	locomotory behavior	The specific movement from place to place of an organism in response to external or internal stimuli. Locomotion of a whole organism in a manner dependent upon some combination of that organism's internal state and external conditions. [GOC:dph]	methyl-CpG binding protein 2	Atypical Rett syndrome
ENST00000476613	IRF1	3.4045e-07	1.0583e-05	2.24237	0.439719	1.90696	2.03491	0.339578	0.446898	0.530511	0.530511	ENSG00000125347	IRF1	9.41566	GO:2000564	regulation of CD8-positive, alpha-beta T cell proliferation	Any process that modulates the frequency, rate or extent of CD8-positive, alpha-beta T cell proliferation. [GOC:obol]	interferon regulatory factor 1	RNA polymerase II core promoter proximal region sequence-specific DNA binding
ENST00000594009	FLT3LG	0.00103333	0.0111276	2.24223	0.683338	1.36569	3.59731	0.742052	1.35923	0.794375	1.35923	ENSG00000090554	FLT3LG	9.41432	GO:0005125	cytokine activity	Functions to control the survival, growth, differentiation and effector function of tissues and cells. [ISBN:0198599471]	fms-related tyrosine kinase 3 ligand
ENST00000502843	CD38	5.16611e-07	1.5365e-05	2.23886	0.445986	2.13037	8.50648	0.45253	0.10756	0.442534	0.442534	ENSG00000004468	CD38	9.38267	GO:0050135	NAD(P)+ nucleosidase activity	Catalysis of the reaction: NAD(P)+ + H2O = ADP-ribose(P) + nicotinamide. [EC:3.2.2.6, MetaCyc:NADP+-NUCLEOSIDASE-RXN]	CD38 molecule	B cell receptor signaling pathway
ENST00000559916	B2M	1.28534e-06	3.47538e-05	2.238	0.462204	3.87599	2.48863	0.545236	0.416111	0.0732598	0.416111	ENSG00000166710	B2M	9.37453	GO:0005515	protein binding	Interacting selectively and non-covalently with any protein or protein complex (a complex of two or more proteins that may include other nonprotein molecules). [GOC:go_curators]	beta-2-microglobulin	Immunodeficiency by defective expression of HLA class 1
ENST00000517453	PTK2	0.000144942	0.00213736	2.23785	0.588974	1.98121	2.72506	0.703455	0.857553	0.499917	0.857553	ENSG00000169398	PTK2	9.3732	GO:1900024	regulation of substrate adhesion-dependent cell spreading	Any process that modulates the frequency, rate or extent of substrate adhesion-dependent cell spreading. [GOC:TermGenie, GOC:yaf]	protein tyrosine kinase 2	integrin-mediated signaling pathway
ENST00000395048	CYP1A1	0.00149157	0.0150375	2.23681	0.704216	2.25439	3.29544	1.73624	0.495394	0.398962	0.495394	ENSG00000140465	CYP1A1	9.36344	GO:0097267	omega-hydroxylase P450 pathway	The chemical reactions and pathways by which arachidonic acid is converted to other compounds initially by omega-hydroxylation. [GOC:mw, PMID:10681399]	cytochrome P450 family 1 subfamily A member 1
ENST00000490867	RNF121	0.00362577	0.0305234	2.2368	0.768921	1.62518	3.72014	1.57736	1.08322	0.658687	1.08322	ENSG00000137522	RNF121	9.36331	GO:0061630	ubiquitin protein ligase activity	Catalysis of the transfer of ubiquitin to a substrate protein via the reaction X-ubiquitin + S --> X + S-ubiquitin, where X is either an E2 or E3 enzyme, the X-ubiquitin linkage is a thioester bond, and the S-ubiquitin linkage is an isopeptide bond between the C-terminal glycine of ubiquitin and the epsilon-amino group of lysine residues in the substrate. Note that this may include the extension …	ring finger protein 121
ENST00000509583	LAP3	7.29153e-08	2.67402e-06	2.23647	0.415404	1.9839	1.90531	0.277689	0.270041	0.498834	0.498834	ENSG00000002549	LAP3	9.36021	GO:0008235	metalloexopeptidase activity	Catalysis of the hydrolysis of a peptide bond not more than three residues from the N- or C-terminus of a polypeptide chain by a mechanism in which water acts as a nucleophile, one or two metal ions hold the water molecule in place, and charged amino acid side chains are ligands for the metal ions. [GOC:mah, http://merops.sanger.ac.uk/about/glossary.htm#CATTYPE, http://merops.sanger.ac.uk/about/g…	leucine aminopeptidase 3
ENST00000555625	ATP6V1D	0.000146995	0.00216385	2.23605	0.589041	1.42985	2.09553	0.802214	-0.0745131	0.759151	0.759151	ENSG00000100554	ATP6V1D	9.35635	GO:0033176	proton-transporting V-type ATPase complex	A proton-transporting two-sector ATPase complex that couples ATP hydrolysis to the transport of protons across a concentration gradient. The resulting transmembrane electrochemical potential of H+ is used to drive a variety of (i) secondary active transport systems via H+-dependent symporters and antiporters and (ii) channel-mediated transport systems. The complex comprises a membrane sector (V0)…	ATPase, H+ transporting, lysosomal 34kDa, V1 subunit D	cilium assembly
ENST00000460516	UBA7	3.0942e-16	4.18978e-14	2.23574	0.273665	3.62639	1.62535	0.24034	0.0303635	0.0966771	0.0966771	ENSG00000182179	UBA7	9.35336	GO:0019782	ISG15 activating enzyme activity	Catalysis of the activation of the small ubiquitin-related modifier ISG15, through the formation of an ATP-dependent high-energy thiolester bond. [GOC:mah]	ubiquitin-like modifier activating enzyme 7
ENST00000396662	ARL4A	0.000375655	0.00478372	2.23494	0.628388	3.15213	4.24312	1.09031	0.686609	0.171291	0.686609	ENSG00000122644	ARL4A	9.34589	GO:0005515	protein binding	Interacting selectively and non-covalently with any protein or protein complex (a complex of two or more proteins that may include other nonprotein molecules). [GOC:go_curators]	ADP ribosylation factor like GTPase 4A
ENST00000547581	PFKM	0.00178008	0.0172566	2.2325	0.714476	0.963193	3.12094	1.25407	0.226688	1.04307	1.04307	ENSG00000152556	PFKM	9.32312	GO:0005945	6-phosphofructokinase complex	A protein complex that possesses 6-phosphofructokinase activity; homodimeric, homooctameric, and allosteric homotetrameric forms are known. [GOC:mah, GOC:vw, ISBN:0198506732]	phosphofructokinase, muscle	Glycogen storage disease due to muscle phosphofructokinase deficiency
ENST00000562261	KLHDC4	0.00365334	0.0307003	2.23168	0.767787	1.58475	3.81425	1.91135	0.741382	0.678665	0.741382	ENSG00000104731	KLHDC4	9.3155	GO:0005515	protein binding	Interacting selectively and non-covalently with any protein or protein complex (a complex of two or more proteins that may include other nonprotein molecules). [GOC:go_curators]	uncharacterized LOC105371397
ENST00000448695	C16orf62	0.000447875	0.00556511	2.23126	0.635661	0.932772	2.99143	0.313475	1.50482	1.06395	1.50482	ENSG00000103544	C16orf62	9.31158				chromosome 16 open reading frame 62	Golgi to plasma membrane transport
ENST00000521516	HMBOX1	0.00327336	0.0281877	2.22863	0.757823	1.41374	3.13022	1.81644	-0.0555573	0.767888	0.767888	ENSG00000147421	HMBOX1	9.28711				homeobox containing 1	positive regulation of telomerase activity
ENST00000441065	RFPL4B	2.26023e-07	7.38064e-06	2.22652	0.430116	1.8376	1.72106	0.272201	0.113968	0.560298	0.560298	ENSG00000251258	RFPL4B	9.26754	GO:0005515	protein binding	Interacting selectively and non-covalently with any protein or protein complex (a complex of two or more proteins that may include other nonprotein molecules). [GOC:go_curators]	ret finger protein-like 4B
ENST00000262878	SAMHD1	1.56954e-58	2.08427e-55	2.22404	0.137882	8.30197	1.5214	0.000488239	0.0850634	0.0121613	0.0850634	ENSG00000101347	SAMHD1	9.24462	GO:0032567	dGTP binding	Interacting selectively and non-covalently with dGTP, deoxyguanosine triphosphate. [GOC:mah]	SAM domain and HD domain 1	Aicardi-Goutieres Syndrome
ENST00000444035	PDE2A	0.00061707	0.00722473	2.22059	0.648538	3.28908	12.3746	1.14044	0.752269	0.146014	0.752269	ENSG00000186642	PDE2A	9.2128	GO:0097011	cellular response to granulocyte macrophage colony-stimulating factor stimulus	Any process that results in a change in state or activity of a cell (in terms of movement, secretion, enzyme production, gene expression, etc.) as a result of a granulocyte macrophage colony-stimulating factor stimulus. [GOC:BHF, GOC:ebc, PMID:7901744]	phosphodiesterase 2A	cAMP binding
ENST00000354361	SYF2	0.00436827	0.0353633	2.21983	0.778816	2.70708	3.81061	1.57019	1.1593	0.266445	1.1593	ENSG00000117614	SYF2	9.20579	GO:0071014	post-mRNA release spliceosomal complex	A spliceosomal complex that is formed following the release of the spliced product from the post-spliceosomal complex and contains the excised intron and three snRNPs, including U5. [GOC:ab, GOC:krc, GOC:mah, ISBN:0879695897, ISBN:0879697393, PMID:19239890]	SYF2 pre-mRNA-splicing factor
ENST00000581888	RASSF5	0.000222732	0.00307315	2.21914	0.601111	1.60098	2.31559	0.955409	-0.0758986	0.670598	0.670598	ENSG00000266094	RASSF5	9.19943	GO:0005515	protein binding	Interacting selectively and non-covalently with any protein or protein complex (a complex of two or more proteins that may include other nonprotein molecules). [GOC:go_curators]	Ras association (RalGDS/AF-6) domain family member 5
ENST00000624697	ISG15	1.2325e-05	0.00025679	2.21789	0.507323	2.78334	1.9373	0.91022	-0.383585	0.247974	0.247974	ENSG00000187608	ISG15	9.18795	GO:0005515	protein binding	Interacting selectively and non-covalently with any protein or protein complex (a complex of two or more proteins that may include other nonprotein molecules). [GOC:go_curators]	ISG15 ubiquitin-like modifier	Mendelian susceptibility to mycobacterial diseases due to complete ISG15 deficiency
ENST00000465182	BTRC	0.00146144	0.0147956	2.21779	0.696929	2.05438	2.74471	1.71461	-0.261865	0.471085	0.471085	ENSG00000166167	BTRC	9.18702	GO:0045879	negative regulation of smoothened signaling pathway	Any process that stops, prevents, or reduces the frequency, rate or extent of smoothened signaling. [GOC:go_curators]	beta-transducin repeat containing E3 ubiquitin protein ligase	Split hand-split foot malformation
ENST00000379328	GATA3	0.000284043	0.0037693	2.21697	0.610831	1.3711	4.08437	0.550447	1.12857	0.791364	1.12857	ENSG00000107485	GATA3	9.17949	GO:2000734	negative regulation of glial cell-derived neurotrophic factor receptor signaling pathway involved in ureteric bud formation	Any process that stops, prevents or reduces the frequency, rate or extent of glial cell-derived neurotrophic factor receptor signaling pathway involved in ureteric bud formation. [GOC:obol]	GATA binding protein 3	Hypoparathyroidism - deafness - renal disease
ENST00000317216	EGR3	1.65421e-17	2.51936e-15	2.21657	0.260289	5.20836	2.08707	0.0260913	0.278785	0.0239953	0.278785	ENSG00000179388	EGR3	9.17581	GO:0002042	cell migration involved in sprouting angiogenesis	The orderly movement of endothelial cells into the extracellular matrix in order to form new blood vessels involved in sprouting angiogenesis. [PMID:16391003]	early growth response 3	cellular response to fibroblast growth factor stimulus
ENST00000493973	POR	0.00120451	0.0126328	2.21495	0.68409	1.39398	3.27713	0.776632	1.32927	0.778704	1.32927	ENSG00000127948	POR	9.16097	GO:0090346	cellular organofluorine metabolic process	The chemical reactions and pathways involving organofluorine compounds, as carried out by individual cells. [GOC:BHF]	P450 (cytochrome) oxidoreductase	Congenital adrenal hyperplasia due to cytochrome P450 oxidoreductase deficiency
ENST00000495767	MCCC1	0.000325167	0.00422611	2.21269	0.615598	1.65928	2.56004	1.06317	0.36178	0.642153	0.642153	ENSG00000078070	MCCC1	9.14029	GO:0004485	methylcrotonoyl-CoA carboxylase activity	Catalysis of the reaction: 3-methylbut-2-enoyl-CoA + ATP + bicarbonate = trans-3-methylglutaconyl-CoA + ADP + 2 H(+) + phosphate. [EC:6.4.1.4, RHEA:13592]	methylcrotonoyl-CoA carboxylase 1	Isolated 3-methylcrotonyl-CoA carboxylase deficiency
ENST00000588569	BCAS3	2.18837e-14	2.37313e-12	2.21133	0.289477	3.80082	1.60569	0.297661	0.0537269	0.0794254	0.0794254	ENSG00000141376	BCAS3	9.12783	GO:0005730	nucleolus	A small, dense body one or more of which are present in the nucleus of eukaryotic cells. It is rich in RNA and protein, is not bounded by a limiting membrane, and is not seen during mitosis. Its prime function is the transcription of the nucleolar DNA into 45S ribosomal-precursor RNA, the processing of this RNA into 5.8S, 18S, and 28S components of ribosomal RNA, and the association of these comp…	breast carcinoma amplified sequence 3
ENST00000409442	MXD1	4.32146e-06	0.000101806	2.21108	0.481162	1.44773	1.98527	0.292293	0.422664	0.749532	0.749532	ENSG00000059728	MXD1	9.12555	GO:0046983	protein dimerization activity	The formation of a protein dimer, a macromolecular structure consists of two noncovalently associated identical or nonidentical subunits. [ISBN:0198506732]	MAX dimerization protein 1
ENST00000529523	NAT10	3.34935e-05	0.000605065	2.20925	0.532566	1.38513	2.15597	0.492735	0.371541	0.783585	0.783585	ENSG00000135372	NAT10	9.10889	GO:0032211	negative regulation of telomere maintenance via telomerase	Any process that stops, prevents, or reduces the frequency, rate or extent of the addition of telomeric repeats by telomerase. [GOC:mah]	N-acetyltransferase 10 (GCN5-related)	negative regulation of telomere maintenance via telomerase
ENST00000534525	PIDD1	0.000451855	0.00560351	2.20742	0.629293	3.3007	3.80405	1.24568	0.536368	0.143987	0.536368	ENSG00000177595	PIDD1	9.09226				p53-induced death domain protein 1	DNA damage response signal transduction by p53 class mediator resulting in cell cycle arrest
ENST00000428800	LIPA	0.00335745	0.0287093	2.20714	0.752528	1.75902	3.64248	1.00637	1.54197	0.59544	1.54197	ENSG00000107798	LIPA	9.08964	GO:0004771	sterol esterase activity	Catalysis of the reaction: a steryl ester + H2O = a sterol + a fatty acid. [EC:3.1.1.13]	lipase A, lysosomal acid, cholesterol esterase	Cholesteryl ester storage disease
ENST00000354258	TAP1	2.92383e-81	1.05387e-77	2.20662	0.115576	6.57639	1.58884	0.00117845	0.058932	0.0148914	0.058932	ENSG00000168394	TAP1	9.08497	GO:0046967	cytosol to ER transport	The directed movement of substances from the cytosol to the endoplasmic reticulum of a cell. [GOC:ai]	transporter 1, ATP-binding cassette, sub-family B (MDR/TAP)	Immunodeficiency by defective expression of HLA class 1
ENST00000383235	TAP1	2.92383e-81	1.05387e-77	2.20662	0.115576	6.57639	1.58884	0.00117845	0.058932	0.0148914	0.058932	ENSG00000206297	TAP1	9.08497	GO:0046967	cytosol to ER transport	The directed movement of substances from the cytosol to the endoplasmic reticulum of a cell. [GOC:ai]	transporter 1, ATP-binding cassette, sub-family B (MDR/TAP)	ATP binding
ENST00000414467	TAP1	2.92383e-81	1.05387e-77	2.20662	0.115576	6.57639	1.58884	0.00117845	0.058932	0.0148914	0.058932	ENSG00000226173	TAP1	9.08497	GO:0046967	cytosol to ER transport	The directed movement of substances from the cytosol to the endoplasmic reticulum of a cell. [GOC:ai]	transporter 1, ATP-binding cassette, sub-family B (MDR/TAP)	ATP binding
ENST00000418205	TAP1	2.92383e-81	1.05387e-77	2.20662	0.115576	6.57639	1.58884	0.00117845	0.058932	0.0148914	0.058932	ENSG00000227816	TAP1	9.08497	GO:0046967	cytosol to ER transport	The directed movement of substances from the cytosol to the endoplasmic reticulum of a cell. [GOC:ai]	transporter 1, ATP-binding cassette, sub-family B (MDR/TAP)	ATP binding
ENST00000424897	TAP1	2.92383e-81	1.05387e-77	2.20662	0.115576	6.57639	1.58884	0.00117845	0.058932	0.0148914	0.058932	ENSG00000230705	TAP1	9.08497	GO:0046967	cytosol to ER transport	The directed movement of substances from the cytosol to the endoplasmic reticulum of a cell. [GOC:ai]	transporter 1, ATP-binding cassette, sub-family B (MDR/TAP)	ATP binding
ENST00000440894	TAP1	2.92383e-81	1.05387e-77	2.20662	0.115576	6.57639	1.58884	0.00117845	0.058932	0.0148914	0.058932	ENSG00000232367	TAP1	9.08497	GO:0046967	cytosol to ER transport	The directed movement of substances from the cytosol to the endoplasmic reticulum of a cell. [GOC:ai]	transporter 1, ATP-binding cassette, sub-family B (MDR/TAP)	ATP binding
ENST00000465662	MCHR1	7.36926e-05	0.00119828	2.20659	0.556652	1.26079	2.19364	0.539897	0.305503	0.854478	0.854478	ENSG00000128285	MCHR1	9.08467	GO:0008188	neuropeptide receptor activity	Combining with a neuropeptide to initiate a change in cell activity. [GOC:ai]	melanin concentrating hormone receptor 1
ENST00000303562	FOS	5.00903e-08	1.89894e-06	2.20396	0.404323	6.58936	3.3699	0.036245	0.699403	0.0148494	0.699403	ENSG00000170345	FOS	9.06085	GO:0034614	cellular response to reactive oxygen species	Any process that results in a change in state or activity of a cell (in terms of movement, secretion, enzyme production, gene expression, etc.) as a result of a reactive oxygen species stimulus. Reactive oxygen species include singlet oxygen, superoxide, and oxygen free radicals. [GOC:mah]	FBJ murine osteosarcoma viral oncogene homolog	Berardinelli-Seip congenital lipodystrophy
ENST00000484560	PLSCR1	1.25287e-12	1.06435e-10	2.20233	0.310213	2.85646	1.73672	0.201747	-0.00486216	0.231298	0.231298	ENSG00000188313	PLSCR1	9.04607	GO:2000373	positive regulation of DNA topoisomerase (ATP-hydrolyzing) activity	Any process that activates or increases the frequency, rate or extent of DNA topoisomerase (ATP-hydrolyzing) activity. [GOC:mah]	phospholipid scramblase 1	defense response to virus
ENST00000527160	IRF7	9.21422e-10	4.96054e-08	2.19894	0.359159	2.67249	1.40606	0.30529	-0.183644	0.27519	0.27519	ENSG00000185507	IRF7	9.01543	GO:0005515	protein binding	Interacting selectively and non-covalently with any protein or protein complex (a complex of two or more proteins that may include other nonprotein molecules). [GOC:go_curators]	interferon regulatory factor 7	DNA binding
ENST00000505634	DCUN1D4	0.00015712	0.00228797	2.19633	0.58111	2.21745	2.3858	1.10805	0.0129451	0.411551	0.411551	ENSG00000109184	DCUN1D4	8.99192				DCN1, defective in cullin neddylation 1, domain containing 4
ENST00000595826	NAPA	1.46566e-05	0.000299192	2.19389	0.506228	1.59586	1.98018	0.480069	0.278104	0.673134	0.673134	ENSG00000105402	NAPA	8.97	GO:0035494	SNARE complex disassembly	The disaggregation of the SNARE protein complex into its constituent components. The SNARE complex is a protein complex involved in membrane fusion; a stable ternary complex consisting of a four-helix bundle, usually formed from one R-SNARE and three Q-SNAREs with an ionic layer sandwiched between hydrophobic layers. [GOC:rb, PMID:11697877]	N-ethylmaleimide-sensitive factor attachment protein, alpha
ENST00000508576	HOMER1	0.00107132	0.0114682	2.19312	0.670455	1.80514	3.44874	1.0381	0.984699	0.574637	0.984699	ENSG00000152413	HOMER1	8.96315	GO:2001257	regulation of cation channel activity	Any process that modulates the frequency, rate or extent of cation channel activity. [GOC:BHF]	homer scaffolding protein 1
ENST00000612499	IFI27	4.17332e-18	6.83747e-16	2.19213	0.252725	3.79491	1.55739	0.0243753	0.263039	0.0799312	0.263039	ENSG00000165949	IFI27	8.95423	GO:0016021	integral component of membrane	The component of a membrane consisting of the gene products and protein complexes having at least some part of their peptide sequence embedded in the hydrophobic region of the membrane. [GOC:dos, GOC:go_curators]	interferon, alpha-inducible protein 27
ENST00000626577	IFI27	4.17332e-18	6.83747e-16	2.19213	0.252725	3.79491	1.55739	0.0243753	0.263039	0.0799312	0.263039	ENSG00000275214	IFI27	8.95423	GO:0016021	integral component of membrane	The component of a membrane consisting of the gene products and protein complexes having at least some part of their peptide sequence embedded in the hydrophobic region of the membrane. [GOC:dos, GOC:go_curators]	interferon, alpha-inducible protein 27
ENST00000460510	FAS	4.70371e-06	0.000109685	2.19201	0.478857	1.58958	2.36863	0.355611	0.571556	0.676255	0.676255	ENSG00000026103	FAS	8.95317	GO:0031265	CD95 death-inducing signaling complex	A protein complex formed upon binding of Fas/CD95/APO-1 to its ligand. The complex includes FADD/Mort1, procaspase-8/10 and c-FLIP in addition to the ligand-bound receptor. [PMID:12628743, PMID:12655293]	Fas cell surface death receptor	AUTOIMMUNE LYMPHOPROLIFERATIVE SYNDROME
ENST00000528963	PARP10	2.9348e-18	4.90384e-16	2.19177	0.251524	3.64359	1.49627	0.189964	0.0610633	0.0947265	0.0947265	ENSG00000178685	PARP10	8.95103	GO:0005794	Golgi apparatus	A compound membranous cytoplasmic organelle of eukaryotic cells, consisting of flattened, ribosome-free vesicles arranged in a more or less regular stack. The Golgi apparatus differs from the endoplasmic reticulum in often having slightly thicker membranes, appearing in sections as a characteristic shallow semicircle so that the convex side (cis or entry face) abuts the endoplasmic reticulum, sec…	poly(ADP-ribose) polymerase family member 10	K63-linked polyubiquitin binding
ENST00000476767	MED15	5.01483e-05	0.000860352	2.18814	0.539624	1.14531	2.03452	0.386004	0.4834	0.924372	0.924372	ENSG00000099917	MED15	8.91863	GO:0016592	mediator complex	A protein complex that interacts with the carboxy-terminal domain of the largest subunit of RNA polymerase II and plays an active role in transducing the signal from a transcription factor to the transcriptional machinery. The mediator complex is required for activation of transcription of most protein-coding genes, but can also act as a transcriptional corepressor. The Saccharomyces complex cont…	mediator complex subunit 15
ENST00000577628	LIPG	4.94138e-05	0.000849098	2.18716	0.538925	2.82754	4.62698	0.115054	1.19193	0.237774	1.19193	ENSG00000101670	LIPG	8.90991	GO:0004465	lipoprotein lipase activity	Catalysis of the reaction: triacylglycerol + H2O = diacylglycerol + a carboxylate, where the triacylglycerol is part of a lipoprotein. [EC:3.1.1.34, GOC:bf]	lipase, endothelial	cholesterol homeostasis
ENST00000329464	TRIM69	1.3622e-10	8.46541e-09	2.18626	0.340535	4.27067	2.06251	0.473621	-0.0237397	0.0482187	0.0482187	ENSG00000185880	TRIM69	8.90184	GO:0016607	nuclear speck	A discrete extra-nucleolar subnuclear domain, 20-50 in number, in which splicing factors are seen to be localized by immunofluorescence microscopy. [http://www.cellnucleus.com/]	tripartite motif containing 69
ENST00000506698	BTN3A1	3.01934e-06	7.42987e-05	2.18599	0.468143	2.54373	2.22993	0.594029	0.392179	0.309764	0.392179	ENSG00000026950	BTN3A1	8.89947	GO:0072643	interferon-gamma secretion	The regulated release of interferon-gamma from a cell. [GOC:BHF, GOC:mah, PMID:15546383]	butyrophilin subfamily 3 member A1	activated T cell proliferation
ENST00000313771	FAS	0.000415913	0.00522172	2.18513	0.619056	1.03998	2.67849	0.732817	0.759548	0.99172	0.99172	ENSG00000026103	FAS	8.89179	GO:0031265	CD95 death-inducing signaling complex	A protein complex formed upon binding of Fas/CD95/APO-1 to its ligand. The complex includes FADD/Mort1, procaspase-8/10 and c-FLIP in addition to the ligand-bound receptor. [PMID:12628743, PMID:12655293]	Fas cell surface death receptor	AUTOIMMUNE LYMPHOPROLIFERATIVE SYNDROME
ENST00000475385	SLC46A3	0.000236167	0.00322908	2.18346	0.593846	1.51178	2.66292	0.680944	0.905995	0.71579	0.905995	ENSG00000139508	SLC46A3	8.87697	GO:0070062	extracellular exosome	A membrane-bounded vesicle that is released into the extracellular region by fusion of the limiting endosomal membrane of a multivesicular body with the plasma membrane. Extracellular exosomes, also simply called exosomes, have a diameter of about 40-100 nm. [GOC:BHF, GOC:mah, PMID:15908444, PMID:17641064, PMID:19442504, PMID:19498381, PMID:22418571, PMID:24009894]	solute carrier family 46 member 3
ENST00000493944	ZDHHC4	0.00176775	0.0171707	2.18216	0.697909	1.0678	2.97681	1.21826	0.643895	0.973586	0.973586	ENSG00000136247	ZDHHC4	8.86541	GO:0019706	protein-cysteine S-palmitoyltransferase activity	Catalysis of the transfer of a palmitoyl group to a sulfur atom on the cysteine of a protein molecule. [EC:2.3.1.225, GOC:ai, GOC:pr]	zinc finger, DHHC-type containing 4
ENST00000415527	SRSF7	1.10776e-06	3.04798e-05	2.18194	0.447903	1.87916	2.06628	0.271629	0.631149	0.542309	0.631149	ENSG00000115875	SRSF7	8.86352	GO:0006369	termination of RNA polymerase II transcription	The process in which the synthesis of an RNA molecule by RNA polymerase II using a DNA template is completed. [GOC:mah, GOC:txnOH]	serine/arginine-rich splicing factor 7
ENST00000305454	C8orf46	0.000260397	0.00350904	2.18176	0.597447	3.89984	3.47862	0.579992	1.02625	0.0714042	1.02625	ENSG00000169085	C8orf46	8.86192				chromosome 8 open reading frame 46
ENST00000532086	IL32	0.000231152	0.0031691	2.18145	0.592417	1.36353	2.29059	0.783725	0.110481	0.795585	0.795585	ENSG00000008517	IL32	8.85913	GO:0006952	defense response	Reactions, triggered in response to the presence of a foreign body or the occurrence of an injury, which result in restriction of damage to the organism attacked or prevention/recovery from the infection caused by the attack. [GOC:go_curators]	interleukin 32
ENST00000426644	HLA-DOB	0.000694538	0.00797024	2.18026	0.642818	1.1246	1.80962	0.922126	-0.297297	0.937342	0.937342	ENSG00000243612	HLA-DOB	8.84863				major histocompatibility complex, class II, DO beta
ENST00000456406	HLA-DOB	0.000694538	0.00797024	2.18026	0.642818	1.1246	1.80962	0.922126	-0.297297	0.937342	0.937342	ENSG00000239457	HLA-DOB	8.84863	GO:0019882	antigen processing and presentation	The process in which an antigen-presenting cell expresses antigen (peptide or lipid) on its cell surface in association with an MHC protein complex. [GO_REF:0000022, GOC:add, GOC:mtg_15nov05, ISBN:0781735149, PMID:15771591, PMID:15928678]	major histocompatibility complex, class II, DO beta
ENST00000302177	FOXA3	1.29319e-07	4.48399e-06	2.17766	0.412451	1.76284	2.36586	0.119904	0.645616	0.593697	0.645616	ENSG00000170608	FOXA3	8.82564	GO:0019904	protein domain specific binding	Interacting selectively and non-covalently with a specific domain of a protein. [GOC:go_curators]	forkhead box A3	positive regulation of transcription regulatory region DNA binding
ENST00000440087	XXbac-BPG181B23.6	1.68422e-09	8.63712e-08	2.17598	0.36112	2.20032	2.8885	0.169336	0.379745	0.417498	0.417498	ENSG00000233902	XXbac-BPG181B23.6	8.81085
ENST00000571908	RNF213	0.000471804	0.00581083	2.17441	0.621922	3.28686	2.82756	0.363766	1.37677	0.146404	1.37677	ENSG00000173821	RNF213	8.79699	GO:0005515	protein binding	Interacting selectively and non-covalently with any protein or protein complex (a complex of two or more proteins that may include other nonprotein molecules). [GOC:go_curators]	ring finger protein 213	Moyamoya disease
ENST00000522407	ENY2	0.00168789	0.016561	2.17375	0.692218	2.47752	3.71258	1.32133	0.834913	0.328781	0.834913	ENSG00000120533	ENY2	8.79122				enhancer of yellow 2 homolog (Drosophila)
ENST00000243347	TNFAIP6	4.94722e-10	2.76975e-08	2.17358	0.349407	3.42432	2.10657	0.15098	0.398402	0.123777	0.398402	ENSG00000123610	TNFAIP6	8.78967	GO:0007267	cell-cell signaling	Any process that mediates the transfer of information from one cell to another. [GOC:mah]	TNF alpha induced protein 6
ENST00000472843	RMND5A	2.77973e-05	0.000515828	2.17342	0.518616	2.80382	2.54458	0.893838	0.316494	0.243202	0.316494	ENSG00000153561	RMND5A	8.78826	GO:0005515	protein binding	Interacting selectively and non-covalently with any protein or protein complex (a complex of two or more proteins that may include other nonprotein molecules). [GOC:go_curators]	required for meiotic nuclear division 5 homolog A
ENST00000417689	CES2	0.00636256	0.0475187	2.17275	0.796321	4.49057	4.79923	2.12408	0.729494	0.0388297	0.729494	ENSG00000172831	CES2	8.7824	GO:0047374	methylumbelliferyl-acetate deacetylase activity	Catalysis of the reaction: 4-methylumbelliferyl acetate + H(2)O = 4-methylumbelliferone + acetate + H(+). [EC:3.1.1.56, RHEA:12211]	carboxylesterase 2
ENST00000373734	DSN1	0.000284129	0.00376978	2.17251	0.598593	2.19574	3.58712	1.19331	0.048645	0.419101	0.419101	ENSG00000149636	DSN1	8.78026	GO:0000444	MIS12/MIND type complex	A multiprotein kinetochore subcomplex that binds to centromeric chromatin and forms part of the inner kinetochore. It helps to recruit outer kinetochore subunits that will bind to microtubules. In humans, it consists of MIS12, DSN1, NSL1 and PMF1. [GOC:krc, PMID:14633972, PMID:16585270]	DSN1 homolog, MIS12 kinetochore complex component
ENST00000526007	PARP10	6.18114e-21	1.32917e-18	2.17088	0.231268	4.28872	1.48213	0.0464571	0.194225	0.0473381	0.194225	ENSG00000178685	PARP10	8.76602	GO:0005794	Golgi apparatus	A compound membranous cytoplasmic organelle of eukaryotic cells, consisting of flattened, ribosome-free vesicles arranged in a more or less regular stack. The Golgi apparatus differs from the endoplasmic reticulum in often having slightly thicker membranes, appearing in sections as a characteristic shallow semicircle so that the convex side (cis or entry face) abuts the endoplasmic reticulum, sec…	poly(ADP-ribose) polymerase family member 10	K63-linked polyubiquitin binding
ENST00000442452	ACHE	7.23457e-05	0.00118043	2.17058	0.54696	1.55596	2.36898	0.653094	0.58911	0.693149	0.693149	ENSG00000087085	ACHE	8.76333	GO:0043083	synaptic cleft	The narrow gap that separates the presynaptic and postsynaptic membranes, into which neurotransmitter is released. [GOC:jl, http://synapses.mcg.edu/anatomy/chemical/synapse.stm]	acetylcholinesterase (Yt blood group)	acetylcholinesterase activity
ENST00000373417	ANGPTL2	0.00397187	0.0327748	2.16981	0.753305	4.3708	4.34181	1.40489	1.14873	0.0435891	1.14873	ENSG00000136859	ANGPTL2	8.75663	GO:0070062	extracellular exosome	A membrane-bounded vesicle that is released into the extracellular region by fusion of the limiting endosomal membrane of a multivesicular body with the plasma membrane. Extracellular exosomes, also simply called exosomes, have a diameter of about 40-100 nm. [GOC:BHF, GOC:mah, PMID:15908444, PMID:17641064, PMID:19442504, PMID:19498381, PMID:22418571, PMID:24009894]	angiopoietin like 2
ENST00000368924	DDO	1.04086e-06	2.87435e-05	2.16937	0.444201	2.23579	7.20571	0.482658	0.248619	0.405258	0.405258	ENSG00000203797	DDO	8.75276	GO:0008445	D-aspartate oxidase activity	Catalysis of the reaction: D-aspartate + H2O + O2 = oxaloacetate + NH3 + hydrogen peroxide. [EC:1.4.3.1]	D-aspartate oxidase
ENST00000556293	PNP	8.77387e-14	8.70407e-12	2.16913	0.290839	2.87034	1.7576	0.152399	-0.0719847	0.228244	0.228244	ENSG00000198805	PNP	8.75063	GO:0009116	nucleoside metabolic process	The chemical reactions and pathways involving a nucleoside, a nucleobase linked to either beta-D-ribofuranose (a ribonucleoside) or 2-deoxy-beta-D-ribofuranose, (a deoxyribonucleoside), e.g. adenosine, guanosine, inosine, cytidine, uridine and deoxyadenosine, deoxyguanosine, deoxycytidine and thymidine (= deoxythymidine). [GOC:ma]	purine nucleoside phosphorylase	PURINE NUCLEOSIDE PHOSPHORYLASE DEFICIENCY
ENST00000298530	TMEM52B	0.000116442	0.00177198	2.16844	0.562721	1.50005	2.14826	0.703054	0.152665	0.721891	0.721891	ENSG00000165685	TMEM52B	8.74466	GO:0070062	extracellular exosome	A membrane-bounded vesicle that is released into the extracellular region by fusion of the limiting endosomal membrane of a multivesicular body with the plasma membrane. Extracellular exosomes, also simply called exosomes, have a diameter of about 40-100 nm. [GOC:BHF, GOC:mah, PMID:15908444, PMID:17641064, PMID:19442504, PMID:19498381, PMID:22418571, PMID:24009894]	transmembrane protein 52B
ENST00000557746	MAX	3.80666e-05	0.00067622	2.16742	0.526212	1.37959	2.11808	0.459395	0.457851	0.78665	0.78665	ENSG00000125952	MAX	8.73572	GO:0071339	MLL1 complex	A protein complex that can methylate lysine-4 of histone H3. MLL1/MLL is the catalytic methyltransferase subunit, and the complex also contains the core components ASH2L, HCFC1/HCF1 WDR5 and RBBP5. [GOC:sp, PMID:15960975]	MYC associated factor X	Hereditary pheochromocytoma-paraganglioma
ENST00000221485	SLC17A7	3.30544e-06	8.05077e-05	2.16707	0.46595	1.67773	2.53272	0.184042	0.792952	0.633329	0.792952	ENSG00000104888	SLC17A7	8.73268	GO:0015319	sodium:inorganic phosphate symporter activity	Catalysis of the transfer of a solute or solutes from one side of a membrane to the other according to the reaction: Na+(out) + inorganic phosphate(out) = Na+(in) + inorganic phosphate(in). [TC:2.A.1.14.6]	solute carrier family 17 (vesicular glutamate transporter), member 7
ENST00000560589	TLE3	0.00291891	0.0257177	2.16615	0.727836	1.74732	3.38202	0.897548	1.48631	0.600796	1.48631	ENSG00000140332	TLE3	8.72463	GO:0009887	organ morphogenesis	Morphogenesis of an organ. An organ is defined as a tissue or set of tissues that work together to perform a specific function or functions. Morphogenesis is the process in which anatomical structures are generated and organized. Organs are commonly observed as visibly distinct structures, but may also exist as loosely associated clusters of cells that work together to perform a specific function…	transducin like enhancer of split 3
ENST00000509645	CAMK4	0.000651911	0.00754743	2.16525	0.635149	1.33547	2.91025	0.702042	1.11332	0.811367	1.11332	ENSG00000152495	CAMK4	8.71679	GO:0006468	protein phosphorylation	The process of introducing a phosphate group on to a protein. [GOC:hb]	calcium/calmodulin-dependent protein kinase IV	myeloid dendritic cell differentiation
ENST00000377806	CEACAM1	0.000401834	0.00506428	2.16476	0.611709	1.2511	2.75054	0.823654	0.840434	0.860189	0.860189	ENSG00000079385	CEACAM1	8.71252	GO:0050900	leukocyte migration	The movement of a leukocyte within or between different tissues and organs of the body. [GOC:add, ISBN:0781735149, PMID:14680625, PMID:14708592, PMID:7507411, PMID:8600538]	carcinoembryonic antigen-related cell adhesion molecule 1 (biliary glycoprotein)	positive regulation of protein homodimerization activity
ENST00000474904	GPATCH4	4.68139e-05	0.000811052	2.16378	0.531513	1.29959	1.87486	0.439397	0.257942	0.831881	0.831881	ENSG00000160818	GPATCH4	8.70401	GO:0003676	nucleic acid binding	Interacting selectively and non-covalently with any nucleic acid. [GOC:jl]	G-patch domain containing 4
ENST00000461391	NRG4	0.00161004	0.0159571	2.16233	0.685564	1.18402	3.06366	1.2145	0.499037	0.900494	0.900494	ENSG00000169752	NRG4	8.69133	GO:0048513	animal organ development	Development of a tissue or tissues that work together to perform a specific function or functions. Development pertains to the process whose specific outcome is the progression of a structure over time, from its formation to the mature structure. Organs are commonly observed as visibly distinct structures, but may also exist as loosely associated clusters of cells that work together to perform a …	neuregulin 4
ENST00000311812	SNX31	1.45488e-05	0.000297232	2.16046	0.49833	1.24186	2.05579	0.251834	0.644357	0.865663	0.865663	ENSG00000174226	SNX31	8.67517	GO:1990126	retrograde transport, endosome to plasma membrane	The directed movement of membrane-bounded vesicles from endosomes back to the plasma membrane, a trafficking pathway that promotes the recycling of internalized transmembrane proteins. [PMID:23563491]	sorting nexin 31
ENST00000367558	RGS16	1.95093e-19	3.6194e-17	2.16037	0.239616	4.87246	1.75881	0.0123896	0.245981	0.0285241	0.245981	ENSG00000143333	RGS16	8.67438	GO:0009968	negative regulation of signal transduction	Any process that stops, prevents, or reduces the frequency, rate or extent of signal transduction. [GOC:sm]	regulator of G-protein signaling 16
ENST00000529772	CARS	0.00365159	0.0306906	2.16033	0.743203	1.71849	3.45519	1.19156	1.29401	0.614136	1.29401	ENSG00000110619	CARS	8.67404	GO:0006423	cysteinyl-tRNA aminoacylation	The process of coupling cysteine to cysteinyl-tRNA, catalyzed by cysteinyl-tRNA synthetase. In tRNA aminoacylation, the amino acid is first activated by linkage to AMP and then transferred to either the 2'- or the 3'-hydroxyl group of the 3'-adenosine residue of the tRNA. [GOC:mcc, ISBN:0716730510]	cysteinyl-tRNA synthetase	Inflammatory myofibroblastic tumor
ENST00000498261	CD274	9.33805e-06	0.000201489	2.16009	0.487389	2.01549	2.09402	0.582718	-0.0560135	0.486247	0.486247	ENSG00000120217	CD274	8.67189	GO:1903556	negative regulation of tumor necrosis factor superfamily cytokine production	Any process that stops, prevents or reduces the frequency, rate or extent of tumor necrosis factor superfamily cytokine production. [GO_REF:0000058, GOC:TermGenie, PMID:24187568]	CD274 molecule	negative regulation of activated T cell proliferation
ENST00000536708	CDK5RAP3	0.00635994	0.0475038	2.15857	0.791085	2.26394	3.80805	1.68629	1.12988	0.395759	1.12988	ENSG00000108465	CDK5RAP3	8.65877				CDK5 regulatory subunit associated protein 3	apoptotic nuclear changes
ENST00000407583	GPN1	0.00656028	0.0486783	2.1572	0.79356	1.14853	3.84576	1.60505	1.22877	0.922372	1.22877	ENSG00000198522	GPN1	8.64686	GO:0005515	protein binding	Interacting selectively and non-covalently with any protein or protein complex (a complex of two or more proteins that may include other nonprotein molecules). [GOC:go_curators]	GPN-loop GTPase 1
ENST00000367995	ADAMTS4	0.000338427	0.00436695	2.15569	0.601482	1.29689	3.67142	0.79458	0.615368	0.833434	0.833434	ENSG00000158859	ADAMTS4	8.63382	GO:0002020	protease binding	Interacting selectively and non-covalently with any protease or peptidase. [GOC:hjd]	ADAM metallopeptidase with thrombospondin type 1 motif 4
ENST00000580437	SECTM1	0.00234031	0.0214669	2.1546	0.70799	2.23432	3.40766	0.786049	1.46958	0.40576	1.46958	ENSG00000141574	SECTM1	8.62442	GO:0007498	mesoderm development	The process whose specific outcome is the progression of the mesoderm over time, from its formation to the mature structure. The mesoderm is the middle germ layer that develops into muscle, bone, cartilage, blood and connective tissue. [GOC:dph, GOC:tb]	secreted and transmembrane 1	positive regulation of I-kappaB kinase/NF-kappaB signaling
ENST00000563064	ATP6V0D1	0.000821318	0.00917339	2.15345	0.643684	1.51212	2.54172	1.14886	0.299667	0.715615	0.715615	ENSG00000159720	ATP6V0D1	8.61453	GO:0090382	phagosome maturation	A process that is carried out at the cellular level which results in the arrangement of constituent parts of a phagosome within a cell. Phagosome maturation begins with endocytosis and formation of the early phagosome and ends with the formation of the hybrid organelle, the phagolysosome. [GOC:kmv, GOC:tb]	ATPase, H+ transporting, lysosomal 38kDa, V0 subunit d1
ENST00000590577	HMHA1	3.91467e-05	0.000692968	2.15053	0.52293	1.6996	2.17489	0.607569	0.43467	0.622982	0.622982	ENSG00000180448	HMHA1	8.58939	GO:0005515	protein binding	Interacting selectively and non-covalently with any protein or protein complex (a complex of two or more proteins that may include other nonprotein molecules). [GOC:go_curators]	histocompatibility (minor) HA-1
ENST00000529194	APOL2	3.62062e-09	1.74707e-07	2.15021	0.364403	4.08699	1.53909	0.539121	-0.323275	0.0584305	0.0584305	ENSG00000128335	APOL2	8.58669	GO:0008035	high-density lipoprotein particle binding	Interacting selectively and non-covalently with high-density lipoprotein particle, a lipoprotein particle with a high density (typically 1.063-1.21 g/ml) and a diameter of 5-10 nm that contains APOAs and may contain APOCs and APOE. [GOC:mah]	apolipoprotein L, 2
ENST00000008180	IL32	2.91002e-05	0.000536063	2.14992	0.514286	2.04768	2.08743	0.716536	0.218443	0.473671	0.473671	ENSG00000008517	IL32	8.58418	GO:0006952	defense response	Reactions, triggered in response to the presence of a foreign body or the occurrence of an injury, which result in restriction of damage to the organism attacked or prevention/recovery from the infection caused by the attack. [GOC:go_curators]	interleukin 32
ENST00000523949	BNIP3L	0.00370756	0.0310404	2.14756	0.74002	2.56363	3.47267	0.961885	1.50245	0.304211	1.50245	ENSG00000104765	BNIP3L	8.56391	GO:0035694	mitochondrial protein catabolic process	The chemical reactions and pathways resulting in the breakdown of a mitochondrial protein. This process is necessary to maintain the healthy state of mitochondria and is thought to occur via the induction of an intramitochondrial lysosome-like organelle that acts to eliminate the damaged oxidised mitochondrial proteins without destroying the mitochondrial structure. [GOC:sp, PMID:21264221, PMID:2…	BCL2/adenovirus E1B 19kDa interacting protein 3-like	mitochondrial outer membrane
ENST00000560442	TRIM69	1.21184e-05	0.000253042	2.1474	0.490784	2.94833	2.44989	0.756076	0.327835	0.21175	0.327835	ENSG00000185880	TRIM69	8.56257	GO:0016607	nuclear speck	A discrete extra-nucleolar subnuclear domain, 20-50 in number, in which splicing factors are seen to be localized by immunofluorescence microscopy. [http://www.cellnucleus.com/]	tripartite motif containing 69
ENST00000353479	COL17A1	1.80638e-05	0.000358779	2.1467	0.500679	3.05907	2.38889	0.668535	0.459521	0.189547	0.459521	ENSG00000065618	COL17A1	8.55653	GO:0030056	hemidesmosome	A cell-substrate junction (attachment structure) found in epithelial cells that links intermediate filaments to extracellular matrices via transmembrane complexes. In vertebrates, hemidesmosomes mediate contact between the basal side of epithelial cells and the basal lamina. In C. elegans, hemidesmosomes connect epithelial cells to distinct extracellular matrices on both the apical and basal cell…	collagen, type XVII, alpha 1	Epithelial recurrent erosion dystrophy
ENST00000610895	ZBTB10	0.00196198	0.0186615	2.14662	0.693368	3.75593	3.14707	1.08847	1.07495	0.0833549	1.07495	ENSG00000205189	ZBTB10	8.55587	GO:0005515	protein binding	Interacting selectively and non-covalently with any protein or protein complex (a complex of two or more proteins that may include other nonprotein molecules). [GOC:go_curators]	zinc finger and BTB domain containing 10
ENST00000595564	PAF1	0.000143199	0.0021162	2.14632	0.564438	1.8109	2.50331	0.858167	0.57549	0.572076	0.57549	ENSG00000006712	PAF1	8.55331	GO:0001711	endodermal cell fate commitment	The cell differentiation process that results in commitment of a cell to become part of the endoderm. [GOC:go_curators, ISBN:0878932437]	PAF1 homolog, Paf1/RNA polymerase II complex component	mRNA polyadenylation
ENST00000444255	ANGPTL1	1.44657e-05	0.000295932	2.14606	0.494862	1.67261	1.72871	0.46623	0.106841	0.635769	0.635769	ENSG00000116194	ANGPTL1	8.55106	GO:0070062	extracellular exosome	A membrane-bounded vesicle that is released into the extracellular region by fusion of the limiting endosomal membrane of a multivesicular body with the plasma membrane. Extracellular exosomes, also simply called exosomes, have a diameter of about 40-100 nm. [GOC:BHF, GOC:mah, PMID:15908444, PMID:17641064, PMID:19442504, PMID:19498381, PMID:22418571, PMID:24009894]	angiopoietin like 1
ENST00000440567	TLE3	0.00227536	0.0209907	2.14478	0.70281	1.22515	4.07289	1.31352	0.909222	0.875623	0.909222	ENSG00000140332	TLE3	8.54015	GO:0009887	organ morphogenesis	Morphogenesis of an organ. An organ is defined as a tissue or set of tissues that work together to perform a specific function or functions. Morphogenesis is the process in which anatomical structures are generated and organized. Organs are commonly observed as visibly distinct structures, but may also exist as loosely associated clusters of cells that work together to perform a specific function…	transducin like enhancer of split 3
ENST00000561183	NIPA1	0.000933351	0.0102255	2.14468	0.647963	3.53668	2.91763	0.457234	1.43212	0.10776	1.43212	ENSG00000170113	NIPA1	8.53933	GO:1903830	magnesium ion transmembrane transport	The directed movement of magnesium ion across a membrane. [GO_REF:0000069, GOC:TermGenie, PMID:11254124]	non imprinted in Prader-Willi/Angelman syndrome 1	Autosomal dominant spastic paraplegia type 6
ENST00000478688	UBA7	1.21219e-13	1.17183e-11	2.14452	0.289197	3.53935	1.62559	0.137411	0.238946	0.107408	0.238946	ENSG00000182179	UBA7	8.53798	GO:0019782	ISG15 activating enzyme activity	Catalysis of the activation of the small ubiquitin-related modifier ISG15, through the formation of an ATP-dependent high-energy thiolester bond. [GOC:mah]	ubiquitin-like modifier activating enzyme 7
ENST00000508906	BTN3A2	0.0023466	0.021509	2.14421	0.704765	5.73851	3.38142	0.66524	1.56988	0.0196609	1.56988	ENSG00000186470	BTN3A2	8.53533	GO:0072643	interferon-gamma secretion	The regulated release of interferon-gamma from a cell. [GOC:BHF, GOC:mah, PMID:15546383]	butyrophilin subfamily 3 member A2	T cell mediated immunity
ENST00000380671	LCA5L	0.00130506	0.0134638	2.14385	0.666856	1.35065	2.1836	1.19833	-0.123421	0.802804	0.802804	ENSG00000157578	LCA5L	8.53225	GO:0005515	protein binding	Interacting selectively and non-covalently with any protein or protein complex (a complex of two or more proteins that may include other nonprotein molecules). [GOC:go_curators]	Leber congenital amaurosis 5-like
ENST00000525048	NPEPPS	2.66742e-06	6.67235e-05	2.1433	0.456516	1.84663	1.99729	0.381476	0.349476	0.556356	0.556356	ENSG00000141279	NPEPPS	8.5275	GO:0008237	metallopeptidase activity	Catalysis of the hydrolysis of peptide bonds by a mechanism in which water acts as a nucleophile, one or two metal ions hold the water molecule in place, and charged amino acid side chains are ligands for the metal ions. [GOC:mah, http://merops.sanger.ac.uk/about/glossary.htm#CATTYPE]	aminopeptidase puromycin sensitive	positive regulation of protein targeting to mitochondrion
ENST00000444207	FBXO7	8.49851e-06	0.000185704	2.14324	0.481386	1.34205	2.08781	0.235148	0.677868	0.80765	0.80765	ENSG00000100225	FBXO7	8.52702	GO:0031647	regulation of protein stability	Any process that affects the structure and integrity of a protein, altering the likelihood of its degradation or aggregation. [GOC:dph, GOC:mah, GOC:tb]	F-box protein 7	Parkinsonian-pyramidal syndrome
ENST00000538759	RP11-709A23.2	1.61799e-05	0.000326274	2.14155	0.496651	1.17316	1.75344	0.202831	0.124674	0.907147	0.907147	ENSG00000256056	RP11-709A23.2	8.5126
ENST00000468480	RNF6	0.000325342	0.00422766	2.14101	0.595679	3.24897	2.6335	0.731798	0.864952	0.153167	0.864952	ENSG00000127870	RNF6	8.50804	GO:0030517	negative regulation of axon extension	Any process that stops, prevents, or reduces the frequency, rate or extent of axon outgrowth. [GOC:mah]	ring finger protein (C3H2C3 type) 6	positive regulation of transcription DNA-templated
ENST00000523990	FBXO28	0.00220071	0.0204692	2.13885	0.69858	4.02344	3.64862	0.660901	1.53516	0.0625293	1.53516	ENSG00000143756	FBXO28	8.4897	GO:0005515	protein binding	Interacting selectively and non-covalently with any protein or protein complex (a complex of two or more proteins that may include other nonprotein molecules). [GOC:go_curators]	F-box protein 28
ENST00000435618	HLA-B	0.000601116	0.00707185	2.13685	0.622788	3.59297	3.06203	1.40151	0.343884	0.100628	0.343884	ENSG00000224608	HLA-B	8.47274	GO:0019882	antigen processing and presentation	The process in which an antigen-presenting cell expresses antigen (peptide or lipid) on its cell surface in association with an MHC protein complex. [GO_REF:0000022, GOC:add, GOC:mtg_15nov05, ISBN:0781735149, PMID:15771591, PMID:15928678]	major histocompatibility complex, class I, B	detection of bacterium
ENST00000428099	NFKB2	0.000124053	0.00186919	2.13635	0.556635	3.32884	3.11175	0.677041	0.717249	0.139164	0.717249	ENSG00000077150	NFKB2	8.46847				nuclear factor of kappa light polypeptide gene enhancer in B-cells 2 (p49/p100)	Common variable immunodeficiency
ENST00000553369	SRSF5	0.00579519	0.0440594	2.13603	0.774163	4.06354	5.22564	1.23805	1.45893	0.0599078	1.45893	ENSG00000100650	SRSF5	8.46578	GO:0006369	termination of RNA polymerase II transcription	The process in which the synthesis of an RNA molecule by RNA polymerase II using a DNA template is completed. [GOC:mah, GOC:txnOH]	serine/arginine-rich splicing factor 5
ENST00000545466	C1R	0.000649929	0.00753139	2.13587	0.626377	1.34352	3.03045	0.848185	0.917383	0.806814	0.917383	ENSG00000159403	C1R	8.46439	GO:0070062	extracellular exosome	A membrane-bounded vesicle that is released into the extracellular region by fusion of the limiting endosomal membrane of a multivesicular body with the plasma membrane. Extracellular exosomes, also simply called exosomes, have a diameter of about 40-100 nm. [GOC:BHF, GOC:mah, PMID:15908444, PMID:17641064, PMID:19442504, PMID:19498381, PMID:22418571, PMID:24009894]	complement component 1, r subcomponent	Immunodeficiency due to an early component of complement deficiency
ENST00000578121	TAF4B	0.00128757	0.0133196	2.13498	0.663296	1.46567	2.90122	1.23986	0.458726	0.739971	0.739971	ENSG00000141384	TAF4B	8.45684	GO:0051059	NF-kappaB binding	Interacting selectively and non-covalently with NF-kappaB, a transcription factor for eukaryotic RNA polymerase II promoters. [GOC:ai]	TATA-box binding protein associated factor 4b	Male infertility with azoospermia or oligozoospermia due to single gene mutation
ENST00000549471	TMBIM6	0.00530748	0.0411998	2.13412	0.765535	2.46858	3.58708	0.783273	1.85392	0.331416	1.85392	ENSG00000139644	TMBIM6	8.44963				transmembrane BAX inhibitor motif containing 6
ENST00000494335	HLA-B	1.7345e-07	5.84026e-06	2.13379	0.408322	2.38507	3.81304	0.393537	-0.0883867	0.356735	0.356735	ENSG00000232126	HLA-B	8.44683	GO:0019882	antigen processing and presentation	The process in which an antigen-presenting cell expresses antigen (peptide or lipid) on its cell surface in association with an MHC protein complex. [GO_REF:0000022, GOC:add, GOC:mtg_15nov05, ISBN:0781735149, PMID:15771591, PMID:15928678]	major histocompatibility complex, class I, B	SEVERE CUTANEOUS ADVERSE REACTION SUSCEPTIBILITY TO TOXIC EPIDERMAL NECROLYSIS SUSCEPTIBILITY TO INCLUDED
ENST00000481514	LGALS9	1.26765e-13	1.22233e-11	2.13208	0.28775	4.13747	1.6993	0.235176	0.137424	0.0553888	0.137424	ENSG00000168961	LGALS9	8.43242	GO:2001269	positive regulation of cysteine-type endopeptidase activity involved in apoptotic signaling pathway	Any process that activates or increases the frequency, rate or extent of cysteine-type endopeptidase activity involved in apoptotic signaling pathway. [GOC:mtg_apoptosis]	lectin, galactoside-binding, soluble, 9	cellular response to virus
ENST00000434433	SENP5	0.000255311	0.00345464	2.13121	0.582795	2.16832	2.34148	1.09962	-0.333959	0.428805	0.428805	ENSG00000119231	SENP5	8.42502	GO:0016929	SUMO-specific protease activity	Catalysis of the hydrolysis of SUMO, a small ubiquitin-related modifier, from previously sumoylated substrates. [GOC:rn, PMID:10094048, PMID:11031248, PMID:11265250]	SUMO1/sentrin specific peptidase 5
ENST00000482429	LTB	5.2543e-06	0.000121439	2.13111	0.467925	1.41943	1.78191	0.2205	0.337526	0.764794	0.764794	ENSG00000227507	LTB	8.42417	GO:0045084	positive regulation of interleukin-12 biosynthetic process	Any process that activates or increases the frequency, rate or extent of the chemical reactions and pathways resulting in the formation of interleukin-12. [GOC:go_curators]	lymphotoxin beta
ENST00000374672	KLF4	2.93697e-06	7.26022e-05	2.12926	0.45544	4.68982	1.60598	0.900834	-0.684785	0.0325804	0.0325804	ENSG00000136826	KLF4	8.40867	GO:2000342	negative regulation of chemokine (C-X-C motif) ligand 2 production	Any process that stops, prevents or reduces the frequency, rate or extent of chemokine (C-X-C motif) ligand 2 production. [GOC:BHF, GOC:mah]	Kruppel-like factor 4 (gut)	cellular response to laminar fluid shear stress
ENST00000555686	FOS	0.0019735	0.0187569	2.12581	0.687034	3.22225	3.99038	0.495195	1.62888	0.158053	1.62888	ENSG00000170345	FOS	8.37972	GO:0034614	cellular response to reactive oxygen species	Any process that results in a change in state or activity of a cell (in terms of movement, secretion, enzyme production, gene expression, etc.) as a result of a reactive oxygen species stimulus. Reactive oxygen species include singlet oxygen, superoxide, and oxygen free radicals. [GOC:mah]	FBJ murine osteosarcoma viral oncogene homolog	Berardinelli-Seip congenital lipodystrophy
ENST00000335507	CIDECP	0.000470503	0.00580029	2.12543	0.607785	2.10982	2.67394	0.611985	1.05033	0.450115	1.05033	ENSG00000186162	CIDECP	8.3765
ENST00000486620	TRMU	0.00111964	0.0118987	2.12467	0.65202	1.76876	2.13026	1.32208	-0.300809	0.591004	0.591004	ENSG00000100416	TRMU	8.37016	GO:0008033	tRNA processing	The process in which a pre-tRNA molecule is converted to a mature tRNA, ready for addition of an aminoacyl group. [GOC:jl, PMID:12533506]	tRNA 5-methylaminomethyl-2-thiouridylate methyltransferase	Acute infantile liver failure due to synthesis defect of mtDNA-encoded proteins
ENST00000492381	MED15	1.54292e-07	5.2489e-06	2.12402	0.404779	3.02381	2.58069	0.51688	0.220427	0.196586	0.220427	ENSG00000099917	MED15	8.36472	GO:0016592	mediator complex	A protein complex that interacts with the carboxy-terminal domain of the largest subunit of RNA polymerase II and plays an active role in transducing the signal from a transcription factor to the transcriptional machinery. The mediator complex is required for activation of transcription of most protein-coding genes, but can also act as a transcriptional corepressor. The Saccharomyces complex cont…	mediator complex subunit 15
ENST00000460703	UBA7	1.17909e-13	1.14568e-11	2.12323	0.286184	4.22542	1.66261	0.0420032	0.326552	0.0505202	0.326552	ENSG00000182179	UBA7	8.35808	GO:0019782	ISG15 activating enzyme activity	Catalysis of the activation of the small ubiquitin-related modifier ISG15, through the formation of an ATP-dependent high-energy thiolester bond. [GOC:mah]	ubiquitin-like modifier activating enzyme 7
ENST00000490406	SERBP1	0.000169592	0.0024428	2.12311	0.564587	1.21664	1.77227	0.553687	0.050565	0.880724	0.880724	ENSG00000142864	SERBP1	8.35711	GO:0003730	mRNA 3'-UTR binding	Interacting selectively and non-covalently with the 3' untranslated region of an mRNA molecule. [GOC:mah]	SERPINE1 mRNA binding protein 1
ENST00000419135	HLA-C	7.92187e-05	0.00127648	2.12287	0.537878	2.14132	2.57157	0.863375	0.0831697	0.438535	0.438535	ENSG00000225691	HLA-C	8.3551	GO:0019882	antigen processing and presentation	The process in which an antigen-presenting cell expresses antigen (peptide or lipid) on its cell surface in association with an MHC protein complex. [GO_REF:0000022, GOC:add, GOC:mtg_15nov05, ISBN:0781735149, PMID:15771591, PMID:15928678]	major histocompatibility complex, class I, C	PSORIASIS 1 SUSCEPTIBILITY TO
ENST00000534233	HYOU1	0.000124498	0.00187397	2.12247	0.553146	1.47642	2.17566	0.642582	0.283447	0.734284	0.734284	ENSG00000149428	HYOU1	8.35177	GO:1903298	negative regulation of hypoxia-induced intrinsic apoptotic signaling pathway	Any process that stops, prevents or reduces the frequency, rate or extent of hypoxia-induced intrinsic apoptotic signaling pathway. [GO_REF:0000058, GOC:bf, GOC:PARL, GOC:TermGenie, PMID:24553947]	hypoxia up-regulated 1
ENST00000628974	HYOU1	0.000124498	0.00187397	2.12247	0.553146	1.47642	2.17566	0.642582	0.283447	0.734284	0.734284	ENSG00000280682	HYOU1	8.35177	GO:1903298	negative regulation of hypoxia-induced intrinsic apoptotic signaling pathway	Any process that stops, prevents or reduces the frequency, rate or extent of hypoxia-induced intrinsic apoptotic signaling pathway. [GO_REF:0000058, GOC:bf, GOC:PARL, GOC:TermGenie, PMID:24553947]	hypoxia up-regulated 1
ENST00000296533	NPY1R	1.20169e-08	5.27303e-07	2.12065	0.372077	2.32803	1.75357	0.248208	0.354594	0.374776	0.374776	ENSG00000164128	NPY1R	8.33651	GO:0001602	pancreatic polypeptide receptor activity	Combining with pancreatic polypeptide PP to initiate a change in cell activity. [PMID:9315606]	neuropeptide Y receptor Y1	outflow tract morphogenesis
ENST00000463777	PLSCR1	0.00048713	0.00596254	2.12024	0.607914	1.07733	3.09561	0.695585	0.554823	0.967434	0.967434	ENSG00000188313	PLSCR1	8.33317	GO:2000373	positive regulation of DNA topoisomerase (ATP-hydrolyzing) activity	Any process that activates or increases the frequency, rate or extent of DNA topoisomerase (ATP-hydrolyzing) activity. [GOC:mah]	phospholipid scramblase 1	defense response to virus
ENST00000349033	TEX14	3.01498e-07	9.53976e-06	2.11841	0.41355	2.94033	1.90307	0.229552	0.540053	0.213391	0.540053	ENSG00000121101	TEX14	8.31792	GO:0051306	mitotic sister chromatid separation	The process in which sister chromatids are physically detached from each other during mitosis. [GOC:ai]	testis expressed 14
ENST00000265997	CPEB3	0.000741423	0.00842903	2.11792	0.627758	3.02441	2.22709	1.57689	-0.404201	0.196466	0.196466	ENSG00000107864	CPEB3	8.31383	GO:1900365	positive regulation of mRNA polyadenylation	Any process that activates or increases the frequency, rate or extent of mRNA polyadenylation. [GOC:se, GOC:TermGenie, PMID:15121841]	cytoplasmic polyadenylation element binding protein 3
ENST00000477068	SP110	4.24169e-30	1.58944e-27	2.11303	0.185374	5.37768	1.32114	0.00830737	0.146328	0.0224801	0.146328	ENSG00000135899	SP110	8.27325	GO:0016032	viral process	A multi-organism process in which a virus is a participant. The other participant is the host. Includes infection of a host cell, replication of the viral genome, and assembly of progeny virus particles. In some cases the viral genetic material may integrate into the host genome and only subsequently, under particular circumstances, 'complete' its life cycle. [GOC:bf, GOC:jl, GOC:mah]	SP110 nuclear body protein	Hepatic veno-occlusive disease - immunodeficiency
ENST00000552054	TBX3	2.89731e-14	3.08448e-12	2.11228	0.277828	3.03266	2.77777	0.152531	0.190733	0.194816	0.194816	ENSG00000135111	TBX3	8.26704	GO:0090398	cellular senescence	A cell aging process stimulated in response to cellular stress, whereby normal cells lose the ability to divide through irreversible cell cycle arrest. [GOC:BHF]	T-box 3	ULNAR-MAMMARY SYNDROME
ENST00000471023	NOP56	0.000130415	0.00195089	2.11225	0.552125	2.42131	2.37387	1.02621	-0.0842861	0.345584	0.345584	ENSG00000101361	NOP56	8.26683	GO:1990226	histone methyltransferase binding	Interacting selectively and non-covalently with a histone methyltransferase enzyme. [GOC:ame, GOC:BHF, PMID:19486527]	NOP56 ribonucleoprotein	Spinocerebellar ataxia type 36
ENST00000515088	DDX60L	4.01644e-22	9.53029e-20	2.11191	0.218382	4.40413	1.65291	0.044788	0.16982	0.0421828	0.16982	ENSG00000181381	DDX60L	8.26398	GO:0004386	helicase activity	Catalysis of the reaction: NTP + H2O = NDP + phosphate, to drive the unwinding of a DNA or RNA helix. [GOC:mah, ISBN:0198506732]	DEAD (Asp-Glu-Ala-Asp) box polypeptide 60-like
ENST00000429828	NUTM2B	0.000741957	0.00843258	2.11124	0.625814	3.22125	3.58147	0.942337	0.820058	0.158238	0.820058	ENSG00000188199	NUTM2B	8.25846				NUT family member 2B	Endometrial stromal sarcoma
ENST00000463977	TRIM26	0.000274186	0.00365708	2.11029	0.579983	2.42478	2.51451	1.00202	0.511688	0.344531	0.511688	ENSG00000137313	TRIM26	8.25064	GO:1902187	negative regulation of viral release from host cell	Any process that stops, prevents or reduces the frequency, rate or extent of viral release from host cell. [GOC:TermGenie, PMID:18305167]	tripartite motif containing 26
ENST00000471458	TRIM26	0.000274186	0.00365708	2.11029	0.579983	2.42478	2.51451	1.00202	0.511688	0.344531	0.511688	ENSG00000228881	TRIM26	8.25064	GO:1902187	negative regulation of viral release from host cell	Any process that stops, prevents or reduces the frequency, rate or extent of viral release from host cell. [GOC:TermGenie, PMID:18305167]	tripartite motif containing 26
ENST00000480999	TRIM26	0.000274186	0.00365708	2.11029	0.579983	2.42478	2.51451	1.00202	0.511688	0.344531	0.511688	ENSG00000234127	TRIM26	8.25064	GO:1902187	negative regulation of viral release from host cell	Any process that stops, prevents or reduces the frequency, rate or extent of viral release from host cell. [GOC:TermGenie, PMID:18305167]	tripartite motif containing 26
ENST00000487616	TRIM26	0.000274186	0.00365708	2.11029	0.579983	2.42478	2.51451	1.00202	0.511688	0.344531	0.511688	ENSG00000226060	TRIM26	8.25064	GO:1902187	negative regulation of viral release from host cell	Any process that stops, prevents or reduces the frequency, rate or extent of viral release from host cell. [GOC:TermGenie, PMID:18305167]	tripartite motif containing 26
ENST00000510870	RAP1GDS1	0.000430947	0.00538634	2.11017	0.599416	1.65953	2.00769	0.974812	-0.0507504	0.642035	0.642035	ENSG00000138698	RAP1GDS1	8.2496	GO:0005488	binding	The selective, non-covalent, often stoichiometric, interaction of a molecule with one or more specific sites on another molecule. [GOC:ceb, GOC:mah, ISBN:0198506732]	RAP1, GTP-GDP dissociation stimulator 1	negative regulation of endoplasmic reticulum calcium ion concentration
ENST00000543033	TAOK2	0.00409172	0.0335636	2.10985	0.734883	1.04869	3.46074	1.09148	1.33876	0.986012	1.33876	ENSG00000149930	TAOK2	8.24702	GO:0031434	mitogen-activated protein kinase kinase binding	Interacting selectively and non-covalently with a mitogen-activated protein kinase kinase, any protein that can phosphorylate a MAP kinase. [GOC:mah]	TAO kinase 2	G2 DNA damage checkpoint
ENST00000483835	TRIM5	0.00279283	0.0248119	2.10969	0.70566	0.94359	3.01017	1.18431	0.652903	1.05649	1.05649	ENSG00000132256	TRIM5	8.24566	GO:1990462	omegasome	Omega-shaped (as in the Greek capital letter) intracellular membrane-bounded organelle enriched in phosphatidylinositol 3-phosphate and dynamically connected to the endoplasmic reticulum. Omegasomes are the first step of the formation of autophagosomes via the pre-autophagosomal structures. [GOC:autophagy, GOC:mf, PMID:18725538, PMID:24591649]	tripartite motif containing 5	positive regulation of I-kappaB kinase/NF-kappaB signaling
ENST00000475452	HLA-C	7.75052e-05	0.00125355	2.10391	0.532368	4.66528	5.37777	0.374264	0.901108	0.0332469	0.901108	ENSG00000225691	HLA-C	8.19818	GO:0019882	antigen processing and presentation	The process in which an antigen-presenting cell expresses antigen (peptide or lipid) on its cell surface in association with an MHC protein complex. [GO_REF:0000022, GOC:add, GOC:mtg_15nov05, ISBN:0781735149, PMID:15771591, PMID:15928678]	major histocompatibility complex, class I, C	PSORIASIS 1 SUSCEPTIBILITY TO
ENST00000345813	ZNF274	0.00230218	0.0211788	2.10133	0.689368	2.33134	3.05965	1.26459	0.873944	0.373712	0.873944	ENSG00000171606	ZNF274	8.17705	GO:0005166	neurotrophin p75 receptor binding	Interacting selectively and non-covalently with the neurotrophin p75 receptor. [GOC:ai]	zinc finger protein 274
ENST00000566749	PPP4C	0.00138053	0.0140983	2.10081	0.656773	2.56624	3.31698	1.00803	0.933047	0.303489	0.933047	ENSG00000149923	PPP4C	8.17283				protein phosphatase 4 catalytic subunit	negative regulation of double-strand break repair via homologous recombination
ENST00000490880	SP110	8.80079e-11	5.6502e-09	2.09943	0.323675	3.05179	1.4311	0.280446	0.0187239	0.190997	0.190997	ENSG00000135899	SP110	8.16152	GO:0016032	viral process	A multi-organism process in which a virus is a participant. The other participant is the host. Includes infection of a host cell, replication of the viral genome, and assembly of progeny virus particles. In some cases the viral genetic material may integrate into the host genome and only subsequently, under particular circumstances, 'complete' its life cycle. [GOC:bf, GOC:jl, GOC:mah]	SP110 nuclear body protein	Hepatic veno-occlusive disease - immunodeficiency
ENST00000524244	PTTG1	0.000188047	0.00266801	2.09834	0.56187	1.14027	1.77671	0.493122	0.192007	0.92752	0.92752	ENSG00000164611	PTTG1	8.15259	GO:2000816	negative regulation of mitotic sister chromatid separation	Any process that stops, prevents or reduces the frequency, rate or extent of mitotic sister chromatid separation. [GOC:obol]	pituitary tumor-transforming 1
ENST00000466695	UST	0.000466333	0.00575638	2.09733	0.599341	1.69461	2.67402	0.991112	0.549805	0.625333	0.625333	ENSG00000111962	UST	8.14436	GO:0006477	protein sulfation	The addition of a sulfate group as an ester to a protein amino acid. [GOC:curators]	uronyl-2-sulfotransferase
ENST00000409465	STAT1	1.5394e-05	0.000312865	2.0951	0.484642	5.48984	1.46868	1.03536	-0.710363	0.0215952	0.0215952	ENSG00000115415	STAT1	8.12622	GO:0003700	transcription factor activity, sequence-specific DNA binding	Interacting selectively and non-covalently with a specific DNA sequence in order to modulate transcription. The transcription factor may or may not also interact selectively with a protein or macromolecular complex. [GOC:curators, GOC:txnOH]	signal transducer and activator of transcription 1	Autoimmune enteropathy and endocrinopathy-susceptibility to chronic infections syndrome
ENST00000420849	MED15	4.34353e-07	1.31774e-05	2.09457	0.414501	1.822	1.67396	0.205986	0.309245	0.567162	0.567162	ENSG00000099917	MED15	8.12199	GO:0016592	mediator complex	A protein complex that interacts with the carboxy-terminal domain of the largest subunit of RNA polymerase II and plays an active role in transducing the signal from a transcription factor to the transcriptional machinery. The mediator complex is required for activation of transcription of most protein-coding genes, but can also act as a transcriptional corepressor. The Saccharomyces complex cont…	mediator complex subunit 15
ENST00000586195	EML2	0.00642684	0.0479089	2.09249	0.76784	3.26389	3.61601	1.71407	0.939035	0.15048	0.939035	ENSG00000125746	EML2	8.10511	GO:0005515	protein binding	Interacting selectively and non-covalently with any protein or protein complex (a complex of two or more proteins that may include other nonprotein molecules). [GOC:go_curators]	echinoderm microtubule associated protein like 2
ENST00000339123	SMOX	0.00297947	0.0261296	2.0918	0.704344	4.35199	4.32914	0.755574	1.47688	0.0444117	1.47688	ENSG00000088826	SMOX	8.09945	GO:0052895	N1-acetylspermine:oxygen oxidoreductase (N1-acetylspermidine-forming) activity	Catalysis of the reaction: N1-acetylspermine + oxygen + H2O = N1-acetylspermidine + 3-aminopropanal + hydrogen peroxide. [MetaCyc:POLYAMINE-OXIDASE-RXN]	spermine oxidase
ENST00000341617	GRM8	0.000443216	0.00552327	2.09154	0.595386	1.26866	2.84426	0.74532	0.36536	0.849859	0.849859	ENSG00000179603	GRM8	8.09738	GO:0030818	negative regulation of cAMP biosynthetic process	Any process that stops, prevents, or reduces the frequency, rate or extent of the chemical reactions and pathways resulting in the formation of the nucleotide cAMP (cyclic AMP, adenosine 3',5'-cyclophosphate). [GOC:mah]	glutamate receptor, metabotropic 8	G-protein coupled receptor activity
ENST00000419841	C7orf43	0.000211404	0.00294204	2.09118	0.564423	3.01791	2.44697	0.450306	0.983275	0.197768	0.983275	ENSG00000146826	C7orf43	8.09445				chromosome 7 open reading frame 43
ENST00000535267	STARD10	0.00148796	0.0150151	2.09097	0.658153	1.33586	3.0588	0.6939	1.25534	0.811146	1.25534	ENSG00000214530	STARD10	8.09273	GO:0008289	lipid binding	Interacting selectively and non-covalently with a lipid. [GOC:ai]	StAR related lipid transfer domain containing 10
ENST00000240101	DUSP4	1.44475e-08	6.20291e-07	2.08993	0.368725	2.40062	1.57614	0.25989	0.208519	0.351921	0.351921	ENSG00000120875	DUSP4	8.08437	GO:0008330	protein tyrosine/threonine phosphatase activity	Catalysis of the reactions: protein threonine phosphate + H2O = protein threonine + phosphate; and protein tyrosine phosphate + H2O = protein tyrosine + phosphate. [GOC:mah]	dual specificity phosphatase 4
ENST00000561878	TMEM170A	0.000346334	0.00445598	2.08923	0.583924	3.16265	2.86064	0.787268	0.747083	0.169271	0.747083	ENSG00000166822	TMEM170A	8.07873	GO:0016021	integral component of membrane	The component of a membrane consisting of the gene products and protein complexes having at least some part of their peptide sequence embedded in the hydrophobic region of the membrane. [GOC:dos, GOC:go_curators]	transmembrane protein 170A
ENST00000375244	TNXB	0.00122304	0.0127932	2.08921	0.646124	3.0168	3.25873	1.28968	0.588962	0.19799	0.588962	ENSG00000168477	TNXB	8.07853	GO:0005583	fibrillar collagen trimer	Any triple helical collagen trimer that forms fibrils. [GOC:mah, ISBN:0721639976, PMID:21421911]	tenascin XB	Ehlers-Danlos syndrome due to tenascin-X deficiency
ENST00000471382	BATF3	8.74133e-07	2.45149e-05	2.08862	0.424686	2.36922	3.63101	0.314869	0.496741	0.361685	0.496741	ENSG00000123685	BATF3	8.07378	GO:0097028	dendritic cell differentiation	The process in which a precursor cell type acquires the specialized features of a dendritic cell. A dendritic cell is a leukocyte of dendritic lineage specialized in the uptake, processing, and transport of antigens to lymph nodes for the purpose of stimulating an immune response via T cell activation. [CL:0000451, GOC:pr]	basic leucine zipper transcription factor, ATF-like 3
ENST00000438495	NCOA7	6.56849e-25	1.8279e-22	2.08722	0.20251	6.47994	1.32055	0.137364	0.0471815	0.0152214	0.0471815	ENSG00000111912	NCOA7	8.06244	GO:0035257	nuclear hormone receptor binding	Interacting selectively and non-covalently with a nuclear hormone receptor, a ligand-dependent receptor found in the nucleus of the cell. [GOC:bf]	nuclear receptor coactivator 7
ENST00000468421	MSX1	6.57003e-05	0.00108701	2.08669	0.522805	1.42411	1.87469	0.467709	0.350591	0.762252	0.762252	ENSG00000163132	MSX1	8.05822	GO:0035880	embryonic nail plate morphogenesis	The process, occurring in the embryo, by which the anatomical structures of a nail plate are generated and organized. The nail plate is the hard and translucent portion of the nail, composed of keratin, and serves to protect the tips of digits. [GOC:BHF, GOC:vk, ISBN:0323025781, PMID:11369996, UBERON:0008198, Wikipedia:Nail_(anatomy)]	msh homeobox 1	Hypodontia - dysplasia of nails
[truncated: 1,690 more rows]
